# Supplementary material for: Cell cycle, oncogenic and tumor suppressor pathways regulate numerous long and macro non-protein-coding RNAs
Source: PubMed Central journal article supplement (PMC4054595; doi:10.1186/gb-2014-15-3-r48), 2014-03-04
Supplement: gb-2014-15-3-r48-S1.pdf [file gb-2014-15-3-r48-S1.pdf]

## Additional file:

# Cell cycle, oncogenic and tumor suppressor pathways regulate numerous long and macro non-protein coding RNAs

February 6, 2014

Jörg Hackermüller<sup>1,2,†,\*</sup>, Kristin Reiche<sup>1,2,†,\*</sup>, Christian Otto<sup>3,4</sup>, Nadine Hösler<sup>5,4</sup>, Conny Blumert<sup>5,6</sup>, Katja Brocke-Heidrich<sup>5</sup>, Levin Böhlig<sup>7</sup>, Anne Nitsche<sup>3</sup>, Katharina Kasack<sup>5,4,2</sup>, Peter Ahnert<sup>4,8</sup>, Wolfgang Krupp<sup>9</sup>, Kurt Engeland<sup>7</sup>, Peter F. Stadler<sup>3,2,10,11,12</sup>, Friedemann Horn<sup>5,6</sup>

**1 Young Investigators Group Bioinformatics and Transcriptomics, Department Proteomics, Helmholtz Centre for Environmental Research – UFZ, Leipzig, Germany and Department for Computer Science, University of Leipzig, Leipzig, Germany**

**2 RNomics Group, Department of Diagnostics, Fraunhofer Institute for Cell Therapy and Immunology– IZI, Leipzig, Germany**

**3 Bioinformatics Group, Department of Computer Science, University of Leipzig, Leipzig, Germany**

**4 LIFE - Leipzig Research Center for Civilization Diseases, University of Leipzig, Leipzig, Germany**

**5 Institute of Clinical Immunology, University of Leipzig, Leipzig, Germany**

**6 Department of Diagnostics, Fraunhofer Institute for Cell Therapy and Immunology– IZI, Leipzig, Germany**

**7 Molecular Oncology, Medical School, University of Leipzig, Leipzig, Germany**

**8 Institute for Medical Informatics, Statistics and Epidemiology, University of Leipzig, Leipzig, Germany**

**9 Clinic of Neurosurgery, University of Leipzig, Leipzig, Germany**

**10 Max-Planck Institute for Mathematics in the Sciences, Leipzig, Germany**

**11 Santa Fe Institute, Santa Fe, New Mexico, United States of America**

**12 Department of Theoretical Chemistry, University of Vienna, Vienna, Austria**

**† These authors contributed equally.**

**\* E-mail: joerg.hackermueller@ufz.de, kristin.reiche@ufz.de**

# Contents

|          |                                                                                                        |           |
|----------|--------------------------------------------------------------------------------------------------------|-----------|
| <b>1</b> | <b>STAT3 and P53 activation, and cell cycle synchronization</b>                                        | <b>5</b>  |
| 1.1      | STAT3 activation . . . . .                                                                             | 5         |
| 1.2      | P53 activation . . . . .                                                                               | 5         |
| 1.3      | Cell cycle synchronization . . . . .                                                                   | 6         |
| <b>2</b> | <b>Transcriptionally active regions (TARs)</b>                                                         | <b>7</b>  |
| 2.1      | Significantly expressed regions (TileShuffle) . . . . .                                                | 7         |
| <b>3</b> | <b>Differentially expressed TARs (DE-TARs)</b>                                                         | <b>9</b>  |
| 3.1      | Significantly differentially expressed regions (TileShuffle) . . . . .                                 | 9         |
| 3.2      | FDR estimation using the nONCOchip custom array . . . . .                                              | 11        |
| 3.3      | Independent 3'UTR expression . . . . .                                                                 | 12        |
| 3.4      | DE-TAR overlap with genomic annotation . . . . .                                                       | 14        |
| 3.5      | <i>Bona fide</i> non-coding DE-TARs overlap with genomic annotation . . . . .                          | 17        |
| <b>4</b> | <b>Representation of TARs and DE-TARs on nONCOchip custom array</b>                                    | <b>23</b> |
| <b>5</b> | <b>MacroRNAs</b>                                                                                       | <b>24</b> |
| 5.1      | Evolutionary selection acting on STAiR1 compared to its neighbor protein-coding genes . . . . .        | 39        |
| <b>6</b> | <b>Disease associated ncRNAs</b>                                                                       | <b>41</b> |
| 6.1      | Clinical data of astrocytoma tumor subtypes . . . . .                                                  | 41        |
| 6.2      | Content of the custom microarray - nONCOchip . . . . .                                                 | 42        |
| 6.3      | Differential expression of astrocytoma of grade I versus aggressive states (grade III or IV) . . . . . | 43        |
| 6.4      | <i>Bona fide</i> non-coding probes overlap with genomic annotation and DE-TARs . . . . .               | 44        |
| 6.5      | Proximal ncRNA – mRNA pairs . . . . .                                                                  | 48        |
| <b>7</b> | <b>Supplemental material and methods</b>                                                               | <b>54</b> |
| 7.1      | Primers for RT-PCR and CHIP . . . . .                                                                  | 54        |
| 7.2      | Annotation categories . . . . .                                                                        | 55        |

## List of Figures

|            |                                                                                                   |    |
|------------|---------------------------------------------------------------------------------------------------|----|
| Figure S1  | STAT3 activation in INA-6 cells . . . . .                                                         | 5  |
| Figure S2  | P53 activation . . . . .                                                                          | 5  |
| Figure S3  | Cell cycle synchronization of HFF cells . . . . .                                                 | 6  |
| Figure S4  | Transcriptionally active regions . . . . .                                                        | 7  |
| Figure S5  | Transcriptionally active <i>bona fide</i> non-coding regions in introns . . . . .                 | 8  |
| Figure S6  | Differentially expressed TARs (DE-TARs) . . . . .                                                 | 9  |
| Figure S7  | Differentially expressed <i>bona fide</i> non-coding TARs in introns . . . . .                    | 10 |
| Figure S8  | FDR estimation using the nONCOchip custom array . . . . .                                         | 11 |
| Figure S9  | Independent 3'UTR expression . . . . .                                                            | 12 |
| Figure S10 | DE-TAR overlap with genomic annotation . . . . .                                                  | 14 |
| Figure S11 | <i>Bona fide</i> non-coding DE-TARs in intergenic space overlap with genomic annotation . . . . . | 17 |
| Figure S12 | STAiR2 . . . . .                                                                                  | 24 |
| Figure S13 | STAiR18 . . . . .                                                                                 | 25 |
| Figure S14 | STAiR1 conserved elements . . . . .                                                               | 26 |
| Figure S15 | STAT3 binding site in STAiR1 . . . . .                                                            | 27 |
| Figure S16 | Intron length variation man - dog . . . . .                                                       | 28 |
| Figure S17 | Macro RNA signal slopes . . . . .                                                                 | 29 |
| Figure S18 | DE-Probes overlap with different annotation categories . . . . .                                  | 44 |
| Figure S19 | Proximal ncRNA – mRNA pairs . . . . .                                                             | 48 |

## List of Tables

|           |                                                                                                                          |    |
|-----------|--------------------------------------------------------------------------------------------------------------------------|----|
| Table S1  | Transcriptionally active regions . . . . .                                                                               | 7  |
| Table S2  | Differentially expressed regions (DE-TARs) . . . . .                                                                     | 9  |
| Table S3  | Independent 3'UTR expression upon STAT3 activation . . . . .                                                             | 13 |
| Table S4  | DE-TAR overlap with protein coding genes. . . . .                                                                        | 15 |
| Table S5  | DE-TAR overlap with regulatory sites and epigenetically modified regions. . . . .                                        | 16 |
| Table S6  | Intergenic <i>bona fide</i> non-coding DE-TAR overlap with known non-coding RNAs. . . . .                                | 18 |
| Table S7  | Intergenic <i>bona fide</i> non-coding DE-TAR overlap with regulatory sites and epigenetically modified regions. . . . . | 19 |
| Table S8  | Intronic <i>bona fide</i> non-coding DE-TAR overlap with known non-coding RNAs. . . . .                                  | 20 |
| Table S9  | Intronic <i>bona fide</i> non-coding DE-TAR overlap with regulatory sites and epigenetically modified regions. . . . .   | 21 |
| Table S10 | LncRNAs with known function overlapped by <i>bona fide</i> non-coding DE-TARs . . . . .                                  | 22 |
| Table S11 | Representation of TARs and DE-TARs on custom array . . . . .                                                             | 23 |
| Table S12 | DE-macroRNAs. . . . .                                                                                                    | 30 |
| Table S13 | DE-macroRNA overlap with known non-coding RNAs. . . . .                                                                  | 33 |
| Table S14 | DE-macroRNA overlap with regulatory sites and epigenetically modified regions. . . . .                                   | 35 |
| Table S15 | DE-macroRNA overlap with repeat regions. . . . .                                                                         | 37 |

|           |                                                                                                                                                                                                                 |    |
|-----------|-----------------------------------------------------------------------------------------------------------------------------------------------------------------------------------------------------------------|----|
| Table S16 | Evolutionary selection acting on STAiR1 compared to its neighbor protein-coding genes <i>SETBP1</i> and <i>SYT4</i> . . . . .                                                                                   | 40 |
| Table S17 | Clinical, pathological, and immunohistochemical data of presented tumors. For the proliferative marker Ki67, percentage values were attributed to each case evaluating ten fields (x400 magnification). . . . . | 41 |
| Table S18 | nONCOchip custom microarray . . . . .                                                                                                                                                                           | 42 |
| Table S19 | Differential expression between brain tumors . . . . .                                                                                                                                                          | 43 |
| Table S20 | <i>Bona fide</i> non-coding DE-Probes overlap with known ncRNAs. . . . .                                                                                                                                        | 45 |
| Table S21 | <i>Bona fide</i> non-coding DE-Probes overlap with regulatory sites and epigenetically modified regions. . . . .                                                                                                | 46 |
| Table S22 | <i>Bona fide</i> non-coding DE-Probes overlap with DE-TARs. . . . .                                                                                                                                             | 47 |
| Table S23 | Protein-coding genes proximal to <i>bona fide</i> non-coding DE-Probes and related to astrocytoma . . . . .                                                                                                     | 49 |
| Table S24 | GO term enrichment for protein-coding genes proximal to <i>bona fide</i> non-coding DE-Probes in intergenic space. . . . .                                                                                      | 50 |
| Table S25 | GO term enrichment for protein-coding genes with <i>bona fide</i> non-coding DE-Probes in introns. . . . .                                                                                                      | 52 |
| Table S26 | GO term enrichment for protein-coding genes with antisense <i>bona fide</i> non-coding DE-Probes. . . . .                                                                                                       | 53 |
| Table S27 | Primer sequences . . . . .                                                                                                                                                                                      | 54 |
| Table S28 | Overview of used annotation categories . . . . .                                                                                                                                                                | 57 |

# 1 STAT3 and P53 activation, and cell cycle synchronization

## 1.1 STAT3 activation

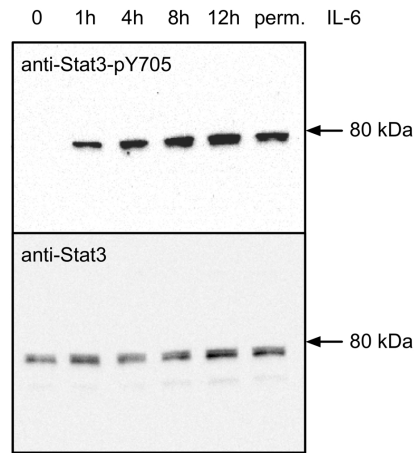

Figure S1: **STAT3 activation in INA-6 cells.** Human multiple myeloma INA-6 cells were permanently (perm.) cultivated in the presence of interleukin-6 (IL-6), or were restimulated by addition of IL-6 to the medium for the indicated periods after withdrawal from cytokine for 12 h. Subsequently, cells were lysed and proteins separated by SDS-polyacrylamide electrophoresis. STAT3 and activated STAT3 were detected by immunoblotting using antibodies to STAT3 (# 9132; Cell Signaling Technology, Dancers, MA, USA) and to STAT3 phosphorylated at tyrosine residue 705 (STAT3-pY705; # 9131; Cell Signaling Technology), respectively. STAT3 bands were visualized by chemiluminescence.

## 1.2 P53 activation

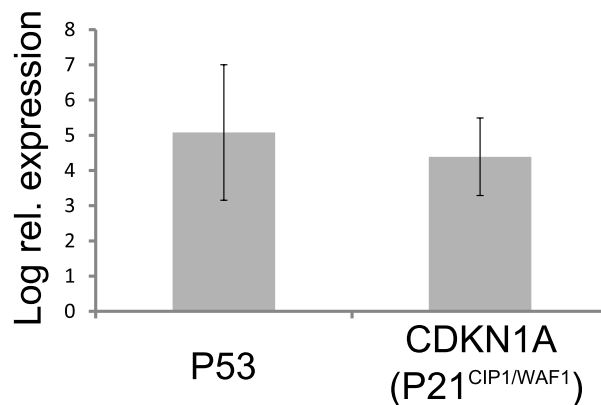

Figure S2: **P53 activation.** Regulation of p21<sup>CIP1/WAF1</sup> mRNA after induction of P53 for 6h in D53wt cells. mRNAs were measured by real time RT-PCR as previously described [1, 2]. Relative expression (log<sub>2</sub> values) compared to expression in control cells is shown. GAPDH mRNA expression was used for normalization [3].

### 1.3 Cell cycle synchronization

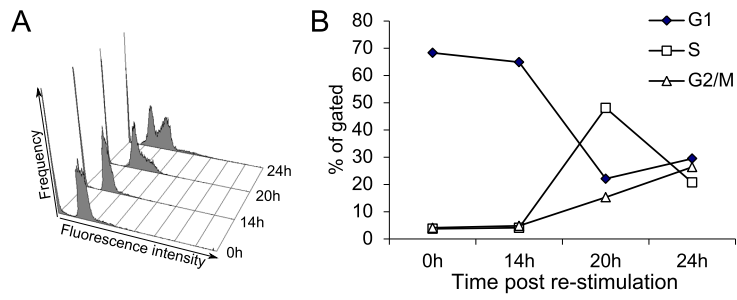

Figure S3: **Cell cycle distribution after starvation and restimulation of HFF cells.** Cells were starved for two days (0h) and restimulated with FCS containing media for the indicated time points [4]. (A) and (B) Cell cycle profiles were analysed by FACS and data evaluation was done with WinMDI [4].

## 2 Transcriptionally active regions (TARs)

### 2.1 Significantly expressed regions (TileShuffle)

| Survey | Survey                                     | all      | CDS      | <i>Bona fide non-coding</i> |         |          |         |        |
|--------|--------------------------------------------|----------|----------|-----------------------------|---------|----------|---------|--------|
|        |                                            |          |          | intergenic                  |         | intronic |         |        |
| CC     | G0                                         | 17926188 | 8411574  | (0.46)                      | 1499907 | (0.08)   | 5193188 | (0.28) |
|        | G1                                         | 21117194 | 10574212 | (0.50)                      | 1626415 | (0.07)   | 5768644 | (0.27) |
|        | S                                          | 17610295 | 8771773  | (0.49)                      | 1405967 | (0.07)   | 4632563 | (0.26) |
|        | G2                                         | 19682850 | 9948039  | (0.50)                      | 1494893 | (0.07)   | 5186835 | (0.26) |
| P53    | Normal                                     | 22766570 | 10906780 | (0.47)                      | 1739895 | (0.07)   | 7187124 | (0.31) |
|        | Induced                                    | 20635594 | 8318917  | (0.40)                      | 1750770 | (0.08)   | 6430997 | (0.31) |
| STAT3  | Permanent cultured in IL-6                 | 20949089 | 9824387  | (0.46)                      | 1927838 | (0.09)   | 5844054 | (0.27) |
|        | 13h withdrawal of IL-6                     | 19656569 | 9101103  | (0.46)                      | 1745686 | (0.08)   | 5613915 | (0.28) |
|        | 1h IL-6 restimulation after 13h withdrawal | 21467128 | 9848306  | (0.45)                      | 1952753 | (0.09)   | 6313951 | (0.29) |

Table S1: **Transcriptionally active regions.** Overall number of significantly expressed nucleotides (TileShuffle  $q < 0.05$ ) as well as number of significantly expressed nucleotides in protein-coding exons (Gencode v12, Ensembl genes, UCSC genes or RefSeq genes), in intergenic regions and in introns of known protein-coding genes.

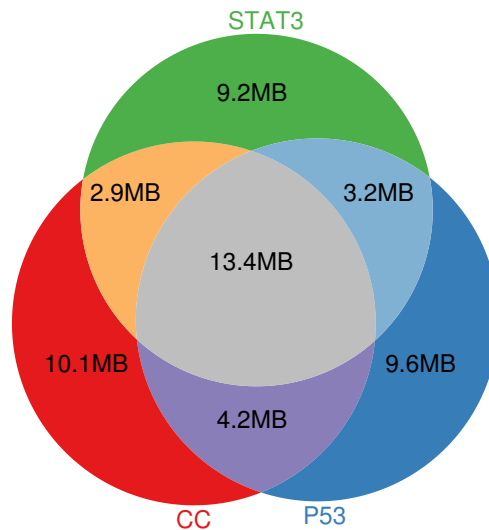

Figure S4: **Transcriptionally active regions.** Overall number of significantly expressed nucleotides (TileShuffle  $q < 0.05$ ) and their nucleotide-wise overlaps between all three transcriptome-wide surveys.

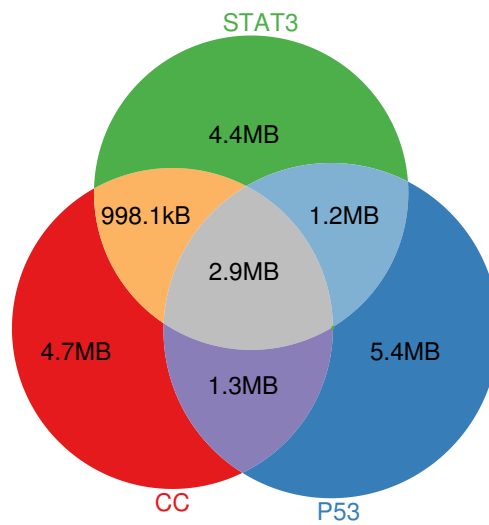

Figure S5: **Transcriptionally active *bona fide* non-coding regions in introns.** Number of significantly expressed nucleotides (TileShuffle  $q < 0.05$ ) in introns of known protein-coding genes (Gencode v12, Ensembl genes, UCSC genes or RefSeq genes) and their nucleotide-wise overlaps between all three transcriptome-wide surveys.



### 3 Differentially expressed TARs (DE-TARs)

#### 3.1 Significantly differentially expressed regions (TileShuffle)

| Survey | Survey                                                  | all     | CDS            | <i>Bona fide</i> non-coding |                |  |  |
|--------|---------------------------------------------------------|---------|----------------|-----------------------------|----------------|--|--|
|        |                                                         |         |                | intergenic                  | intronic       |  |  |
| CC     | G0 vs. G1                                               | 1713009 | 966179 (0.56)  | 94602 (0.05)                | 491298 (0.28)  |  |  |
|        | G1 vs. S                                                | 34628   | 25015 (0.72)   | 3371 (0.09)                 | 5004 (0.14)    |  |  |
|        | S vs. G2                                                | 9203    | 5008 (0.54)    | 1089 (0.11)                 | 2776 (0.30)    |  |  |
|        | G2 vs. G0                                               | 1627902 | 931887 (0.57)  | 73824 (0.04)                | 432643 (0.26)  |  |  |
| P53    | Normal vs. induced                                      | 4094296 | 1596403 (0.38) | 269710 (0.06)               | 1861615 (0.45) |  |  |
| STAT3  | Permanent cultured in<br>IL-6 vs. 1h restimula-<br>tion | 28582   | 3871 (0.13)    | 15204 (0.53)                | 8325 (0.29)    |  |  |
|        | Permanent cultured in<br>IL-6 vs. 13h withdrawal        | 53409   | 4704 (0.08)    | 27500 (0.51)                | 19349 (0.36)   |  |  |
|        | 1h IL-6 restimulation<br>vs. 13h withdrawal             | 118045  | 14868 (0.12)   | 37422 (0.31)                | 60273 (0.51)   |  |  |
|        |                                                         |         |                |                             |                |  |  |

Table S2: **Differentially expressed regions (DE-TARs)**. Overall number of significantly differentially expressed nucleotides (TileShuffle  $q < 0.005$ ) as well as number of significantly differentially expressed nucleotides in protein-coding exons (Gencode v12, Ensembl genes, UCSC genes or RefSeq genes), intergenic regions and in introns of known protein-coding genes.

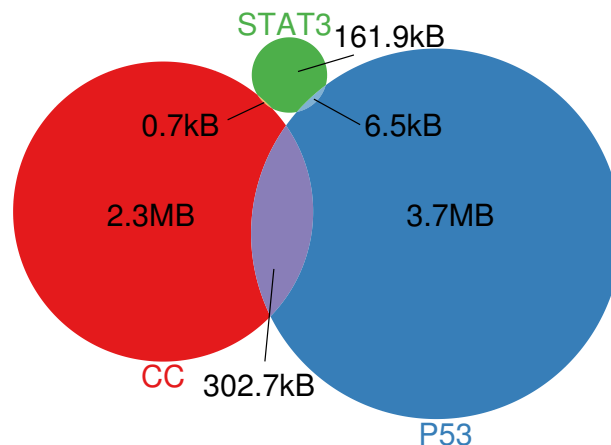

Figure S6: **Differentially expressed TARs (DE-TARs)**. Overall number of significantly differentially expressed nucleotides (TileShuffle  $q < 0.005$ ) and their nucleotide-wise overlaps between all three transcriptome-wide surveys.

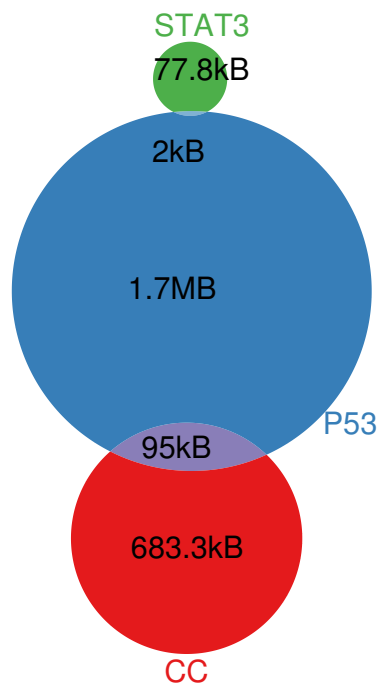

Figure S7: **Differentially expressed *bona fide* non-coding TARs in introns.** Number of significantly differentially expressed nucleotides (TileShuffle  $q < 0.005$ ) in introns of known protein-coding genes (Gencode v12, Ensembl genes, UCSC genes or RefSeq genes) and their nucleotide-wise overlaps between all three transcriptome-wide surveys.

### 3.2 FDR estimation using the nONCOchip custom array

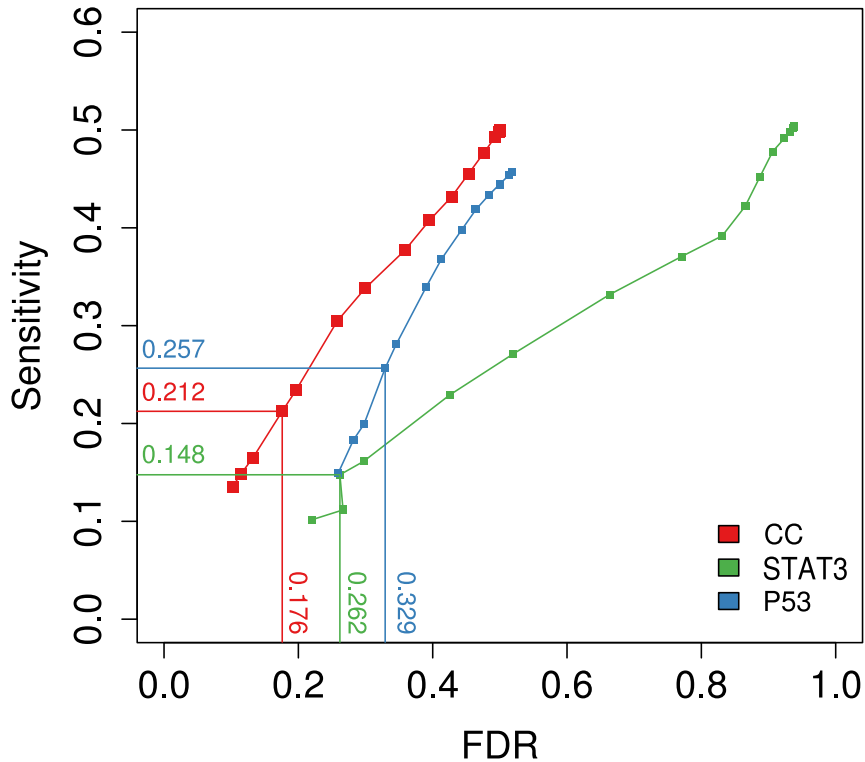

Figure S8: **FDR estimation using the nONCOchip custom array.** ROC curves showing sensitivity versus FDR of detecting differential expression with the tiling array approach. The nONCOchip custom array interrogates a significant subset of the differentially expressed intervals displayed in Figure 1D (see Supplemental Table S11 for detailed numbers). The nONCOchip was applied in biological triplicates to the following conditions: G0/G1 (CC), p53 induced/defunct p53 (p53), and INA-6 cells deprived from IL-6 for 13 hours/restimulated after 1h (STAT3). Subsequently, probes significantly differentially expressed were identified (see Materials and Methods). As already performed in [5], this set of RNAs was used as a “true” reference for estimating sensitivity and specificity of the tiling array experiment. Different points in the ROC curve are achieved by varying the  $q$  parameter of `TileShuffle` for differential expression analysis. Based on these data the  $q$  parameter has been set to  $q = 0.005$  to give an overall FDR between 18% and 33% for all three data sets.

### 3.3 Independent 3'UTR expression

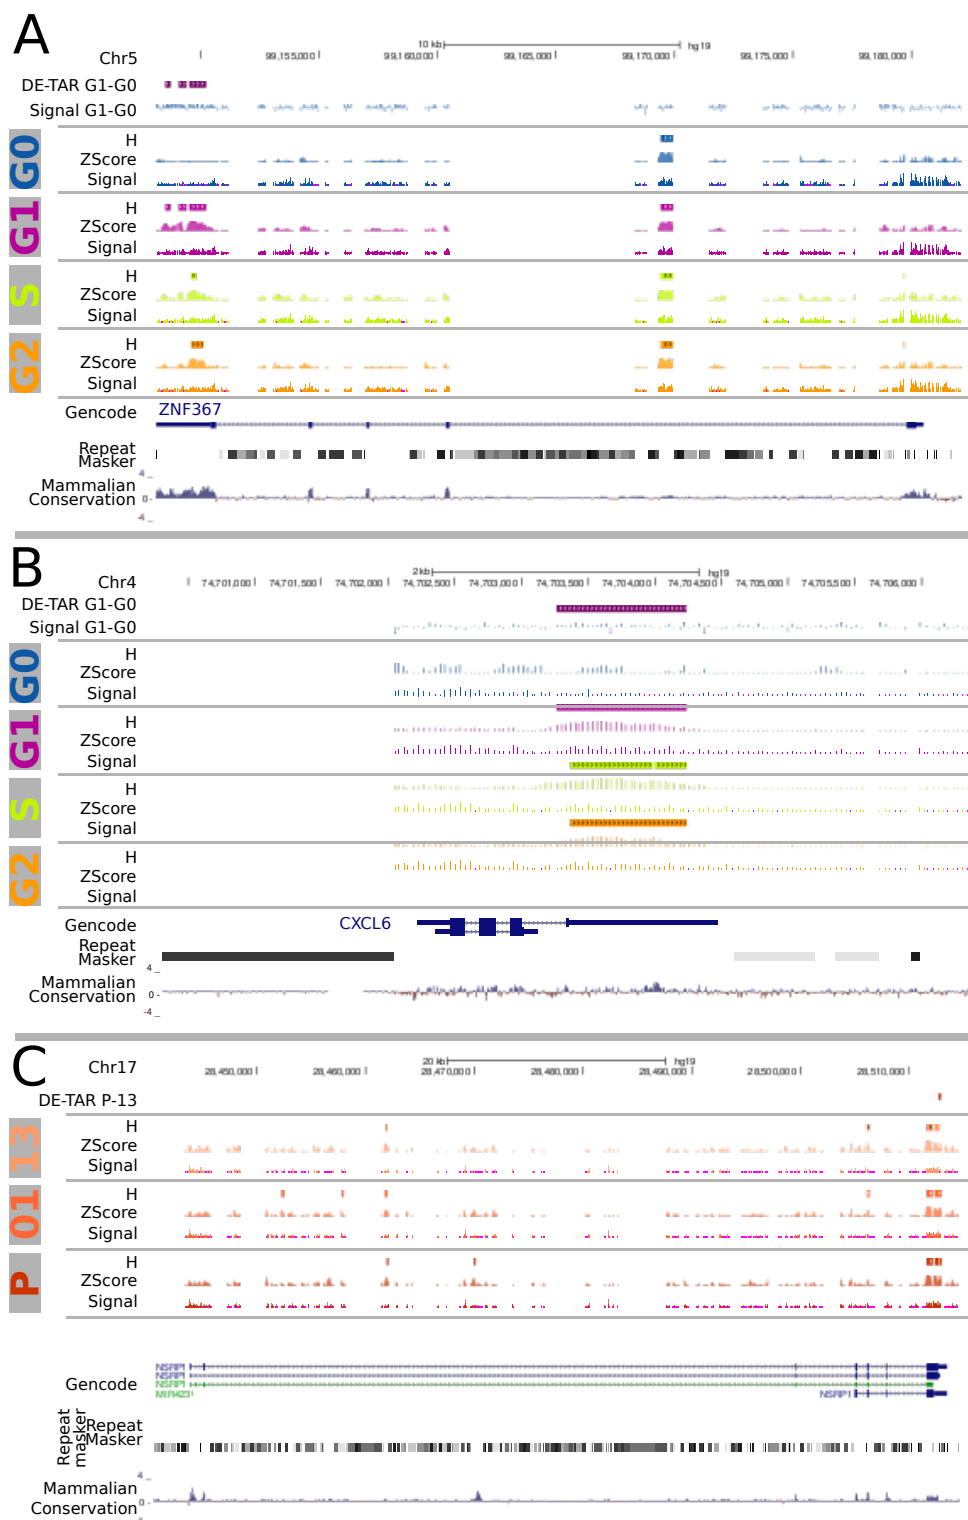

Figure S9: **Independent 3'UTR expression.** In approximately 400 cases, larger parts of a gene's 3'UTR are differentially expressed while the coding sequence is not. (A) shows the example ZNF 367 and (B) CXCL6. (C) CCDC55 (NSRP1) is a case where mainly the 3'UTR is expressed, but not differential.

|        |        | Gene        |       |       |            | Antisense Gene |             |          |           |
|--------|--------|-------------|-------|-------|------------|----------------|-------------|----------|-----------|
| Name   | Strand | DE-TARs     |       |       |            | Name           | Strand      | DE-TARs  | Expressed |
|        |        | 3'UTR       | 5'UTR | CDS   | intron     |                |             |          |           |
| NSRP1  | +      | 01-13       |       | 01-13 |            |                |             |          |           |
| SLC7A6 | +      | 01-13       |       |       | SLC7A6OS   | -              | 01-13       | 13, 1, P |           |
| ICAM1  | +      | 01-13, 13-P |       |       | CTD-2369P2 | -              | 01-13, 13-P | 1h, P    |           |
| KDSR   | -      | 01-13       |       |       |            |                |             |          |           |

**Table S3: Independent 3'UTR expression upon STAT3 activation.** The observed discrepancy between non-enriched CDS and 5'-UTRs versus enriched 3'-UTRs in STAT3-DE-TARs might reflect an independent expression or processing of 3'-UTRs. Applying a stringent filtering scheme interrogating (i) 3'UTR must not overlap any protein-coding exon (CDS), (ii) 3'UTR must be covered by DE-TARs in at least 20% of nucleotides, and (iii) the average `TileShuffle`  $z$ -score for expression of the 3'UTR must be twice as high as the  $z$ -score for corresponding CDS exons, resulted in four candidates with 3'UTR regulation independent of the protein-coding gene. Two 3'UTRs overlap with annotated antisense transcripts (`Gencode v12`) which points to regulation of the antisense transcript rather than to independent 3'UTR expression.

### 3.4 DE-TAR overlap with genomic annotation

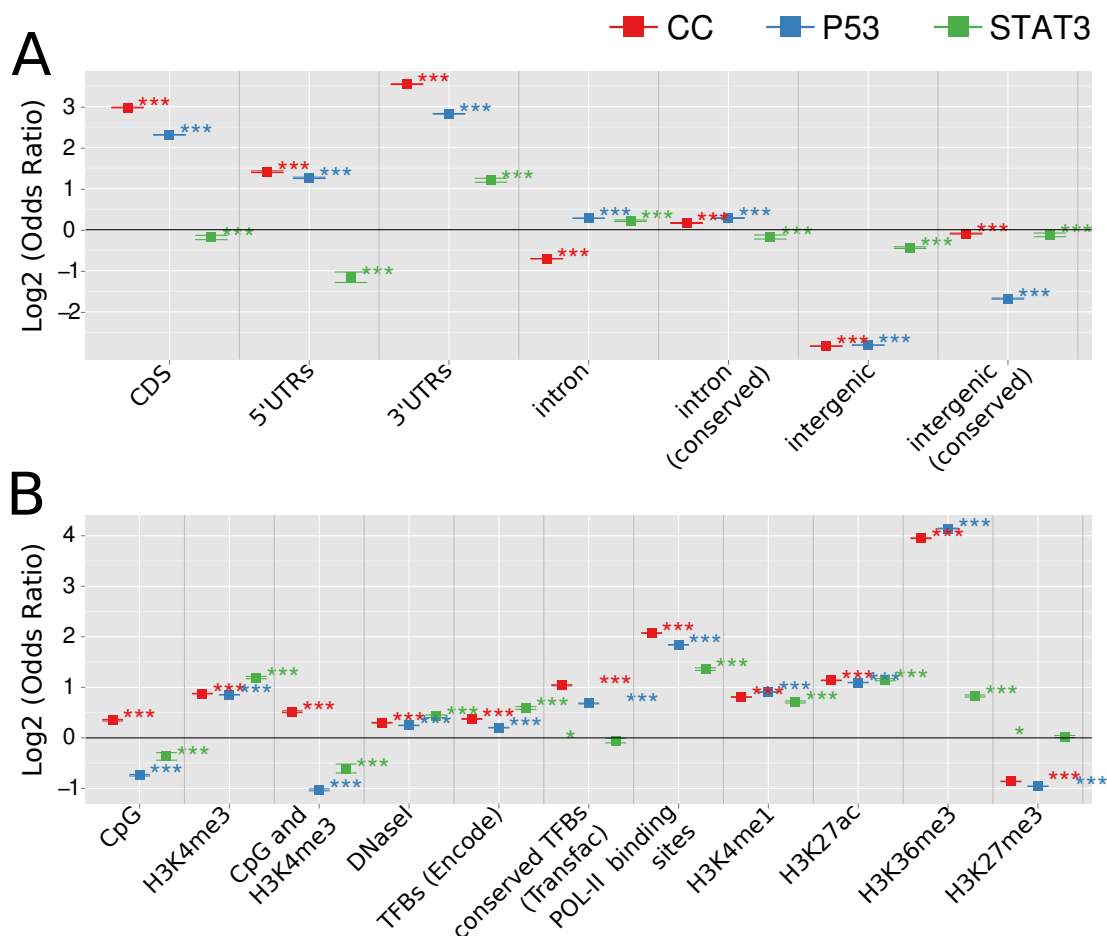

Figure S10: **DE-TAR overlap with genomic annotation.** Overlaps in nucleotides between DE-TARs and different annotation categories. Log<sub>2</sub> transformed odds ratios and their 95% confidence interval for the respective annotation dataset are shown (annotations are described in detail in Supplemental Table S28). To assess the significance of the observed overlap, 100 lists containing random intervals from the genome controlling for repeat content and DE-TAR length are sampled. Odds ratios of observed versus randomized relative overlaps are calculated and tested by Fisher's exact test for significant enrichment or depletion. \*\*\* indicates a p-value  $p < 0.001$  of the observed versus random nucleotide overlaps, \*\* a p-value  $p < 0.01$ , and \* a p-value  $p < 0.05$ , respectively. Results are shown for DE-TARs which overlap (A) annotated protein coding genes versus intergenic space based on Gencode release v12, and (B) putative promoter regions, transcription factor binding sites, polIII binding sites and epigenetically modified regions.

Table S4: **DE-TAR overlap with protein coding genes.** Overlaps in nucleotides between DE-TARs and annotated protein coding genes as well as intergenic space based on *Gencode* release v12. Annotation datasets are described in Supplemental Table S28. Overlaps are calculated by using the Bioconductor *genomeIntervals* package [6]. The significance of the observed overlap is assessed by generating a background (**BG**) of 100 random lists containing as much as random intervals from the human genome (hg19) than DE-TARs were identified. Random intervals are controlled for repeat content and DE-TAR length. Odds ratios of observed versus expected relative overlaps are calculated and tested by Fisher’s exact test for significant enrichment or depletion (see Materials and Methods). Column heading **Annotation** indicates annotation datasets for which overlap is computed, and **Survey** if overlap is for cell cycle (CC), p53 or STAT3 (IL-6) pathway. Remaining columns indicate the results (**Odds ratio**, **P-value**, and 95% confidence interval for odds ratio - **95% CI**) and the data (**DE-TARs**: number of overlapping or non-overlapping nucleotides of DE-TARs with annotation; **BG**: average number of overlapping or non-overlapping nucleotides of random intervals with annotation among 100 random lists) of Fisher’s exact test.

| Annotation                | Survey | Fisher’s exact test |           |                | overlap |            | no overlap |            |
|---------------------------|--------|---------------------|-----------|----------------|---------|------------|------------|------------|
|                           |        | Odds ratio          | P-value   | 95% CI         | DE-TARs | BG         | DE-TARs    | BG         |
| CDS                       | CC     | 7.88                | 0.00e+00  | [7.83, 7.93]   | 691846  | 113406.78  | 1993219    | 2573233.04 |
|                           | P53    | 4.97                | 0.00e+00  | [4.94, 4.99]   | 715884  | 167363.44  | 3378412    | 3922503.26 |
|                           | IL6    | 0.88                | 1.01e-12  | [0.85, 0.91]   | 5738    | 6529.13    | 163680     | 163331.07  |
| intergenic                | CC     | 0.14                | 0.00e+00  | [0.14, 0.14]   | 279104  | 1217176.17 | 2405961    | 1469463.65 |
|                           | P53    | 0.14                | 0.00e+00  | [0.14, 0.14]   | 435732  | 1862021.38 | 3658564    | 2227845.32 |
|                           | IL6    | 0.74                | 0.00e+00  | [0.73, 0.75]   | 65464   | 78121.30   | 103954     | 91738.9    |
| intergenic<br>(conserved) | CC     | 0.94                | 5.07e-62  | [0.93, 0.94]   | 132323  | 140866.19  | 2552742    | 2545773.63 |
|                           | P53    | 0.31                | 0.00e+00  | [0.31, 0.32]   | 68823   | 212292.36  | 4025473    | 3877574.34 |
|                           | IL6    | 0.92                | 4.71e-08  | [0.89, 0.95]   | 7841    | 8544.62    | 161577     | 161315.58  |
| introns                   | CC     | 0.61                | 0.00e+00  | [0.61, 0.61]   | 911084  | 1225247.42 | 1773981    | 1461392.4  |
|                           | P53    | 1.22                | 0.00e+00  | [1.21, 1.22]   | 2062161 | 1861055.49 | 2032135    | 2228811.21 |
|                           | IL6    | 1.16                | 2.14e-108 | [1.15, 1.18]   | 84059   | 77834.86   | 85359      | 92025.34   |
| intron<br>(conserved)     | CC     | 1.12                | 1.45e-168 | [1.11, 1.13]   | 131043  | 117640.97  | 2554022    | 2568998.85 |
|                           | P53    | 1.22                | 0.00e+00  | [1.21, 1.23]   | 213478  | 176729.33  | 3880818    | 3913137.37 |
|                           | IL6    | 0.88                | 2.19e-12  | [0.85, 0.92]   | 6371    | 7190.09    | 163047     | 162670.11  |
| 3’UTRs                    | CC     | 11.68               | 0.00e+00  | [11.60, 11.76] | 772100  | 89692.14   | 1912965    | 2596947.68 |
|                           | P53    | 7.08                | 0.00e+00  | [7.04, 7.12]   | 794681  | 134497.59  | 3299615    | 3955369.11 |
|                           | IL6    | 2.31                | 0.00e+00  | [2.23, 2.38]   | 11695   | 5290.21    | 157723     | 164569.99  |
| 5’UTRs                    | CC     | 2.66                | 0.00e+00  | [2.62, 2.70]   | 71971   | 27519.87   | 2613094    | 2659119.95 |
|                           | P53    | 2.40                | 0.00e+00  | [2.37, 2.43]   | 97974   | 41346.06   | 3996322    | 4048520.64 |
|                           | IL6    | 0.45                | 1.15e-77  | [0.41, 0.49]   | 730     | 1624.24    | 168688     | 168235.96  |

Table S5: **DE-TAR overlap with regulatory sites and epigenetically modified regions.** Overlaps in nucleotides between DE-TARs and putative promoter regions, transcription factor bindings sites and epigenetically modified regions. Annotation datasets are described in Supplemental Table S28. Overlaps are calculated by using the Bioconductor `genomeIntervals` package [6]. The significance of the observed overlap is assessed by generating a background (**BG**) of 100 random lists containing as much as random intervals from the human genome (hg19) than DE-TARs were identified. Random intervals are controlled for repeat content and DE-TAR length. Odds ratios of observed versus expected relative overlaps are calculated and tested by Fisher’s exact test for significant enrichment or depletion (see Materials and Methods). Column heading **Annotation** indicates annotation datasets for which overlap is computed, and **Survey** if overlap is for cell cycle (CC), p53 or STAT3 (IL-6) pathway. Remaining columns indicate the results (**Odds ratio**, **P-value**, and 95% confidence interval for odds ratio - **95% CI**) and the data (**DE-TARs**: number of overlapping or non-overlapping nucleotides of DE-TARs with annotation; **BG**: average number of overlapping or non-overlapping nucleotides of random intervals with annotation among 100 random lists) of Fisher’s exact test.

| Annotation      | Survey | Fisher’s exact test |           |               | overlap |            | no overlap |            |
|-----------------|--------|---------------------|-----------|---------------|---------|------------|------------|------------|
|                 |        | Odds ratio          | P-value   | 95% CI        | DE-TARs | BG         | DE-TARs    | BG         |
| CpG             | CC     | 1.28                | 0.00e+00  | [1.26, 1.29]  | 77215   | 60969.15   | 2607850    | 2625670.67 |
|                 | P53    | 0.60                | 0.00e+00  | [0.59, 0.61]  | 54228   | 89564.36   | 4040068    | 4000302.34 |
|                 | IL6    | 0.78                | 1.58e-22  | [0.74, 0.82]  | 2646    | 3405.58    | 166772     | 166454.62  |
| CpG and H3K4me3 | CC     | 1.43                | 0.00e+00  | [1.41, 1.45]  | 66321   | 46740.30   | 2618744    | 2639899.52 |
|                 | P53    | 0.49                | 0.00e+00  | [0.48, 0.50]  | 34535   | 69762.53   | 4059761    | 4020104.17 |
|                 | IL6    | 0.66                | 1.73e-43  | [0.62, 0.70]  | 1782    | 2705.22    | 167636     | 167154.98  |
| DNaseI          | CC     | 1.23                | 0.00e+00  | [1.22, 1.24]  | 503016  | 423909.11  | 2182049    | 2262730.71 |
|                 | P53    | 1.19                | 0.00e+00  | [1.18, 1.19]  | 741748  | 642687.34  | 3352548    | 3447179.36 |
|                 | IL6    | 1.35                | 4.83e-238 | [1.32, 1.37]  | 33823   | 26567.89   | 135595     | 143292.31  |
| H3K27ac         | CC     | 2.20                | 0.00e+00  | [2.19, 2.21]  | 1047799 | 605185.53  | 1637266    | 2081454.29 |
|                 | P53    | 2.14                | 0.00e+00  | [2.13, 2.14]  | 1561428 | 915764.87  | 2532868    | 3174101.83 |
|                 | IL6    | 2.22                | 0.00e+00  | [2.19, 2.25]  | 65466   | 37524.99   | 103952     | 132335.21  |
| H3k27me3        | CC     | 0.55                | 0.00e+00  | [0.55, 0.55]  | 1389000 | 1775246.93 | 1296065    | 911392.89  |
|                 | P53    | 0.51                | 0.00e+00  | [0.51, 0.52]  | 2039681 | 2693411.65 | 2054615    | 1396455.05 |
|                 | IL6    | 1.02                | 1.25e-02  | [1.00, 1.03]  | 112678  | 112282.79  | 56740      | 57577.41   |
| H3K36me3        | CC     | 15.46               | 0.00e+00  | [15.38,15.55] | 2519047 | 1330688.44 | 166018     | 1355951.38 |
|                 | P53    | 17.66               | 0.00e+00  | [17.58,17.74] | 3869404 | 2018061.43 | 224892     | 2071805.27 |
|                 | IL6    | 1.78                | 0.00e+00  | [1.75, 1.80]  | 106903  | 83320.06   | 62515      | 86540.14   |
| H3K4me1         | CC     | 1.75                | 0.00e+00  | [1.75, 1.76]  | 1659045 | 1289558.86 | 1026020    | 1397080.96 |
|                 | P53    | 1.88                | 0.00e+00  | [1.87, 1.88]  | 2587045 | 1953834.56 | 1507251    | 2136032.14 |
|                 | IL6    | 1.64                | 0.00e+00  | [1.61, 1.66]  | 102037  | 81646.76   | 67381      | 88213.44   |
| H3K4me3         | CC     | 1.84                | 0.00e+00  | [1.83, 1.84]  | 739183  | 460680.09  | 1945882    | 2225959.73 |
|                 | P53    | 1.81                | 0.00e+00  | [1.80, 1.81]  | 1100823 | 691851.60  | 2993473    | 3398015.1  |
|                 | IL6    | 2.29                | 0.00e+00  | [2.25, 2.33]  | 52862   | 28101.65   | 116556     | 141758.55  |
| POL-II          | CC     | 4.21                | 0.00e+00  | [4.19, 4.23]  | 1067581 | 364073.75  | 1617484    | 2322566.07 |
|                 | P53    | 3.58                | 0.00e+00  | [3.57, 3.59]  | 1457432 | 546846.35  | 2636864    | 3543020.35 |
|                 | IL6    | 2.57                | 0.00e+00  | [2.52, 2.61]  | 46853   | 22016.88   | 122565     | 147843.32  |
| TFBs (Transfac) | CC     | 2.06                | 0.00e+00  | [2.04, 2.07]  | 260450  | 133371.08  | 2424615    | 2553268.74 |
|                 | P53    | 1.60                | 0.00e+00  | [1.59, 1.61]  | 312822  | 200721.49  | 3781474    | 3889145.21 |
|                 | IL6    | 0.96                | 2.30e-02  | [0.93, 0.99]  | 7804    | 8105.31    | 161614     | 161754.89  |
| TFBs (Encode)   | CC     | 1.30                | 0.00e+00  | [1.29, 1.30]  | 422704  | 338458.03  | 2262361    | 2348181.79 |
|                 | P53    | 1.15                | 0.00e+00  | [1.15, 1.15]  | 580090  | 513351.52  | 3514206    | 3576515.18 |
|                 | IL6    | 1.51                | 0.00e+00  | [1.48, 1.54]  | 29775   | 21050.02   | 139643     | 148810.18  |



### 3.5 *Bona fide* non-coding DE-TARs overlap with genomic annotation

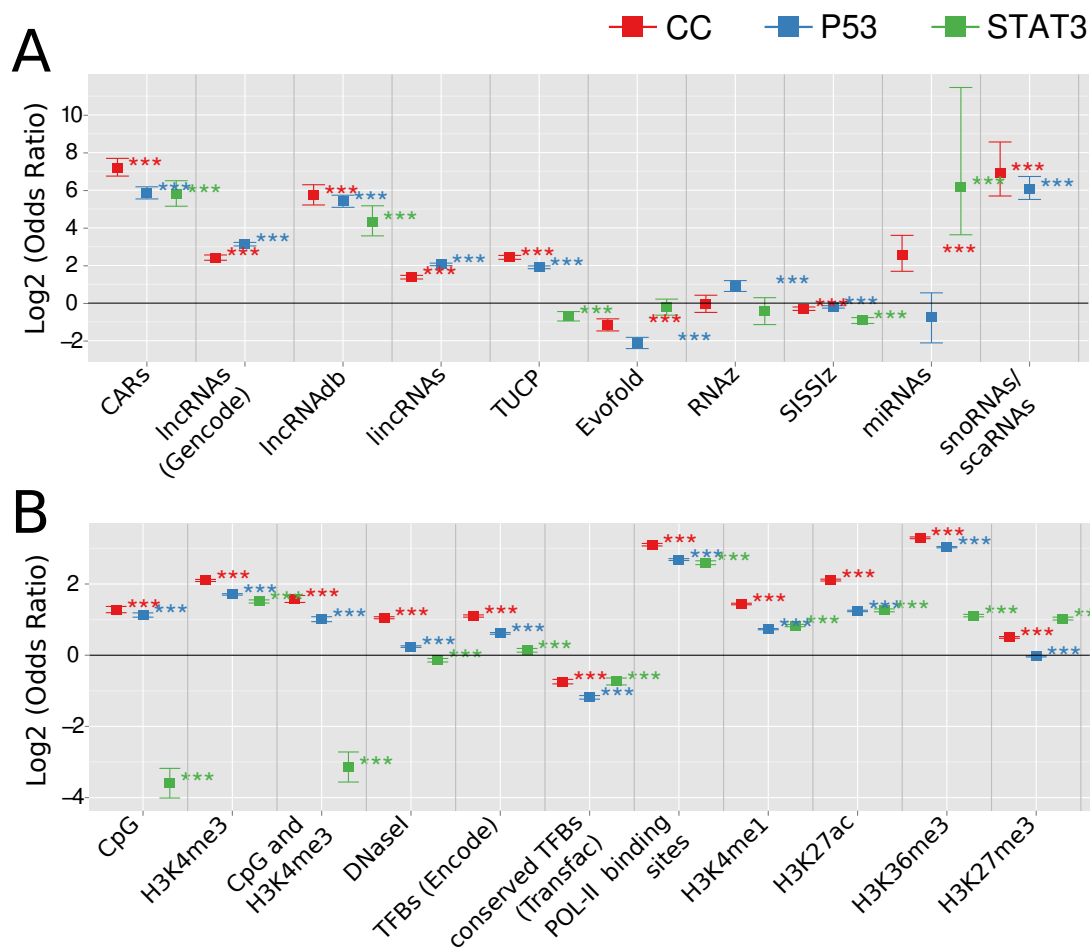

Figure S11: ***Bona fide* non-coding DE-TARs in intergenic space overlap with genomic annotation.** Overlaps in nucleotides between *bona fide* non-coding DE-TARs and different annotation categories. Log<sub>2</sub> transformed odds ratios and their 95% confidence interval for the respective annotation dataset are shown (annotations are described in detail in Supplemental Table S28). To assess the significance of the observed overlap, 100 lists containing random intervals from the genome controlling for repeat content and DE-TAR length are sampled. Odds ratios of observed versus randomized relative overlaps are calculated and tested by Fisher's exact test for significant enrichment or depletion. \*\*\* indicates a p-value  $p < 0.001$  of the observed versus random nucleotide overlaps, \*\* a p-value  $p < 0.01$ , and \* a p-value  $p < 0.05$ , respectively. Results are shown for *bona fide* non-coding DE-TARs in intergenic space which overlap (A) with several classes of experimentally verified and predicted ncRNAs, and (B) putative promoter regions, transcription factor binding sites, polII binding sites and epigenetically modified regions.

Table S6: **Intergenic *bona fide* non-coding DE-TAR overlap with known non-coding RNAs.**

Overlaps in nucleotides between intergenic *bona fide* non-coding DE-TARs and known non-coding RNAs. Annotation datasets are described in Supplemental Table S28. Overlaps are calculated by using the Bioconductor `genomeIntervals` package [6]. The significance of the observed overlap is assessed by generating a background (**BG**) of 100 random lists containing as much as random intervals from the human genome (hg19) than DE-TARs were identified. Random intervals are controlled for repeat content and DE-TAR length. Odds ratios of observed versus expected relative overlaps are calculated and tested by Fisher’s exact test for significant enrichment or depletion (see Materials and Methods). Column heading **Annotation** indicates annotation datasets for which overlap is computed, and **Survey** if overlap is for cell cycle (CC), p53 or STAT3 (IL-6) pathway. Remaining columns indicate the results (**Odds ratio**, **P-value**, and 95% confidence interval for odds ratio - **95% CI**) and the data (**DE-TARs**: number of overlapping or non-overlapping nucleotides of DE-TARs with annotation; **BG**: average number of overlapping or non-overlapping nucleotides of random intervals with annotation among 100 random lists) of Fisher’s exact test.

| Annotation            | Survey | Fisher’s exact test |           |                  | overlap |         | no overlap |           |
|-----------------------|--------|---------------------|-----------|------------------|---------|---------|------------|-----------|
|                       |        | Odds ratio          | P-value   | 95% CI           | DE-TARs | BG      | DE-TARs    | BG        |
| CARs<br>(intergenic)  | CC     | 146.66              | 0.00e+00  | [107.68, 206.83] | 5641    | 39.84   | 138731     | 144152.03 |
|                       | P53    | 57.71               | 0.00e+00  | [46.43, 72.57]   | 4661    | 82.08   | 265049     | 269077.68 |
|                       | IL6    | 55.08               | 3.40e-293 | [35.49, 90.81]   | 1094    | 20.16   | 61875      | 62310.83  |
| Evofold               | CC     | 0.45                | 6.40e-14  | [0.36, 0.56]     | 119     | 263.81  | 144253     | 143928.06 |
|                       | P53    | 0.23                | 1.74e-58  | [0.19, 0.28]     | 117     | 504.17  | 269593     | 268655.59 |
|                       | IL6    | 0.86                | 3.47e-01  | [0.64, 1.16]     | 89      | 102.17  | 62880      | 62228.82  |
| lincRNAs              | CC     | 2.60                | 3.82e-194 | [2.43, 2.78]     | 3144    | 1224.27 | 141228     | 142967.6  |
|                       | P53    | 4.16                | 0.00e+00  | [3.98, 4.36]     | 9302    | 2289.35 | 260408     | 266870.41 |
|                       | IL6    | 0.00                | 2.21e-164 | [0.00, 0.01]     | 0       | 537.94  | 62969      | 61793.05  |
| lncRNAdb              | CC     | 52.97               | 0.00e+00  | [37.18, 78.33]   | 1626    | 30.57   | 142746     | 144161.3  |
|                       | P53    | 42.35               | 0.00e+00  | [34.07, 53.24]   | 3519    | 83.87   | 266191     | 269075.89 |
|                       | IL6    | 19.96               | 4.39e-70  | [11.91, 36.10]   | 301     | 15.01   | 62668      | 62315.98  |
| lncRNAs<br>(Gencode)  | CC     | 5.34                | 0.00e+00  | [4.85, 5.89]     | 2629    | 499.23  | 141743     | 143692.64 |
|                       | P53    | 8.77                | 0.00e+00  | [8.22, 9.36]     | 8894    | 1042.81 | 260816     | 268116.95 |
|                       | IL6    | 0.00                | 4.80e-69  | [0.00, 0.02]     | 0       | 225.07  | 62969      | 62105.92  |
| RNAz                  | CC     | 0.97                | 8.77e-01  | [0.71, 1.34]     | 82      | 84.02   | 144290     | 144107.85 |
|                       | P53    | 1.87                | 1.17e-10  | [1.54, 2.29]     | 291     | 155.21  | 269419     | 269004.55 |
|                       | IL6    | 0.75                | 2.40e-01  | [0.45, 1.22]     | 31      | 41.33   | 62938      | 62289.66  |
| miRNAs                | CC     | 5.99                | 1.39e-11  | [3.23, 12.14]    | 72      | 11.94   | 144300     | 144179.93 |
|                       | P53    | 0.60                | 2.29e-01  | [0.23, 1.46]     | 9       | 15.43   | 269701     | 269144.33 |
|                       | IL6    | 71.35               | 1.64e-20  | [12.40, 2815.52] | 72      | 0.78    | 62897      | 62330.21  |
| snoRNAs or<br>scaRNAs | CC     | 121.55              | 9.49e-173 | [51.72, 378.44]  | 606     | 4.54    | 143766     | 144187.33 |
|                       | P53    | 67.97               | 0.00e+00  | [45.56, 106.17]  | 1625    | 23.57   | 268085     | 269136.19 |
|                       | IL6    | 0.00                | 3.75e-03  | [0.00, 0.58]     | 0       | 7.76    | 62969      | 62323.23  |
| SISSlz                | CC     | 0.81                | 1.28e-10  | [0.76, 0.87]     | 1804    | 2205.88 | 142568     | 141985.99 |
|                       | P53    | 0.87                | 7.34e-10  | [0.83, 0.91]     | 3694    | 4229.90 | 266016     | 264929.86 |
|                       | IL6    | 0.53                | 2.06e-33  | [0.47, 0.59]     | 526     | 980.20  | 62443      | 61350.79  |
| TUCP                  | CC     | 5.39                | 0.00e+00  | [5.02, 5.80]     | 4709    | 896.27  | 139663     | 143295.6  |
|                       | P53    | 3.74                | 0.00e+00  | [3.55, 3.94]     | 7125    | 1939.15 | 262585     | 267220.61 |
|                       | IL6    | 0.62                | 2.07e-08  | [0.52, 0.73]     | 216     | 346.11  | 62753      | 61984.88  |

**Table S7: Intergenic *bona fide* non-coding DE-TAR overlap with regulatory sites and epigenetically modified regions.** Overlaps in nucleotides between intergenic *bona fide* non-coding DE-TARs and putative promoter regions, transcription factor bindings sites and epigenetically modified regions. Annotation datasets are described in Supplemental Table S28. Overlaps are calculated by using the Bioconductor `genomeIntervals` package [6]. The significance of the observed overlap is assessed by generating a background (**BG**) of 100 random lists containing as much as random intervals from the human genome (hg19) than DE-TARs were identified. Random intervals are controlled for repeat content and DE-TAR length. Odds ratios of observed versus expected relative overlaps are calculated and tested by Fisher’s exact test for significant enrichment or depletion (see Materials and Methods). Column heading **Annotation** indicates annotation datasets for which overlap is computed, and **Survey** if overlap is for cell cycle (CC), p53 or STAT3 (IL-6) pathway. Remaining columns indicate the results (**Odds ratio**, **P-value**, and **95% confidence interval for odds ratio - 95% CI**) and the data (**DE-TARs**: number of overlapping or non-overlapping nucleotides of DE-TARs with annotation; **BG**: average number of overlapping or non-overlapping nucleotides of random intervals with annotation among 100 random lists) of Fisher’s exact test.

| Annotation      | Survey | Fisher’s exact test |           |               | overlap |           | no overlap |           |
|-----------------|--------|---------------------|-----------|---------------|---------|-----------|------------|-----------|
|                 |        | Odds ratio          | P-value   | 95% CI        | DE-TARs | BG        | DE-TARs    | BG        |
| CpG             | CC     | 2.43                | 2.30e-198 | [2.29, 2.59]  | 3603    | 1501.97   | 140769     | 142689.9  |
|                 | P53    | 2.19                | 0.00e+00  | [2.10, 2.28]  | 7121    | 3296.56   | 262589     | 265863.2  |
|                 | IL6    | 0.08                | 1.19e-128 | [0.06, 0.11]  | 54      | 633.60    | 62915      | 61697.39  |
| CpG and H3K4me3 | CC     | 2.99                | 9.87e-257 | [2.79, 3.20]  | 3401    | 1154.95   | 140971     | 143036.92 |
|                 | P53    | 2.02                | 1.95e-192 | [1.92, 2.12]  | 5110    | 2553.57   | 264600     | 266606.19 |
|                 | IL6    | 0.11                | 1.43e-83  | [0.09, 0.15]  | 54      | 463.84    | 62915      | 61867.15  |
| DNaseI          | CC     | 2.07                | 0.00e+00  | [2.03, 2.12]  | 33570   | 18378.60  | 110802     | 125813.27 |
|                 | P53    | 1.18                | 5.41e-100 | [1.17, 1.20]  | 39834   | 34389.84  | 229876     | 234769.92 |
|                 | IL6    | 0.91                | 1.30e-08  | [0.88, 0.94]  | 7416    | 7999.10   | 55553      | 54331.89  |
| H3K27ac         | CC     | 4.32                | 0.00e+00  | [4.24, 4.40]  | 61253   | 21017.48  | 83119      | 123174.39 |
|                 | P53    | 2.37                | 0.00e+00  | [2.34, 2.40]  | 77119   | 38931.89  | 192591     | 230227.87 |
|                 | IL6    | 2.40                | 0.00e+00  | [2.33, 2.46]  | 18648   | 9313.25   | 44321      | 53017.74  |
| H3k27me3        | CC     | 1.41                | 0.00e+00  | [1.39, 1.44]  | 111922  | 102259.12 | 32450      | 41932.75  |
|                 | P53    | 0.98                | 1.88e-04  | [0.97, 0.99]  | 189126  | 189991.37 | 80584      | 79168.39  |
|                 | IL6    | 2.04                | 0.00e+00  | [1.99, 2.10]  | 52672   | 44553.31  | 10297      | 17777.68  |
| H3K36me3        | CC     | 9.83                | 0.00e+00  | [9.67, 10.00] | 111081  | 36530.86  | 33291      | 107661.01 |
|                 | P53    | 8.19                | 0.00e+00  | [8.09, 8.29]  | 198477  | 68313.26  | 71233      | 200846.5  |
|                 | IL6    | 2.16                | 0.00e+00  | [2.11, 2.21]  | 27053   | 16104.44  | 35916      | 46226.55  |
| H3K4me1         | CC     | 2.71                | 0.00e+00  | [2.67, 2.75]  | 90407   | 55095.49  | 53965      | 89096.38  |
|                 | P53    | 1.66                | 0.00e+00  | [1.64, 1.68]  | 136575  | 102780.36 | 133135     | 166379.4  |
|                 | IL6    | 1.78                | 0.00e+00  | [1.74, 1.82]  | 33473   | 24250.92  | 29496      | 38080.07  |
| H3K4me3         | CC     | 4.29                | 0.00e+00  | [4.20, 4.37]  | 49607   | 15688.67  | 94765      | 128503.2  |
|                 | P53    | 3.27                | 0.00e+00  | [3.22, 3.32]  | 77639   | 29630.58  | 192071     | 239529.18 |
|                 | IL6    | 2.85                | 0.00e+00  | [2.76, 2.94]  | 16635   | 6978.55   | 46334      | 55352.44  |
| POL-II          | CC     | 8.60                | 0.00e+00  | [8.39, 8.81]  | 51059   | 8626.30   | 93313      | 135565.57 |
|                 | P53    | 6.44                | 0.00e+00  | [6.32, 6.56]  | 78295   | 16078.41  | 191415     | 253081.35 |
|                 | IL6    | 6.06                | 0.00e+00  | [5.83, 6.29]  | 17439   | 3706.56   | 45530      | 58624.43  |
| TFBs (Transfac) | CC     | 0.60                | 3.17e-120 | [0.57, 0.62]  | 3305    | 5436.41   | 141067     | 138755.46 |
|                 | P53    | 0.44                | 0.00e+00  | [0.42, 0.46]  | 4588    | 10179.23  | 265122     | 258980.53 |
|                 | IL6    | 0.60                | 1.39e-52  | [0.56, 0.64]  | 1441    | 2343.18   | 61528      | 59987.81  |
| TFBs (Encode)   | CC     | 2.15                | 0.00e+00  | [2.10, 2.19]  | 27198   | 14079.38  | 117174     | 130112.49 |
|                 | P53    | 1.53                | 0.00e+00  | [1.50, 1.56]  | 38275   | 26262.47  | 231435     | 242897.29 |
|                 | IL6    | 1.10                | 2.38e-07  | [1.06, 1.14]  | 6903    | 6273.74   | 56066      | 56057.25  |

**Table S8: Intronic *bona fide* non-coding DE-TAR overlap with known non-coding RNAs.** Overlaps in nucleotides between intronic *bona fide* non-coding DE-TARs and known non-coding RNAs. Annotation datasets are described in Supplemental Table S28. Overlaps are calculated by using the Bioconductor `genomeIntervals` package [6]. The significance of the observed overlap is assessed by generating a background (**BG**) of 100 random lists containing as much as random intervals from the human genome (hg19) than DE-TARs were identified. Random intervals are controlled for repeat content and DE-TAR length. Odds ratios of observed versus expected relative overlaps are calculated and tested by Fisher’s exact test for significant enrichment or depletion (see Materials and Methods). Column heading **Annotation** indicates annotation datasets for which overlap is computed, and **Survey** if overlap is for cell cycle (CC), p53 or STAT3 (IL-6) pathway. Remaining columns indicate the results (**Odds ratio**, **P-value**, and 95% confidence interval for odds ratio - **95% CI**) and the data (**DE-TARs**: number of overlapping or non-overlapping nucleotides of DE-TARs with annotation; **BG**: average number of overlapping or non-overlapping nucleotides of random intervals with annotation among 100 random lists) of Fisher’s exact test.

| Annotation            | Survey | Fisher’s exact test |           |               | overlap |          | no overlap |            |
|-----------------------|--------|---------------------|-----------|---------------|---------|----------|------------|------------|
|                       |        | Odds ratio          | P-value   | 95% CI        | DE-TARs | BG       | DE-TARs    | BG         |
| CARs<br>(intron)      | CC     | 63.06               | 0.00e+00  | [60.36,65.98] | 107043  | 1965.59  | 662053     | 767356.04  |
|                       | P53    | 22.76               | 0.00e+00  | [22.13,23.42] | 111823  | 5198.03  | 1749792    | 1850772.97 |
|                       | IL6    | 1.20                | 4.74e-02  | [1.00, 1.44]  | 270     | 223.60   | 78835      | 78384.63   |
| Evofold               | CC     | 0.43                | 3.96e-55  | [0.38, 0.48]  | 445     | 1039.95  | 768651     | 768281.68  |
|                       | P53    | 0.71                | 7.23e-35  | [0.67, 0.75]  | 2158    | 3035.82  | 1859457    | 1852935.18 |
|                       | IL6    | 0.82                | 1.80e-01  | [0.62, 1.09]  | 91      | 110.41   | 79014      | 78497.82   |
| lincRNAs              | CC     | 1.96                | 3.74e-28  | [1.73, 2.22]  | 750     | 382.52   | 768346     | 768939.11  |
|                       | P53    | 0.93                | 1.09e-01  | [0.85, 1.02]  | 896     | 963.21   | 1860719    | 1855007.79 |
|                       | IL6    | 0.00                | 3.21e-12  | [0.00, 0.10]  | 0       | 38.35    | 79105      | 78569.88   |
| lncRNadb              | CC     | 1.96                | 3.94e-13  | [1.62, 2.38]  | 327     | 166.89   | 768769     | 769154.74  |
|                       | P53    | 10.18               | 0.00e+00  | [9.14,11.37]  | 3709    | 363.73   | 1857906    | 1855607.27 |
|                       | IL6    | 0.00                | 3.81e-03  | [0.00, 0.58]  | 0       | 8.27     | 79105      | 78599.96   |
| PINs                  | CC     | 6.91                | 0.00e+00  | [6.59, 7.25]  | 13656   | 2007.16  | 755440     | 767314.47  |
|                       | P53    | 4.77                | 0.00e+00  | [4.61, 4.94]  | 18935   | 3986.98  | 1842680    | 1851984.02 |
|                       | IL6    | 2.04                | 5.24e-17  | [1.71, 2.43]  | 399     | 195.14   | 78706      | 78413.09   |
| RNAz                  | CC     | 0.45                | 2.19e-28  | [0.39, 0.53]  | 265     | 583.72   | 768831     | 768737.91  |
|                       | P53    | 1.14                | 1.16e-03  | [1.05, 1.23]  | 1409    | 1236.88  | 1860206    | 1854734.12 |
|                       | IL6    | 0.65                | 5.90e-02  | [0.40, 1.03]  | 32      | 49.36    | 79073      | 78558.87   |
| miRNAs                | CC     | 1.47                | 6.42e-02  | [0.96, 2.29]  | 56      | 38.27    | 769040     | 769283.36  |
|                       | P53    | 0.49                | 7.34e-06  | [0.35, 0.68]  | 56      | 113.53   | 1861559    | 1855857.47 |
|                       | IL6    | 0.00                | 1.53e-02  | [0.00, 0.84]  | 0       | 5.63     | 79105      | 78602.6    |
| snoRNAs or<br>scaRNAs | CC     | 3.22                | 5.77e-09  | [2.08, 5.11]  | 90      | 27.61    | 769006     | 769294.02  |
|                       | P53    | 12.02               | 4.35e-138 | [9.17,16.04]  | 687     | 56.68    | 1860928    | 1855914.32 |
|                       | IL6    | 0.00                | 1.24e-01  | [0.00, 2.41]  | 0       | 2.93     | 79105      | 78605.3    |
| SISSlz                | CC     | 0.74                | 1.67e-115 | [0.72, 0.76]  | 10110   | 13598.05 | 758986     | 755723.58  |
|                       | P53    | 0.73                | 0.00e+00  | [0.71, 0.74]  | 24010   | 32823.03 | 1837605    | 1823147.97 |
|                       | IL6    | 1.13                | 8.43e-04  | [1.05, 1.22]  | 1560    | 1371.42  | 77545      | 77236.81   |
| TINs                  | CC     | 1.93                | 0.00e+00  | [1.89, 1.98]  | 24770   | 13021.62 | 744326     | 756300.01  |
|                       | P53    | 2.29                | 0.00e+00  | [2.26, 2.32]  | 73035   | 32556.82 | 1788580    | 1823414.18 |
|                       | IL6    | 1.00                | 9.85e-01  | [0.93, 1.08]  | 1396    | 1385.97  | 77709      | 77222.26   |
| TUCP                  | CC     | 1.30                | 8.52e-04  | [1.11, 1.52]  | 376     | 289.78   | 768720     | 769031.85  |
|                       | P53    | 0.05                | 4.24e-148 | [0.03, 0.07]  | 30      | 630.87   | 1861585    | 1855340.13 |
|                       | IL6    | 0.00                | 3.40e-09  | [0.00, 0.14]  | 0       | 28.37    | 79105      | 78579.86   |

Table S9: **Intronic *bona fide* non-coding DE-TAR overlap with regulatory sites and epigenetically modified regions.** Overlaps in nucleotides between intronic *bona fide* non-coding DE-TARs and putative promoter regions, transcription factor bindings sites and epigenetically modified regions. Annotation datasets are described in Supplemental Table S28. Overlaps are calculated by using the Bioconductor `genomeIntervals` package [6]. The significance of the observed overlap is assessed by generating a background (**BG**) of 100 random lists containing as much as random intervals from the human genome (hg19) than DE-TARs were identified. Random intervals are controlled for repeat content and DE-TAR length. Odds ratios of observed versus expected relative overlaps are calculated and tested by Fisher’s exact test for significant enrichment or depletion (see Materials and Methods). Column heading **Annotation** indicates annotation datasets for which overlap is computed, and **Survey** if overlap is for cell cycle (CC), p53 or STAT3 (IL-6) pathway. Remaining columns indicate the results (**Odds ratio**, **P-value**, and 95% confidence interval for odds ratio - **95% CI**) and the data (**DE-TARs**: number of overlapping or non-overlapping nucleotides of DE-TARs with annotation; **BG**: average number of overlapping or non-overlapping nucleotides of random intervals with annotation among 100 random lists) of Fisher’s exact test.

| Annotation      | Survey | Fisher’s exact test |           |               | overlap |            | no overlap |            |
|-----------------|--------|---------------------|-----------|---------------|---------|------------|------------|------------|
|                 |        | Odds ratio          | P-value   | 95% CI        | DE-TARs | BG         | DE-TARs    | BG         |
| CpG             | CC     | 0.70                | 6.50e-92  | [0.68, 0.73]  | 5511    | 7847.24    | 763585     | 761474.39  |
|                 | P53    | 0.69                | 2.43e-236 | [0.68, 0.71]  | 13631   | 19515.52   | 1847984    | 1836455.48 |
|                 | IL6    | 0.65                | 3.37e-15  | [0.58, 0.72]  | 537     | 821.20     | 78568      | 77787.03   |
| CpG and H3K4me3 | CC     | 0.79                | 4.12e-35  | [0.76, 0.82]  | 4946    | 6250.06    | 764150     | 763071.57  |
|                 | P53    | 0.42                | 0.00e+00  | [0.41, 0.43]  | 6304    | 14947.42   | 1855311    | 1841023.58 |
|                 | IL6    | 0.00                | 5.82e-197 | [0.00, 0.01]  | 0       | 647.30     | 79105      | 77960.93   |
| DNaseI          | CC     | 1.36                | 0.00e+00  | [1.35, 1.37]  | 167249  | 130622.10  | 601847     | 638699.53  |
|                 | P53    | 1.28                | 0.00e+00  | [1.27, 1.29]  | 393312  | 320879.54  | 1468303    | 1535091.46 |
|                 | IL6    | 1.44                | 2.47e-189 | [1.41, 1.48]  | 18609   | 13804.38   | 60496      | 64803.85   |
| H3K27ac         | CC     | 2.45                | 0.00e+00  | [2.43, 2.47]  | 364853  | 207181.01  | 404243     | 562140.62  |
|                 | P53    | 2.27                | 0.00e+00  | [2.26, 2.27]  | 851864  | 503676.57  | 1009751    | 1352294.43 |
|                 | IL6    | 2.05                | 0.00e+00  | [2.01, 2.09]  | 34893   | 21844.10   | 44212      | 56764.13   |
| H3k27me3        | CC     | 0.78                | 0.00e+00  | [0.78, 0.79]  | 443341  | 488349.40  | 325755     | 280972.23  |
|                 | P53    | 0.73                | 0.00e+00  | [0.73, 0.73]  | 1048757 | 1185976.83 | 812858     | 669994.17  |
|                 | IL6    | 0.67                | 0.00e+00  | [0.66, 0.68]  | 43241   | 50519.10   | 35864      | 28089.13   |
| H3K36me3        | CC     | 10.32               | 0.00e+00  | [10.20,10.44] | 731877  | 504529.61  | 37219      | 264792.02  |
|                 | P53    | 14.91               | 0.00e+00  | [14.78,15.04] | 1797078 | 1208756.46 | 64537      | 647214.54  |
|                 | IL6    | 1.22                | 3.47e-77  | [1.20, 1.25]  | 55265   | 51475.71   | 23840      | 27132.52   |
| H3K4me1         | CC     | 2.08                | 0.00e+00  | [2.07, 2.10]  | 546933  | 416652.84  | 222163     | 352668.79  |
|                 | P53    | 2.25                | 0.00e+00  | [2.24, 2.26]  | 1363174 | 1017808.49 | 498441     | 838162.51  |
|                 | IL6    | 1.37                | 7.52e-205 | [1.34, 1.40]  | 49582   | 43325.43   | 29523      | 35282.8    |
| H3K4me3         | CC     | 2.02                | 0.00e+00  | [2.01, 2.04]  | 243866  | 143566.92  | 525230     | 625754.71  |
|                 | P53    | 1.97                | 0.00e+00  | [1.96, 1.98]  | 592117  | 355839.29  | 1269498    | 1500131.71 |
|                 | IL6    | 2.06                | 0.00e+00  | [2.01, 2.10]  | 26043   | 15144.67   | 53062      | 63463.56   |
| POL-II          | CC     | 3.76                | 0.00e+00  | [3.73, 3.79]  | 292669  | 107961.14  | 476427     | 661360.49  |
|                 | P53    | 2.96                | 0.00e+00  | [2.95, 2.98]  | 606671  | 260196     | 1254944    | 1595775    |
|                 | IL6    | 1.52                | 9.20e-213 | [1.48, 1.56]  | 15934   | 11193.32   | 63171      | 67414.91   |
| TFBs (Transfac) | CC     | 0.86                | 2.06e-65  | [0.84, 0.87]  | 23024   | 26779.83   | 746072     | 742541.8   |
|                 | P53    | 0.85                | 3.36e-168 | [0.85, 0.86]  | 59494   | 69032.83   | 1802121    | 1786938.17 |
|                 | IL6    | 1.06                | 4.23e-02  | [1.00, 1.11]  | 3034    | 2861.91    | 76071      | 75746.32   |
| TFBs (Encode)   | CC     | 1.24                | 0.00e+00  | [1.23, 1.25]  | 117394  | 97453.82   | 651702     | 671867.81  |
|                 | P53    | 1.21                | 0.00e+00  | [1.20, 1.22]  | 281104  | 237620.77  | 1580511    | 1618350.23 |
|                 | IL6    | 1.55                | 1.81e-218 | [1.51, 1.59]  | 14893   | 10239.14   | 64212      | 68369.09   |

Table S10: LncRNAs with known function overlapped by *bona fide* non-coding DE-TARs.

| Survey    | LncRNA    | Role                                                                                                                 | Reference |
|-----------|-----------|----------------------------------------------------------------------------------------------------------------------|-----------|
| CC, STAT3 | MIAT1     | associated with myocardial infarction; modulates Oct4 levels in embryonal stem cells                                 | [7]       |
| CC        | MALAT1    | associated with metastasis in lung adenocarcinoma                                                                    | [8, 9]    |
| CC        | MEG3      | tumor suppressor expressed imprinted locus; frequently downregulated in primary tumors                               | [10]      |
| P53       | Cyrano    | antisense to tumor drug target OIP5; interference with neuronal development in zebra fish                            | [11, 12]  |
| P53       | ZNFX1-AS1 | potential marker for breast cancer                                                                                   | [13]      |
| P53       | HOTAIRM1  | regulator of HOXA1 cluster gene expression in myelogenesis                                                           | [14]      |
| P53       | HOTTIP    | activator of HOXA1 gene expression acting by promoting H3K4 trimethylation                                           | [15]      |
| P53       | GAS5      | pleiotropic, associated with growth arrest; some but not all transcript variants have been found to induce apoptosis | [16, 17]  |
| STAT3     | TMEVPG1   | regulator of interferon gamma-expression in T cells                                                                  | [18, 19]  |

## 4 Representation of TARs and DE-TARs on nONCOchip custom array

|       | Number of TARs | Fraction of TARs |
|-------|----------------|------------------|
|       | TARs           |                  |
| CC    | 15816          | 0.09             |
| P53   | 16673          | 0.09             |
| STAT3 | 13283          | 0.08             |
|       | DE-TARs        |                  |
| CC    | 4336           | 0.27             |
| P53   | 6351           | 0.25             |
| STAT3 | 385            | 0.31             |

Table S11: **Representation of TARs and DE-TARs on custom microarray.** Number and fraction of significantly expressed tiling array regions (TARs) and significantly differentially expressed tiling array regions (DE-TARs) which overlap at least one probe on the custom microarray. Each probe overlapping to at least 95% (i.e. 57 nucleotides) with an tiling array region is counted.

## 5 MacroRNAs

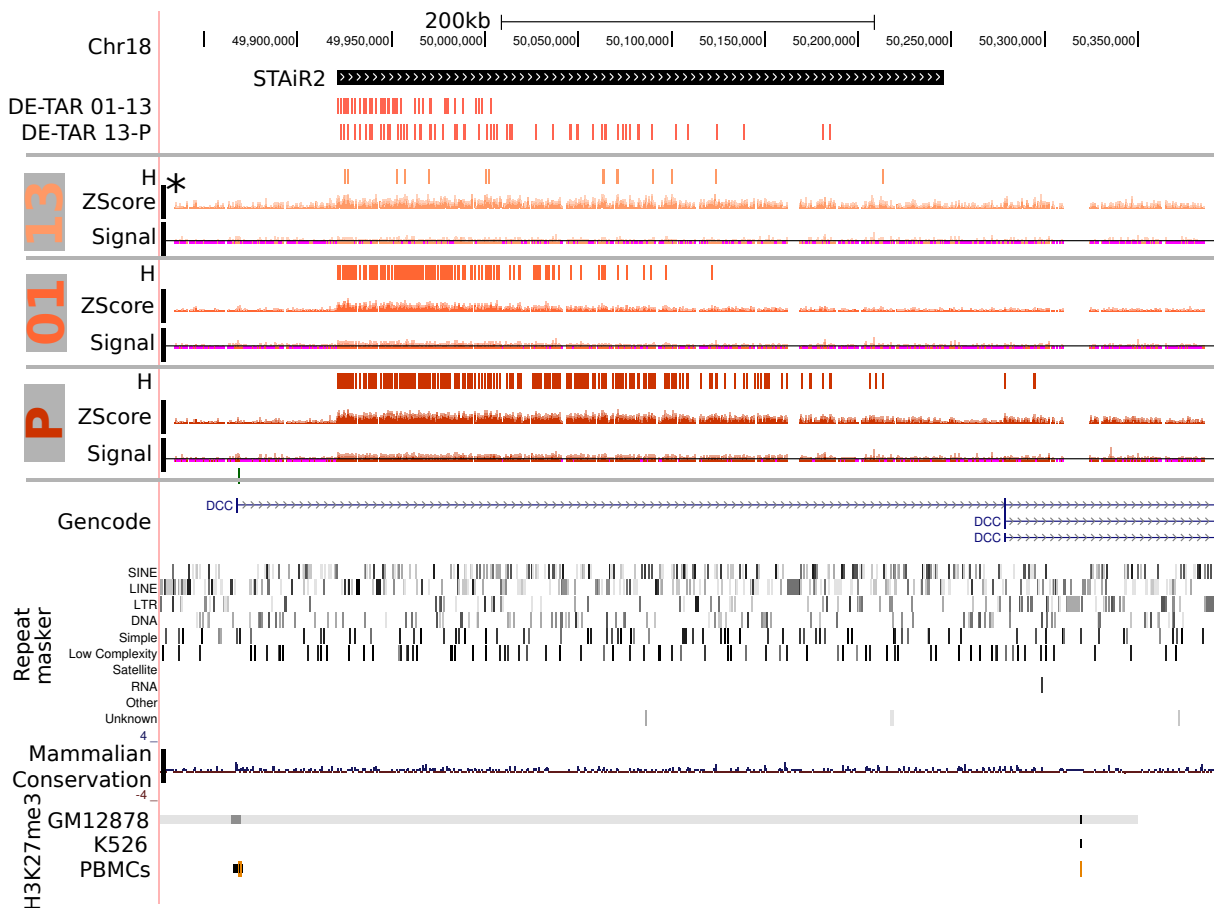

Figure S12: **STAT3-induced RNA 2 (STAiR2)**. INA6 cells were cultured in absence of IL-6 for 13h (13), restimulated for 1h (01), or permanently grown in presence of IL-6 (P) and RNA expression was analyzed using tiling arrays. TileShuffle identified strong differential expression between P and 13 states over a range of up to 200kb (DE P-13), between 01 and 13 a similarly regulated but shorter region was identified (DE 01-13). This putative macro RNA is located in the first intron of the protein coding gene DCC (deleted in colorectal carcinoma), a tumor suppressor that is frequently found mutated or downregulated in colorectal and oesophageal cancer. (\*) Wiggle track scale bars indicate y-axis scales of (6,16), (0,10), (-3.5,3.5), and (-4,4) for signal, z-score, differential signal, and conservation, respectively.



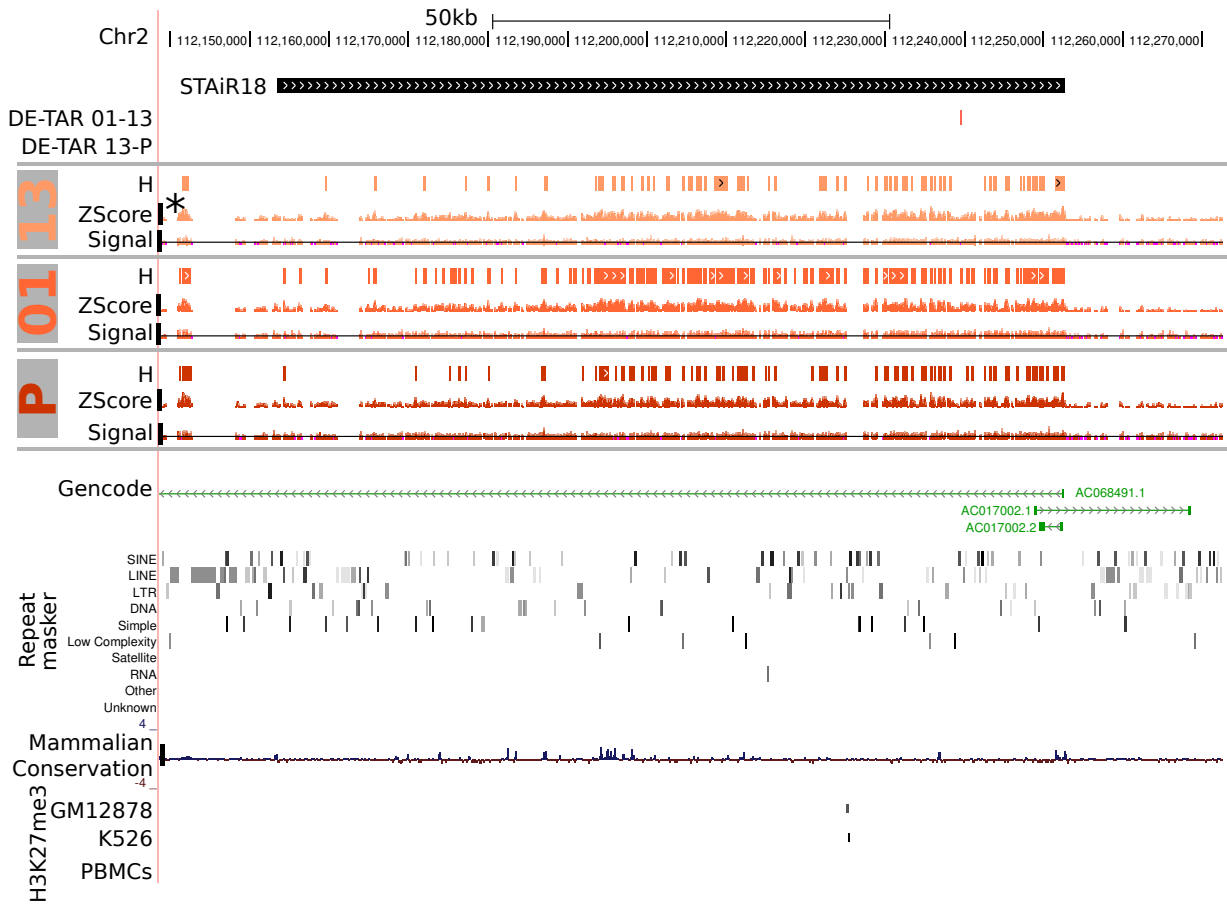

Figure S13: **STAT3-induced RNA 18 (STAiR18)**. INA6 cells were cultured in absence of IL-6 for 13h (13), restimulated for 1h (01), or permanently grown in presence of IL-6 (P) and RNA expression was analyzed using tiling arrays. TileShuffle identified strong expression for all states but no significant differential expression at the stringent cutoff of  $q < 0.005$ . This putative macro RNA is located intergenic and overlaps the complex locus of an annotated non-coding RNA (AC068491.1, Gencode v12) of multiple isoforms. (\*) Wiggle track scale bars indicate y-axis scales of (6,16), (0,10), (-3.5,3.5), and (-4,4) for signal, z-score, differential signal, and conservation, respectively.

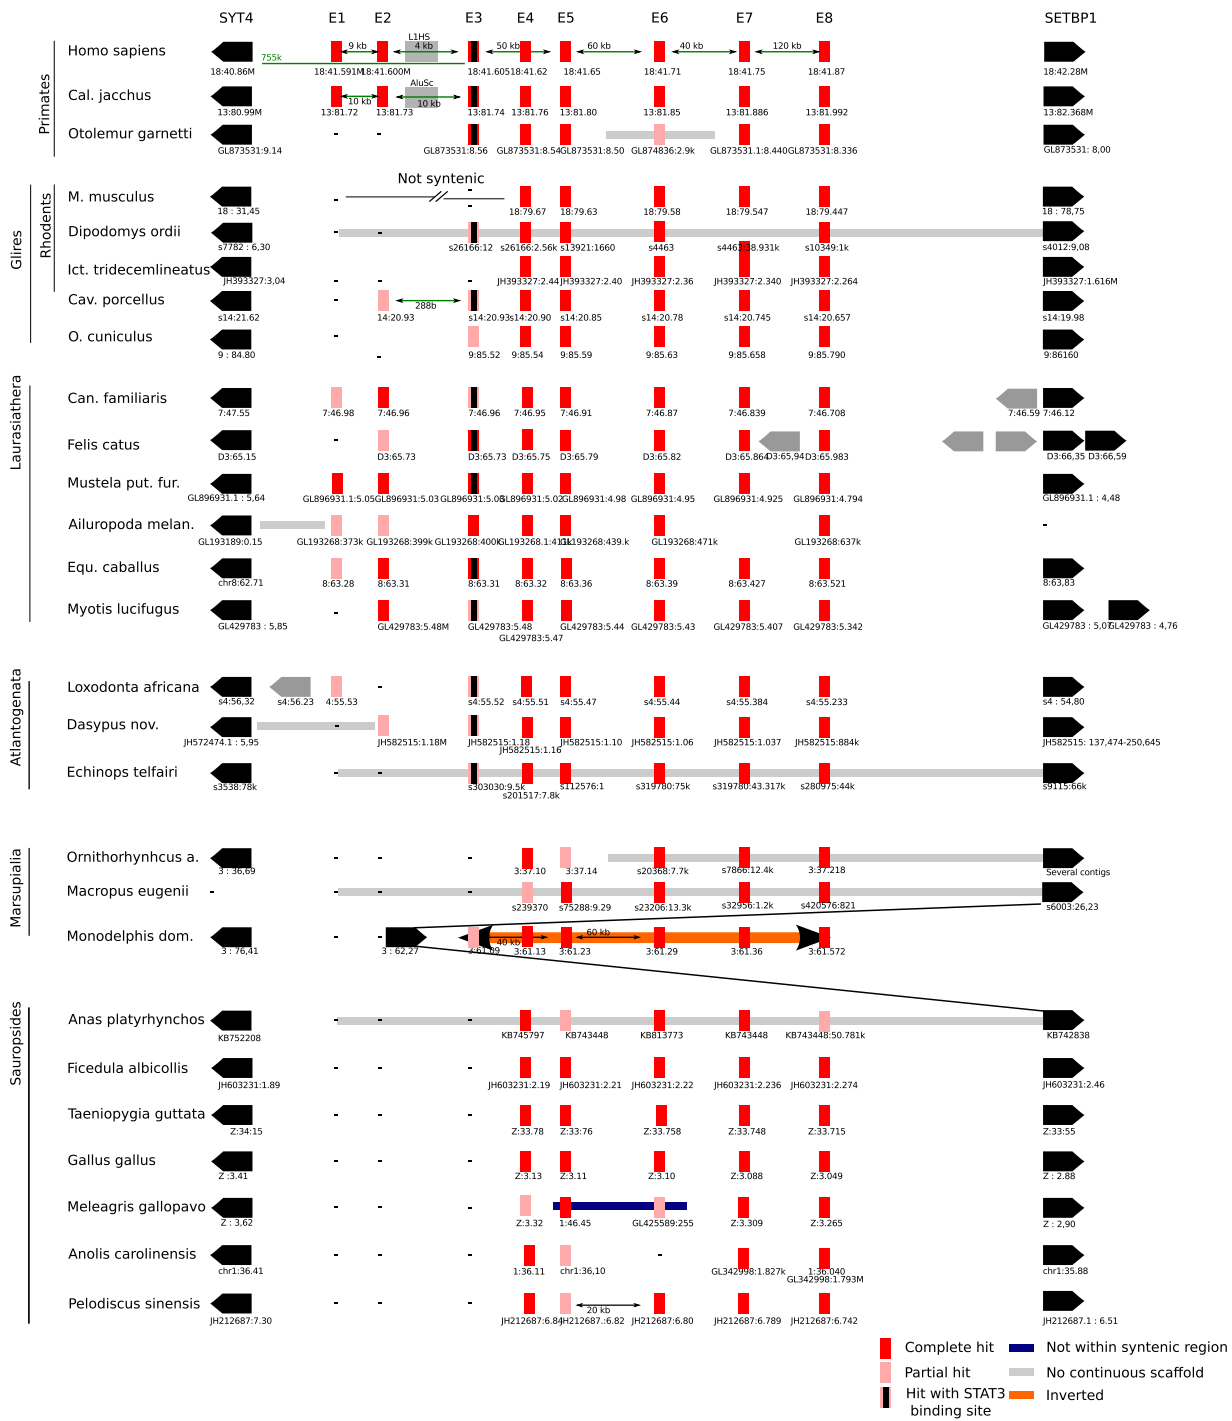

Figure S14: **STAT3-induced RNA 1 (STAiR1) conserved elements.** STAiR1 was aligned to all Ensembl provided vertebrate genomes using BLAST. Several conserved elements throughout STAiR1 that did not overlap annotated repeat elements were selected for further analysis.

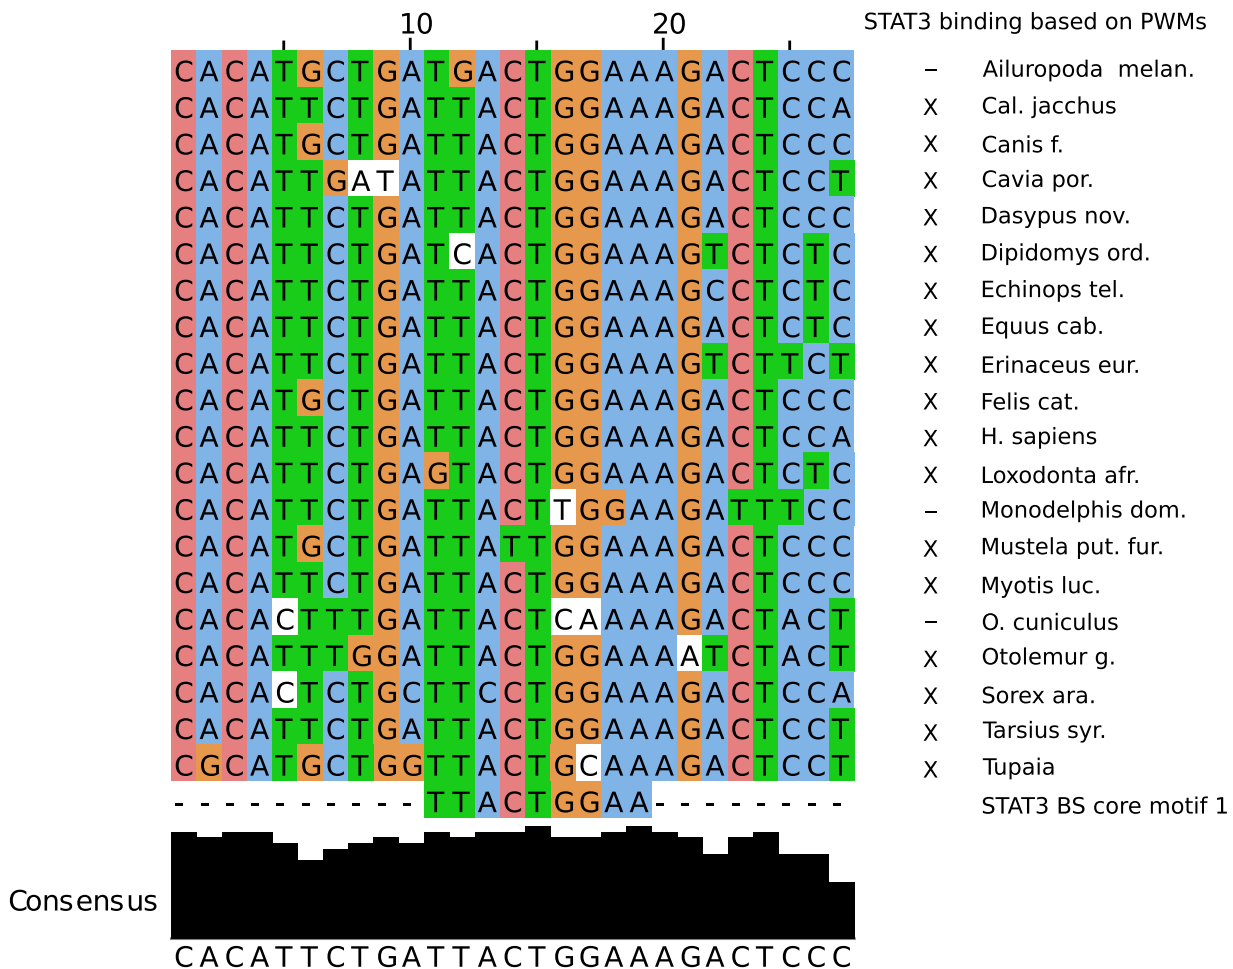

Figure S15: **Conserved STAT3 binding site in STAiR1.** Element E3 sequences were aligned using `clustalw` and trimmed to the occurrence of a STAT3 consensus motif. STAT3 binding was inferred using PWM data from [20, 21]

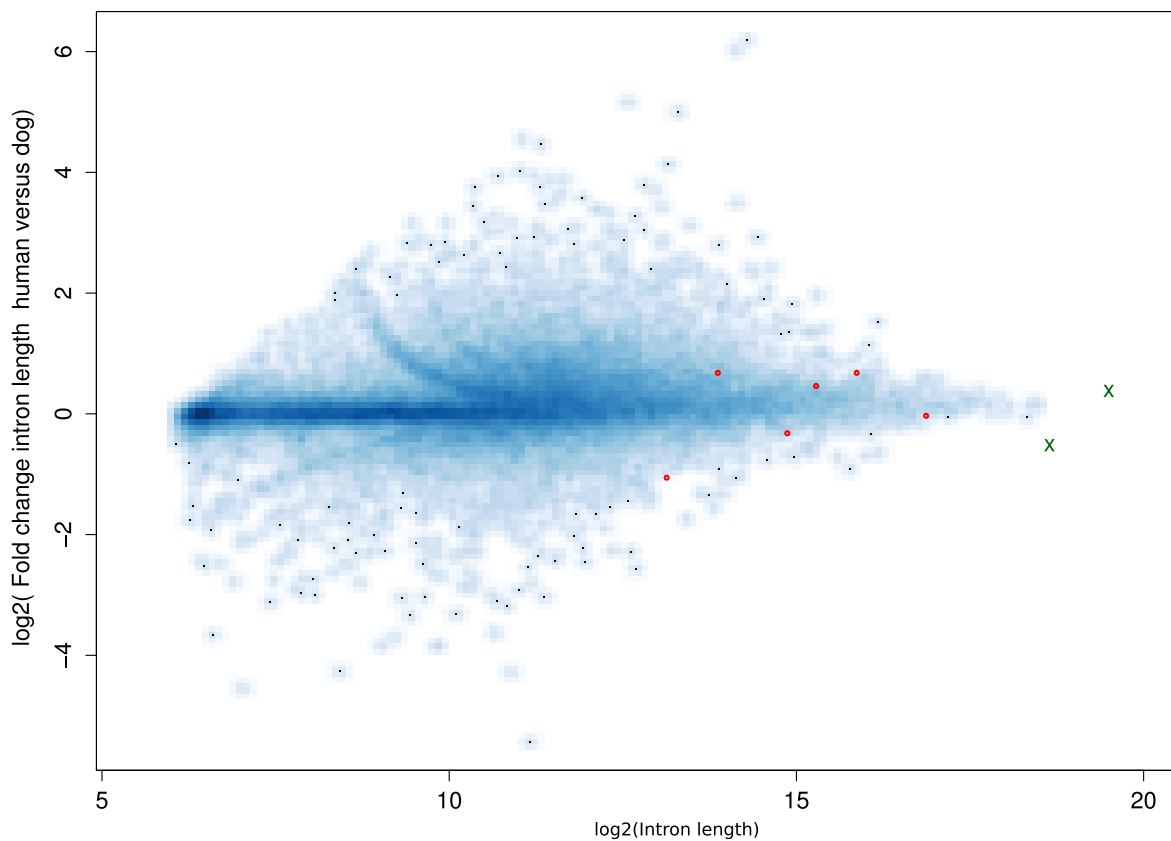

Figure S16: **Variation of intron lengths between man and dog over human intron length.** Lengths of introns conserved fully in man and dog were computed. The log<sub>2</sub> fold changed of human versus canine intron length was plotted on the y, log<sub>2</sub> of human intron length on the x axis. Changes in distances within STAiR1 conserved elements between man and dog, versus human distances were plotted in red circles. Distances of the terminal elements to the adjacent protein coding genes *SYT4* and *SETBP1* were plotted in green x.

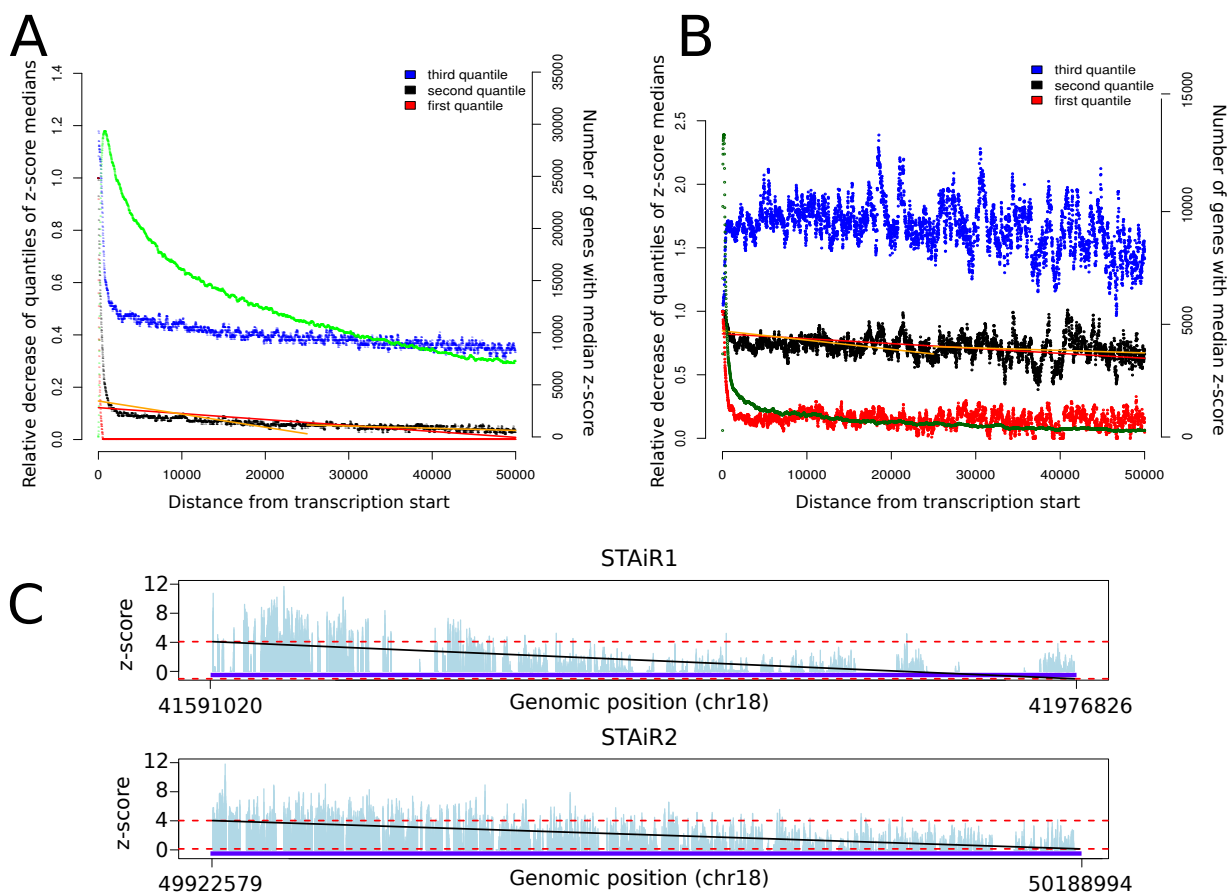

**Figure S17: Continuously transcribed genomic intervals are characterized by a decreasing tiling array expression signal.** (A) Continuous primary transcripts are characterized by a steady signal decay in tiling array data. All human protein coding genes which are expressed in the STAT3 data set after restimulation for 1h have been aligned by their annotated transcription start site (TSS). For each gene, tiling array signal z-scores have been scaled to 1.0 at the TSS. Distribution of z-scores over distance to start site are shown, integrating all genes which are expressed at all in the data set and are intronic at the respective distance to TSS. The green line gives the number of genes which have been included for the respective data point, red, black, and blue lines the first, second, and third quartile of the distribution, respectively. The median is characterized by a steep descent close to the TSS (-5.01 per MB) and a continuous decay of -0.84 per MB over the remaining range of TSS distance. The overall decay over the complete range of distances to TSS is -2.27 per MB (red straight line). A similar, but due to less data more rugged decay is observed for exonic data (B). (C) Identified DE macro ncRNAs show a similar signal descent as observed in A, which hints at a continuous transcription of these intervals. Also, the direction of transcription may be inferred for these macroRNAs in analogy to A.

**Table S12: DE-macroRNAs.** Table summarizing identified DE-macroRNAs. **ID:** identifier of DE-macroRNA; **Name:** internal name of DE-macroRNA (if any assigned); **Cov:** coverage of DE-macroRNA by DE-TAR intervals; **Sil:** denotes the `stairFinder` silhouette score and **Score** the overall `stairFinder` score; **Chr, Start** and **End:** the genomic location of the macroRNA, **Type:** the genomic category the macroRNA falls into (IG - intergenic, E - overlapping exons, EN - overlapping non-coding exons, I - located in introns, ES - joint start but different end as mRNA, P - presumed primary transcript); **Gene:** indicates the protein coding gene which contains or overlaps macroRNA; **Exp\_CC, Exp\_P53, Exp\_STAT3:** tiling array survey the macroRNA was differentially expressed; **Comment:** any comment and information about known ncRNAs overlapping the macroRNA.

| ID     | Name | Cov   | Sil  | Score | Chr   | Start     | End       | Type | Gene      | Ex_CC | Ex_P53 | Ex_STAT3 | Comment                                             |
|--------|------|-------|------|-------|-------|-----------|-----------|------|-----------|-------|--------|----------|-----------------------------------------------------|
| maR-1  |      | 18.5  | 92.5 | 22666 | chr5  | 127419281 | 127544384 | P    | SLC12A2   | 0     | 1      | 0        |                                                     |
| maR-2  |      | 14.5  | 96.5 | 22491 | chr17 | 46626185  | 46724063  | P    | HOXB-AS3  | 0     | 1      | 0        |                                                     |
| maR-3  |      | 10.5  | 94.9 | 20117 | chr2  | 200134573 | 200326143 | P    | SATB2     | 0     | 1      | 0        |                                                     |
| maR-4  |      | 11.4  | 93.7 | 15539 | chr17 | 56429861  | 56494480  | P    | RNF43     | 0     | 1      | 0        |                                                     |
| maR-5  |      | 5.7   | 70.6 | 12421 | chr10 | 114710009 | 114927437 | P    | TCF7L2    | 0     | 1      | 0        |                                                     |
| maR-6  |      | 5.2   | 71.5 | 11847 | chr2  | 87755362  | 87814710  | EN   | LINC00152 | 1     | 1      | 1        | lincRNA, longer in CC and STAT3 but not diff: there |
| maR-7  |      | 42.6  | 94.7 | 11829 | chr15 | 63334884  | 63364088  | P    | TPM1      | 1     | 1      | 0        |                                                     |
| maR-8  |      | 9.8   | 94.4 | 10345 | chr17 | 46626185  | 46724063  | EN   |           | 1     | 1      | 1        | miR hostgene                                        |
| maR-9  |      | 17.1  | 86.5 | 9415  | chr14 | 21677448  | 21737989  | P    | HNRNPC    | 0     | 1      | 1        |                                                     |
| maR-10 |      | 22.6  | 95.1 | 8940  | chr5  | 138610886 | 138654113 | E    | MTR3      | 1     | 1      | 1        |                                                     |
| maR-11 |      | 52.6  | 98.2 | 8537  | chr16 | 9196774   | 9213757   | E    | C16ORF72  | 1     | 1      | 1        |                                                     |
| maR-12 |      | 18.5  | 27.2 | 50276 | chr15 | 82640603  | 83233508  | E    |           | 0     | 1      | 0        |                                                     |
| maR-13 |      | 24.1  | 97.3 | 32673 | chr4  | 144261292 | 144395123 | P    | GABI      | 0     | 1      | 1        |                                                     |
| maR-14 |      | 19.5  | 95.9 | 31041 | chr2  | 96553100  | 96605535  | E    | ANKRD36C  | 1     | 1      | 1        |                                                     |
| maR-15 |      | 35.00 | 96.7 | 29071 | chr2  | 173292604 | 173372186 | P    | ITGA6     | 0     | 1      | 0        |                                                     |
| maR-16 |      | 8.9   | 84.8 | 27752 | chr15 | 99251777  | 99508803  | E    | IGFIR     | 1     | 1      | 0        |                                                     |
| maR-17 |      | 42.5  | 92.4 | 25912 | chr7  | 116165376 | 116202367 | P    | CAV1      | 0     | 1      | 0        |                                                     |
| maR-18 |      | 23.3  | 96.3 | 25335 | chr6  | 54712575  | 54811493  | P    | FAM83B    | 0     | 1      | 0        |                                                     |
| maR-19 |      | 15.3  | 92.9 | 24827 | chr17 | 43582572  | 43663011  | E    |           | 0     | 1      | 0        |                                                     |

| ID     | Name    | Cov   | Sil   | Score | Chr   | Start     | End       | Type | Gene          | Ex_CC | Ex_P53 | Ex_STAT3 | Comment |
|--------|---------|-------|-------|-------|-------|-----------|-----------|------|---------------|-------|--------|----------|---------|
| maR-20 |         | 17.4  | 94.9  | 24646 | chr4  | 87932770  | 88062243  | E    | AFF1          | 0     | 1      | 0        |         |
| maR-21 |         | 33.00 | 90.2  | 24273 | chr4  | 106822308 | 106858303 | E    | NPNT          | 0     | 1      | 0        |         |
| maR-22 |         | 7.3   | 95.4  | 24009 | chr10 | 52076229  | 52395961  | P    | SGMS1         | 0     | 1      | 0        |         |
| maR-23 |         | 6.3   | 93.7  | 23894 | chr17 | 62891406  | 62908341  | E    | LRRRC37A3     | 0     | 1      | 0        |         |
| maR-24 |         | 41.00 | 89.1  | 19725 | chr14 | 60716572  | 60768042  | P    | PPM1A         | 0     | 1      | 0        |         |
| maR-25 |         | 41.1  | 98.00 | 18292 | chr2  | 111881424 | 111925974 | P    | BCL2L11       | 0     | 1      | 1        |         |
| maR-26 |         | 22.5  | 93.1  | 18220 | chr6  | 18389190  | 18469131  | P    | RNF144B       | 0     | 1      | 0        |         |
| maR-27 |         | 19.00 | 98.1  | 15772 | chr7  | 20371792  | 20454781  | P    | ITGB8         | 0     | 1      | 0        |         |
| maR-28 |         | 55.1  | 99.9  | 15745 | chr8  | 74209940  | 74230161  | P    | RDH10         | 0     | 1      | 0        |         |
| maR-29 |         | 17.00 | 87.4  | 13748 | chr1  | 245318243 | 245399217 | ES   | KIF26B        | 0     | 1      | 0        |         |
| maR-30 |         | 9.2   | 94.6  | 13672 | chr3  | 149532698 | 149642694 | P    | RNF13         | 0     | 1      | 0        |         |
| maR-31 |         | 6.4   | 98.8  | 13469 | chr5  | 60629894  | 60841385  | P    | ZSWIM6        | 0     | 1      | 1        |         |
| maR-32 |         | 17.00 | 94.00 | 12827 | chrX  | 88655983  | 88731544  | EN   | RP13-348B13.2 | 0     | 1      | 0        | lincRNA |
| maR-33 |         | 9.8   | 98.4  | 12545 | chrY  | 2879261   | 2976244   | EN   | linc00278     | 0     | 1      | 0        | lincRNA |
| maR-34 |         | 7.7   | 53.00 | 11459 | chr15 | 100174764 | 100212490 | P    | MEF2A         | 0     | 1      | 0        |         |
| maR-35 |         | 7.2   | 80.7  | 11273 | chr15 | 85748543  | 85777210  | E    | RP11-561C5.3  | 0     | 1      | 0        |         |
| maR-36 |         | 5.00  | 96.2  | 10849 | chr12 | 44246475  | 44478028  | E    | TMEM117       | 0     | 1      | 0        |         |
| maR-37 |         | 5.6   | 10.8  | 10560 | chr4  | 99391694  | 99579364  | P    | TSPAN5        | 0     | 1      | 0        |         |
| maR-38 |         | 23.8  | 96.4  | 9554  | chr17 | 45093034  | 45133094  | EN   | RP11-156P1.3  | 1     | 1      | 1        | lincRNA |
| maR-39 |         | 15.9  | 99.1  | 9319  | chr8  | 134249383 | 134308157 | P    | NDRG1         | 0     | 1      | 0        |         |
| maR-40 |         | 27.1  | 93.7  | 9210  | chr2  | 172380452 | 172414397 | P    | CYBRD1        | 0     | 1      | 0        |         |
| maR-41 |         | 21.8  | 99.7  | 8165  | chr4  | 170908379 | 170945902 | P    | MEFAP3L       | 0     | 1      | 0        |         |
| maR-42 |         | 94.7  | 99.2  | 8080  | chr16 | 85437862  | 85446703  | IG   |               | 1     | 1      | 0        |         |
| maR-43 | STAIR1  | 10.1  | 18.7  | 21501 | chr18 | 41591020  | 41976826  | IG   |               | 0     | 0      | 1        |         |
| maR-44 | STAIR12 | 14.9  | 99.3  | 22445 | chr12 | 104851810 | 105004739 | ES   | CHST11        | 0     | 0      | 1        |         |
| maR-45 | STAIR2  | 13.3  | 99.7  | 10944 | chr18 | 49922579  | 50188994  | I    | DCC           | 0     | 0      | 1        |         |
| maR-46 |         | 28.9  | 99.3  | 8145  | chr11 | 111221493 | 111250722 | P    | POU2AF        | 0     | 0      | 1        |         |

| ID     | Name | Cov   | Sil    | Score  | Chr   | Start     | End       | Type | Gene         | Ex_CC | Ex_P53 | Ex_STAT3 | Comment        |
|--------|------|-------|--------|--------|-------|-----------|-----------|------|--------------|-------|--------|----------|----------------|
| maR-47 |      | 11.8  | 98.3   | 22672  | chr2  | 36590795  | 36789955  | P    | CRIMI        | 1     | 0      | 0        |                |
| maR-48 |      | 47.6  | 99.4   | 11386  | chr5  | 98104819  | 98133830  | P    | RGMB         | 1     | 0      | 0        |                |
| maR-49 |      | 11.2  | 95.9   | 13360  | chr15 | 32908000  | 32932636  | P    | ARHGAP11A    | 1     | 0      | 0        |                |
| maR-50 |      | 9.4   | 97.1   | 9266   | chr15 | 30918495  | 30982898  | E    | ARHGAP11B    | 1     | 0      | 0        |                |
| maR-51 |      | 21.3  | 48.1   | 24408  | chr9  | 21442869  | 21559668  | EN   | MIR31HG      | 1     | 0      | 0        | miR hostgene   |
| maR-52 |      | 34.2  | 98.1   | 23545  | chr5  | 95222066  | 95286499  | P    | ELL2         | 1     | 0      | 0        |                |
| maR-53 |      | 12.5  | 87.2   | 14604  | chr4  | 177595309 | 177712068 | P    | VEGFC        | 1     | 0      | 0        |                |
| maR-54 |      | 57.80 | -87.20 | 150765 | chr9  | 20346052  | 20638345  | P    | CELF2        | 0     | 1      | 1        |                |
| maR-55 |      | 31.10 | -97.50 | 93298  | chr15 | 81072954  | 81244747  | P    | KIA1199      | 1     | 1      | 0        |                |
| maR-56 |      | 15.90 | -98.90 | 45247  | chr2  | 153191751 | 153506348 | P    | FMNL2        | 0     | 1      | 0        |                |
| maR-57 |      | 8.80  | -1.20  | 25454  | chr4  | 82564046  | 82950759  | E    | RP11-689K5.3 | 0     | 1      | 0        | snoRNA<br>gene |
| maR-58 |      | 5.00  | -75.70 | 15985  | chr1  | 174133990 | 174509554 | P    | RABGAPIL     | 0     | 1      | 0        |                |
| maR-59 |      | 6.00  | -43.00 | 14111  | chr11 | 19734881  | 20143144  | P    | NAV2         | 1     | 0      | 0        |                |
| maR-60 |      | 11.80 | -69.00 | 28638  | chr6  | 73339569  | 73610550  | ES   | KCNQ5        | 1     | 1      | 1        |                |



**Table S13: DE-macroRNA overlap with known non-coding RNAs.** Overlaps in nucleotides between DE-macroRNAs and known non-coding RNAs. Annotation datasets are described in Supplemental Table S28. Column heading **Survey** indicates if overlap is for cell cycle (CC) or for P53 or STAT3 (IL-6) pathway, **Type** indicates the genomic category the macroRNA falls into (IG - intergenic, E - overlapping exons, EN - overlapping non-coding exons, I - located in introns, ES - joint start but different end as mRNA, P - presumed primary transcript). The length of the genomic region containing the macroRNA is given by **Length**.

| ID     | Survey | Type | short ncRNAs |             |         |          | long ncRNAs |      |            |        | CARs |        |         |        | Secondary Structures |        |  |  |
|--------|--------|------|--------------|-------------|---------|----------|-------------|------|------------|--------|------|--------|---------|--------|----------------------|--------|--|--|
|        |        |      | miRNAs       | sno/scaRNAs | Gencode | lncRNAdb | lincRNAs    | TUCP | intergenic | intron | RNAz | SISSlz | EvoFold | Length |                      |        |  |  |
| maR-6  | P53    | EN   | 0            | 0           | 0       | 0        | 0           | 0    | 0          | 0      | 1115 | 0      | 870     | 1399   | 18                   | 59348  |  |  |
| maR-8  | P53    | EN   | 180          | 0           | 379     | 0        | 1169        | 0    | 0          | 0      | 0    | 0      | 197     | 2640   | 1509                 | 97878  |  |  |
| maR-10 | P53    | E    | 0            | 200         | 0       | 690      | 0           | 0    | 0          | 0      | 0    | 91     | 1474    | 1026   | 175                  | 43227  |  |  |
| maR-11 | P53    | E    | 0            | 0           | 0       | 0        | 0           | 0    | 0          | 0      | 0    | 0      | 0       | 610    | 34                   | 16983  |  |  |
| maR-12 | P53    | E    | 0            | 0           | 0       | 0        | 0           | 0    | 0          | 0      | 0    | 0      | 194     | 1985   | 277                  | 592905 |  |  |
| maR-14 | P53    | E    | 0            | 0           | 0       | 0        | 0           | 0    | 0          | 0      | 0    | 0      | 0       | 490    | 0                    | 52435  |  |  |
| maR-16 | P53    | E    | 0            | 0           | 0       | 0        | 0           | 0    | 0          | 0      | 0    | 76619  | 2098    | 5989   | 121                  | 257026 |  |  |
| maR-19 | P53    | E    | 0            | 0           | 0       | 0        | 0           | 0    | 11         | 0      | 0    | 0      | 0       | 225    | 0                    | 80439  |  |  |
| maR-20 | P53    | E    | 0            | 0           | 0       | 0        | 0           | 0    | 0          | 0      | 0    | 0      | 909     | 2013   | 0                    | 129473 |  |  |
| maR-21 | P53    | E    | 0            | 0           | 0       | 0        | 0           | 0    | 0          | 0      | 0    | 0      | 168     | 308    | 0                    | 35995  |  |  |
| maR-23 | P53    | E    | 0            | 0           | 0       | 0        | 0           | 0    | 0          | 0      | 0    | 0      | 0       | 0      | 0                    | 16935  |  |  |
| maR-29 | P53    | ES   | 0            | 0           | 0       | 0        | 0           | 0    | 0          | 0      | 0    | 708    | 2119    | 2153   | 0                    | 80974  |  |  |
| maR-32 | P53    | EN   | 0            | 0           | 469     | 0        | 469         | 0    | 0          | 0      | 0    | 0      | 2358    | 570    | 0                    | 75561  |  |  |
| maR-33 | P53    | EN   | 0            | 0           | 469     | 0        | 469         | 0    | 0          | 0      | 0    | 0      | 0       | 329    | 0                    | 96983  |  |  |
| maR-35 | P53    | E    | 0            | 0           | 0       | 0        | 0           | 0    | 1261       | 0      | 0    | 0      | 0       | 102    | 0                    | 28667  |  |  |
| maR-36 | P53    | E    | 0            | 0           | 0       | 0        | 0           | 0    | 0          | 0      | 0    | 0      | 4330    | 2542   | 22                   | 231553 |  |  |
| maR-38 | P53    | EN   | 0            | 0           | 0       | 0        | 0           | 0    | 0          | 0      | 0    | 0      | 0       | 443    | 0                    | 40060  |  |  |
| maR-42 | P53    | IG   | 0            | 0           | 0       | 0        | 0           | 0    | 0          | 0      | 0    | 0      | 0       | 0      | 0                    | 8841   |  |  |
| maR-43 | IL6    | IG   | 0            | 0           | 0       | 0        | 2205        | 0    | 0          | 0      | 0    | 0      | 5699    | 3227   | 132                  | 385806 |  |  |
| maR-44 | IL6    | ES   | 0            | 0           | 0       | 0        | 0           | 0    | 0          | 0      | 0    | 0      | 2011    | 4817   | 0                    | 152929 |  |  |

| macroRNA |        | short ncRNAs |        |             |         | long ncRNAs |          |      |            | CARs   |      |        |         | Secondary Structures |  |  |  |
|----------|--------|--------------|--------|-------------|---------|-------------|----------|------|------------|--------|------|--------|---------|----------------------|--|--|--|
| ID       | Survey | Type         | miRNAs | sno/scaRNAs | Gencode | lncRNAdb    | lincRNAs | TUCP | intergenic | intron | RNAz | SISSlz | Evofold | Length               |  |  |  |
| maR-45   | IL6    | I            | 0      | 0           | 0       | 0           | 0        | 0    | 0          | 0      | 1742 | 3133   | 29      | 266415               |  |  |  |
| maR-50   | CC     | E            | 0      | 0           | 0       | 0           | 0        | 0    | 0          | 0      | 0    | 355    | 0       | 64403                |  |  |  |
| maR-51   | CC     | EN           | 0      | 0           | 0       | 0           | 0        | 0    | 0          | 59140  | 690  | 774    | 179     | 64433                |  |  |  |
| maR-57   | P53    | E            | 0      | 0           | 0       | 0           | 0        | 416  | 0          | 0      | 4090 | 5849   | 18      | 386713               |  |  |  |
| maR-60   | CC     | ES           | 0      | 0           | 0       | 0           | 0        | 0    | 0          | 0      | 4042 | 4259   | 21      | 270981               |  |  |  |

**Table S14: DE-macroRNA overlap with regulatory sites and epigenetically modified regions.** Overlaps in nucleotides between DE-macroRNAs and putative promoter regions, transcription factor bindings sites and epigenetically modified regions. Annotation datasets are described in Supplemental Table S28. Column heading **Survey** indicates if overlap is for cell cycle (CC) or for P53 or STAT3 (IL-6) pathway, **Type** indicates the genomic category the macroRNA falls into (IG - intergenic, E - overlapping exons, EN - overlapping non-coding exons, I - located in introns, ES - joint start but different end as mRNA, P - presumed primary transcript). The length of the genomic region containing the macroRNA is given by **Length**.

| macroRNA |        | TFBs |         |          |         |         |          |        |        |        |          |       | CpG         |        |
|----------|--------|------|---------|----------|---------|---------|----------|--------|--------|--------|----------|-------|-------------|--------|
| ID       | Survey | Type | H3K27ac | H3K36me3 | H3K4me1 | H3K4me3 | H3k27me3 | POL-II | DNaseI | Encode | Transfac | CpG   | and H3K4me3 | Length |
| maR-6    | P53    | EN   | 58448   | 59348    | 59348   | 39098   | 59348    | 58923  | 7028   | 7669   | 1655     | 0     | 0           | 59348  |
| maR-8    | P53    | EN   | 85678   | 97878    | 95678   | 91953   | 97878    | 53178  | 45858  | 43684  | 14904    | 13821 | 13325       | 97878  |
| maR-10   | P53    | E    | 29390   | 43227    | 35065   | 26140   | 1615     | 35215  | 10630  | 10231  | 1567     | 1146  | 1146        | 43227  |
| maR-11   | P53    | E    | 16983   | 16983    | 16983   | 12050   | 0        | 16983  | 4487   | 1696   | 935      | 0     | 0           | 16983  |
| maR-12   | P53    | E    | 131200  | 401563   | 304042  | 91350   | 423880   | 100925 | 3980   | 3382   | 4139     | 10915 | 10049       | 592905 |
| maR-14   | P53    | E    | 34500   | 52435    | 43223   | 4300    | 8962     | 2000   | 2000   | 1878   | 0        | 0     | 0           | 52435  |
| maR-16   | P53    | E    | 129750  | 257026   | 220276  | 78775   | 257026   | 49525  | 59220  | 53708  | 9902     | 1139  | 890         | 257026 |
| maR-19   | P53    | E    | 13319   | 80439    | 26919   | 14469   | 80439    | 21244  | 4670   | 4761   | 912      | 870   | 870         | 80439  |
| maR-20   | P53    | E    | 92181   | 129473   | 112023  | 58081   | 22875    | 42206  | 34070  | 23605  | 2633     | 0     | 0           | 129473 |
| maR-21   | P53    | E    | 3650    | 35995    | 10577   | 0       | 35995    | 575    | 2853   | 2486   | 552      | 0     | 0           | 35995  |
| maR-23   | P53    | E    | 607     | 16935    | 6032    | 0       | 16935    | 325    | 210    | 0      | 171      | 0     | 0           | 16935  |
| maR-29   | P53    | ES   | 675     | 11050    | 31274   | 7284    | 80974    | 2175   | 11787  | 9288   | 2260     | 2004  | 2004        | 80974  |
| maR-32   | P53    | EN   | 0       | 40386    | 14475   | 0       | 75561    | 0      | 590    | 510    | 315      | 0     | 0           | 75561  |
| maR-33   | P53    | EN   | 0       | 0        | 0       | 0       | 0        | 0      | 630    | 1027   | 0        | 0     | 0           | 96983  |
| maR-35   | P53    | E    | 5989    | 27553    | 14014   | 4989    | 28667    | 8117   | 0      | 0      | 0        | 86    | 86          | 28667  |
| maR-36   | P53    | E    | 11383   | 131808   | 60083   | 5850    | 88508    | 725    | 13700  | 11549  | 2499     | 0     | 0           | 231553 |
| maR-38   | P53    | EN   | 1625    | 40060    | 6250    | 725     | 21975    | 5925   | 0      | 0      | 674      | 0     | 0           | 40060  |
| maR-42   | P53    | IG   | 287     | 8841     | 0       | 0       | 279      | 0      | 0      | 0      | 0        | 0     | 0           | 8841   |
| maR-43   | IL6    | IG   | 15625   | 16925    | 64850   | 6600    | 347156   | 2350   | 18080  | 13247  | 4910     | 0     | 0           | 385806 |
| maR-44   | IL6    | ES   | 94360   | 152929   | 140454  | 76110   | 15910    | 26360  | 39959  | 31987  | 2763     | 585   | 585         | 152929 |

| macroRNA |        | TFBs |         |          |         |         |          |        |        |        |          | CpG |             |        |
|----------|--------|------|---------|----------|---------|---------|----------|--------|--------|--------|----------|-----|-------------|--------|
| ID       | Survey | Type | H3K27ac | H3K36me3 | H3K4me1 | H3K4me3 | H3k27me3 | POL-II | DNaseI | Encode | Transfac | CpG | and H3K4me3 | Length |
| maR-45   | IL6    | I    | 273     | 1775     | 11048   | 275     | 181390   | 0      | 13480  | 7098   | 7881     | 0   | 0           | 266415 |
| maR-50   | CC     | E    | 15863   | 64403    | 22663   | 8738    | 8828     | 20163  | 3170   | 1699   | 26       | 70  | 70          | 64403  |
| maR-51   | CC     | EN   | 49680   | 64433    | 60283   | 26505   | 0        | 60103  | 13190  | 10991  | 2684     | 0   | 0           | 64433  |
| maR-57   | P53    | E    | 14125   | 83850    | 107150  | 18025   | 386713   | 7500   | 20940  | 18115  | 6054     | 0   | 0           | 386713 |
| maR-60   | CC     | ES   | 62260   | 270981   | 143110  | 26435   | 236806   | 5875   | 30380  | 16900  | 5422     | 0   | 0           | 270981 |

Table S15: **DE-macroRNA overlap with repeat regions.** Overlaps are calculated by using the Bioconductor `genomeIntervals` package [6]. The significance of the observed overlap is assessed by sampling 100 genomic loci for each macroRNA preserving macroRNA length. Odds ratios of observed versus expected relative overlaps are calculated and tested by Fisher’s exact test for significant enrichment or depletion (see Materials and Methods). Column heading **Repeat class** indicates type of repeat as indicated in the UCSC `RepeatMasker` track (December 2013). Remaining columns indicate the results (**log2(Odds ratio)**, **P-value**, and 95% confidence interval) and the data (**DE-macroRNAs**: number of overlapping or non-overlapping nucleotides of DE-macroRNAs with repeats; **BG**: average number of overlapping or non-overlapping nucleotides of random intervals with repeats) of Fisher’s exact test. Only significantly enriched or depleted overlaps of at least two fold are reported, i.e.  $P\text{-value} < 0.01$  and  $|\log_2(\text{Odds ratio})| > 1$ .

|        | Repeat class | Fisher’s exact test |           |               | overlap      |       | no overlap   |        |
|--------|--------------|---------------------|-----------|---------------|--------------|-------|--------------|--------|
|        |              | log2(Odds ratio)    | P-value   | 95% CI        | DE-macroRNAs | BG    | DE-macroRNAs | BG     |
| maR-10 | Alu          | 1.90                | 0.00e+00  | [1.80, 1.95]  | 11511        | 1959  | 31716        | 19760  |
|        | DNA          | -1.70               | 2.36e-100 | [-1.82,-1.51] | 557          | 863   | 42670        | 20856  |
|        | LINE         | -2.40               | 0.00e+00  | [-2.47,-2.32] | 2260         | 4888  | 40967        | 16831  |
|        | RNAs         | 1.70                | 5.62e-07  | [0.94, 2.52]  | 109          | 17    | 43118        | 21702  |
|        | Simple       | -2.90               | 6.38e-42  | [-3.36,-2.38] | 47           | 170   | 43180        | 21549  |
|        | SINE         | 1.60                | 0.00e+00  | [1.52, 1.65]  | 12417        | 2576  | 30810        | 19142  |
| maR-11 | LINE         | -2.70               | 0.00e+00  | [-2.81,-2.54] | 633          | 1740  | 16350        | 7045   |
|        | Simple       | -1.60               | 2.64e-08  | [-2.19,-1.00] | 42           | 65    | 16941        | 8721   |
| maR-12 | LINE         | -1.30               | 0.00e+00  | [-1.32,-1.28] | 53612        | 56857 | 539293       | 232226 |
| maR-14 | Alu          | -4.40               | 0.00e+00  | [-4.58,-4.23] | 306          | 2821  | 52129        | 22703  |
|        | LINE         | -2.70               | 0.00e+00  | [-2.73,-2.57] | 2080         | 5262  | 50355        | 20263  |
|        | Low_compl    | -2.60               | 1.08e-36  | [-3.12,-2.18] | 53           | 160   | 52382        | 25364  |
|        | Simple       | -2.00               | 5.41e-27  | [-2.36,-1.59] | 89           | 169   | 52346        | 25356  |
|        | SINE         | -4.80               | 0.00e+00  | [-4.93,-4.58] | 306          | 3486  | 52129        | 22038  |
| maR-16 | LINE         | -1.90               | 0.00e+00  | [-1.92,-1.86] | 16837        | 22263 | 240189       | 85692  |
|        | LTR          | -1.80               | 0.00e+00  | [-1.88,-1.79] | 6827         | 9580  | 250199       | 98375  |
|        | RNAs         | 2.00                | 3.14e-28  | [1.58, 2.46]  | 467          | 49    | 256559       | 107906 |
|        | Simple       | -1.30               | 9.61e-92  | [-1.39,-1.15] | 1106         | 1112  | 255920       | 106843 |
| maR-19 | Alu          | 1.40                | 0.00e+00  | [1.39, 1.50]  | 18178        | 4022  | 62261        | 37426  |
|        | LTR          | -3.00               | 0.00e+00  | [-3.11,-2.90] | 944          | 3599  | 79495        | 37849  |
|        | RNAs         | 2.20                | 2.50e-27  | [1.71, 2.71]  | 344          | 39    | 80095        | 41410  |
|        | SINE         | 1.30                | 0.00e+00  | [1.24, 1.33]  | 20656        | 5150  | 59783        | 36298  |
| maR-20 | LINE         | -1.90               | 0.00e+00  | [-1.90,-1.82] | 8583         | 14909 | 120890       | 57934  |
|        | LTR          | -2.60               | 0.00e+00  | [-2.72,-2.56] | 1904         | 6201  | 127569       | 66641  |
| maR-21 | DNA          | -1.40               | 5.93e-47  | [-1.55,-1.17] | 433          | 530   | 35562        | 16932  |
|        | LINE         | -1.00               | 9.07e-192 | [-1.12,-0.98] | 4347         | 3864  | 31648        | 13598  |
|        | LTR          | -4.20               | 0.00e+00  | [-4.37,-3.94] | 205          | 1617  | 35790        | 15845  |
| maR-23 | Alu          | 1.40                | 2.23e-172 | [1.33, 1.55]  | 4637         | 993   | 12298        | 7129   |
|        | LINE         | -2.70               | 0.00e+00  | [-2.86,-2.58] | 629          | 1646  | 16306        | 6476   |
|        | Low_compl    | -1.80               | 1.43e-08  | [-2.45,-1.13] | 33           | 54    | 16902        | 8067   |

|         | Repeat class | log2(Odds ratio) | P-value   | 95% CI        | overlap      |       | no overlap   |        |
|---------|--------------|------------------|-----------|---------------|--------------|-------|--------------|--------|
|         |              |                  |           |               | DE-macroRNAs | BG    | DE-macroRNAs | BG     |
|         | SINE         | 1.20             | 1.48e-138 | [1.12, 1.33]  | 4872         | 1196  | 12063        | 6926   |
| maR-29  | LTR          | -2.50            | 0.00e+00  | [-2.64,-2.44] | 1191         | 3001  | 79783        | 34562  |
| maR-32  | LINE         | 1.60             | 0.00e+00  | [1.55, 1.63]  | 32922        | 8528  | 42639        | 33324  |
|         | Simple       | 1.60             | 1.59e-84  | [1.38, 1.73]  | 1659         | 318   | 73902        | 41534  |
|         | SINE         | -1.30            | 0.00e+00  | [-1.37,-1.24] | 3611         | 4608  | 71950        | 37243  |
| maR-33  | LINE         | 1.70             | 0.00e+00  | [1.66, 1.74]  | 43780        | 9012  | 53203        | 35569  |
| maR-35  | LINE         | -1.10            | 1.12e-142 | [-1.17,-1.00] | 2640         | 2699  | 26027        | 12522  |
|         | LTR          | 2.70             | 0.00e+00  | [2.64, 2.85]  | 9069         | 983   | 19598        | 14238  |
|         | RNAs         | 3.30             | 1.57e-24  | [2.40, 4.30]  | 199          | 11    | 28468        | 15210  |
| maR-38  | LTR          | -4.60            | 0.00e+00  | [-4.84,-4.33] | 144          | 1611  | 39916        | 18690  |
|         | RNAs         | 2.70             | 2.91e-30  | [2.13, 3.42]  | 302          | 23    | 39758        | 20278  |
| maR-42  | LTR          | -2.40            | 1.27e-76  | [-2.73,-2.17] | 159          | 371   | 8682         | 3708   |
| maR-43  | Alu          | -1.10            | 0.00e+00  | [-1.13,-1.07] | 16638        | 17423 | 369168       | 180722 |
| STAiR1  | LINE         | 1.30             | 0.00e+00  | [1.31, 1.35]  | 149121       | 39750 | 236685       | 158395 |
|         | RNAs         | 1.20             | 4.60e-19  | [0.94, 1.55]  | 515          | 112   | 385291       | 198034 |
| maR-44  | LINE         | -1.20            | 0.00e+00  | [-1.26,-1.19] | 14611        | 16557 | 138318       | 66840  |
| STAiR12 |              |                  |           |               |              |       |              |        |
| maR-45  | Alu          | -1.10            | 0.00e+00  | [-1.11,-1.04] | 12213        | 12361 | 254202       | 122063 |
| STAiR2  | LTR          | -1.30            | 0.00e+00  | [-1.31,-1.23] | 11216        | 12886 | 255199       | 121538 |
| maR-50  | LTR          | -1.30            | 1.40e-171 | [-1.41,-1.23] | 1981         | 2046  | 62422        | 25809  |
|         | RNAs         | 1.80             | 9.13e-11  | [1.19, 2.54]  | 181          | 22    | 64222        | 27833  |
| maR-51  | LINE         | -1.60            | 0.00e+00  | [-1.66,-1.54] | 5016         | 6388  | 59417        | 25005  |
| maR-57  | Alu          | -1.00            | 0.00e+00  | [-1.05,-0.99] | 20942        | 19023 | 365771       | 163523 |
| maR-60  | LTR          | -1.20            | 0.00e+00  | [-1.27,-1.19] | 11067        | 11732 | 259914       | 117152 |
|         | RNAs         | 3.00             | 3.98e-133 | [2.65, 3.32]  | 1337         | 81    | 269644       | 128804 |
| maR-6   | DNA          | -1.00            | 1.20e-58  | [-1.13,-0.88] | 1154         | 1107  | 58194        | 27781  |
|         | LINE         | -2.30            | 0.00e+00  | [-2.41,-2.27] | 2711         | 5623  | 56637        | 23264  |
|         | LTR          | -1.10            | 2.25e-158 | [-1.19,-1.03] | 2665         | 2661  | 56683        | 26227  |
| maR-8   | Alu          | -3.60            | 0.00e+00  | [-3.74,-3.52] | 858          | 5090  | 97020        | 46471  |
|         | DNA          | -4.40            | 0.00e+00  | [-4.61,-4.12] | 150          | 1574  | 97728        | 49986  |
|         | LINE         | -7.30            | 0.00e+00  | [-7.55,-7.07] | 154          | 10244 | 97724        | 41316  |
|         | Low_compl    | 1.30             | 7.54e-51  | [1.13, 1.51]  | 1299         | 277   | 96579        | 51283  |
|         | SINE         | -3.30            | 0.00e+00  | [-3.35,-3.18] | 1494         | 6679  | 96384        | 44881  |

## 5.1 Evolutionary selection acting on STAiR1 compared to its neighbor protein-coding genes

STAiR1 is located in intergenic space of the protein-coding genes of SETBP1 (SET binding protein 1) and SYT4 (Synaptotagmin IV). The gene *SETBP1* encodes a protein that binds to the protein product of *SET* (SET nuclear oncogene). High expression of both SETBP1 or SET is associated with myeloid malignancies [22, 23]. We found STAiR1 to be differentially expressed in a human myeloma cell line (INA-6) depending on STAT3 expression, and asked ourselves if STAiR1 expression may interfere with *SETBP1* expression in *cis*. If STAiR1 would function in *cis*, it should evolve closely with its protein-coding target gene *SETBP1*, i.e. substitution rates should not differ largely. Wong and Nielsen, *Genetics* 2004 [24], introduced a phylogenetic model to detect faster evolution in non-coding regions when compared to a protein-coding "reference" gene. Selection on protein-coding genes is usually assessed by the  $d_N/d_S$  ratio of non-synonymous substitution rates ( $d_N$ ) and synonymous substitution rates ( $d_S$ ). Accordingly, Wong and Nielsen define  $\zeta = d_{NC}/d_S$ , with  $d_{NC}$  denoting the nucleotide substitution rate in the non-coding region under the HKY85 model [25] for neutral evolution. On the basis of a phylogenetic tree (which is assumed to be the same for the coding and non-coding sequences) they propose to compare the likelihoods of this tree under different ranges of  $\zeta$  and to conduct likelihood ratio tests to detect which model is more likely. They propose three models, a model for neutral evolution (constraints:  $0 < \zeta_0 < 1$  and  $\zeta_1 = 1$ ), and two different models for faster evolution (two-category model:  $0 < \zeta_0 < 1$  and  $\zeta_1 \geq 1$ , three-category model  $0 < \zeta_0 < 1$ ,  $\zeta_1 = 1$ , and  $\zeta_2 > 1$ ).

We constructed a phylogenetic tree from orthologous sequences (*Homo sapiens* - hg19, *Callithrix jacchus* - calJac3.2.1, *Cavia porcellus* - cavPor3, *Canis familiaris* - canFam3.1, *Felis catus* - felCat6.2, *Equus caballus* - equCab2, *Gallus gallus* - galGal4, *Anolis carolinensis* - anoCar2.0) of the conserved element 2 of STAiR1 and the `MultiZ` alignment of a conserved region of the first exon in *SETBP1*. We ensured that the open reading frame for all orthologous sequences of the protein-coding was in line with the known ORF of the human *SETBP1* by visual inspection in the UCSC genome browser.

The likelihood of the phylogenetic tree for the three different models were calculated using `EvOnc` [24]. The estimated parameters for  $\zeta$  and according likelihood ratio tests did not favor the two-, or the three-category model over the neutral model (Supplemental Table S16). Hence, no evidence is provided that STAiR1 evolves faster than *SETBP1*, thus the possibility of a *cis* regulatory function of STAiR1 cannot be excluded. The same analysis was conducted with an alignment containing STAiR1 and a conserved region of the second exon of *SYT4*, again *cis* regulation of STAiR1 cannot be excluded.

| Model          | Log likelihood   |        | Selection on neighbor gene |           |           | Selection on STAiR1 |           |        | LR-Test       |  |
|----------------|------------------|--------|----------------------------|-----------|-----------|---------------------|-----------|--------|---------------|--|
|                | of combined tree |        | $\kappa$                   | $d_N/d_S$ | $\zeta_0$ | $\zeta_1$           | $\zeta_2$ | LR     | P-value       |  |
| <i>SETBP1</i>  |                  |        |                            |           |           |                     |           |        |               |  |
| Neutral        | -3303.759        | 4.1035 | 0.0145                     | 0.001     | [0.37]    | 1.000               | [0.62]    |        |               |  |
| Two-category   | -3302.404        | 3.9299 | 0.0201                     | 0.001     | [0.37]    | 1.382               | [0.62]    | 0.257  | 0.099         |  |
| Three-category | -3301.316        | 4.2299 | 0.0144                     | 0.001     | [0.37]    | 1.000               | [0.61]    | 11.061 | [0.01] 0.086  |  |
| <i>SYT4</i>    |                  |        |                            |           |           |                     |           |        |               |  |
| Neutral        | -2951.751        | 5.1380 | 0.0269                     | 0.001     | [0.38]    | 1.000               | [0.61]    |        |               |  |
| Two-category   | -2951.752        | 5.1370 | 0.0269                     | 0.001     | [0.38]    | 1.001               | [0.61]    | 1.001  | 1.000         |  |
| Three-category | -2950.092        | 5.2851 | 0.0266                     | 0.001     | [0.38]    | 1.000               | [0.61]    | 15.856 | [0.006] 0.190 |  |

Table S16: **Evolutionary selection acting on STAiR1 compared to its neighbor protein-coding genes SETBP1 and SYT4.** Log-likelihoods of phylogenetic trees under three different models as computed by EVONC [24]. In detail, the parameters for a model reflecting neutral evolution (constraints:  $0 < \zeta_0 < 1$  and  $\zeta_1 = 1$ ), and two models reflecting faster evolution of STAiR1 compared to the according protein-coding gene (two-category model:  $0 < \zeta_0 < 1$  and  $\zeta_1 \geq 1$ ; three-category model  $0 < \zeta_0 < 1$ ,  $\zeta_1 = 1$ , and  $\zeta_2 > 1$ ) were calculated. Phylogenetic trees were derived from combined multiple alignments containing the conserved element 2 of STAiR1 (731bp) and either the Mu11iz alignment of a conserved region (192bp) of the first exon in *SETBP1* or a conserved region (180bp) of the second exon of *SYT4*. Numbers in brackets denote the probability to observe a particular value of  $\zeta_0$ ,  $\zeta_1$ , or  $\zeta_2$ . Likelihood ratio tests (**LR-Test**) have been computed for the neutral model compared to the two-category model with one degree of freedom ( $df = 1$ ) and for the neutral model compared to the three-category model with two degrees of freedom ( $df = 2$ ). **P-value** denotes the probability to receive a likelihood ratio (**LR**) at least as extreme as the observed one under the null hypothesis of neutral evolution. P-values were approximated by  $-2 \log \text{LR} \sim \chi_{df}^2$ .



## 6 Disease associated ncRNAs

### 6.1 Clinical data of astrocytoma tumor subtypes

| ID    | Pathology | Age | Sex | Tumor location        | OS (months)     | Ki67   |
|-------|-----------|-----|-----|-----------------------|-----------------|--------|
| I-1   | AI        | 9   | F   | cerebellar hemisphere | Alive after 104 | 5%     |
| I-2   | AI        | 10  | M   | parietal              | Alive after 93  | 10%    |
| I-3   | AI        | 14  | F   | cerebellar hemisphere | Alive after 73  | 5%     |
| I-4   | AI        | 10  | M   | cerebellar hemisphere | Alive after 45  | 1%     |
| III-1 | AIII      | 32  | F   | temporal              | 107             | 5-10%  |
| III-2 | AIII      | 22  | M   | frontal               | 51              | 25%    |
| III-3 | AIII      | 45  | M   | frontal               | Alive after 71  | 5-10%  |
| III-4 | AIII      | 23  | M   | parietal              | Alive after 63  | 5%     |
| IV-1  | GBM       | 62  | M   | parietal              | 18              | 50%    |
| IV-2  | GBM       | 62  | M   | frontal               | 3               | 25%    |
| IV-3  | GBM       | 42  | M   | frontal               | 11              | 40%    |
| IV-4  | GBM       | 69  | M   | parietal              | 11              | 30-40% |

Table S17: Clinical, pathological, and immunohistochemical data of presented tumors. For the proliferative marker Ki67, percentage values were attributed to each case evaluating ten fields (x400 magnification).

## 6.2 Content of the custom microarray - nONCOchip

| Annotation                             | Number of probes | Fraction of probes |
|----------------------------------------|------------------|--------------------|
| CDS (sense)                            | 12254            | 0.062              |
| CDS (antisense)                        | 6034             | 0.030              |
| 5'UTRs (sense)                         | 1553             | 0.007              |
| 5'UTRs (antisense)                     | 1278             | 0.006              |
| 3'UTRs (sense)                         | 23639            | 0.120              |
| 3'UTRs (antisense)                     | 11183            | 0.057              |
| Introns (sense)                        | 39405            | 0.200              |
| Introns (antisense)                    | 40862            | 0.208              |
| Pseudogenes                            | 2761             | 0.014              |
| Intergenic                             | 59050            | 0.301              |
| Evofold                                | 16057            | 0.081              |
| RNAz                                   | 1197             | 0.006              |
| SISSIz                                 | 5338             | 0.027              |
| CARs (intergenic)                      | 319              | 0.001              |
| CARs (intronic)                        | 2004             | 0.010              |
| lncRNAs (Gencode)                      | 772              | 0.003              |
| lncRNAdb                               | 439              | 0.002              |
| lincRNAs                               | 1347             | 0.006              |
| TUCP                                   | 723              | 0.003              |
| TINs                                   | 2251             | 0.011              |
| PINs                                   | 1595             | 0.008              |
| miRNAs                                 | 248              | 0.001              |
| snoRNAs/scaRNAs                        | 354              | 0.001              |
| DE-TARs ( <i>bona fide</i> non-coding) |                  |                    |
| CC (intergenic)                        | 445              | 0.002              |
| CC (intron)                            | 2504             | 0.012              |
| P53 (intergenic)                       | 641              | 0.003              |
| P53 (intron)                           | 6598             | 0.033              |
| STAT3 (intergenic)                     | 266              | 0.001              |
| STAT3 (intron)                         | 405              | 0.002              |

Table S18: **nONCOchip custom microarray**. Absolute and relative number of probes on the nONCOchip overlapping with different annotation categories. Each probe overlapping to at least 95% (i.e. 57 nucleotides) with an annotation is counted. Detailed description of annotation categories is provided in Supplemental Table S28.

### 6.3 Differential expression of astrocytoma of grade I versus aggressive states (grade III or IV)

|                                    | Grade I < Aggressive |                   |         |       | Grade I > Aggressive |                   |        |       |
|------------------------------------|----------------------|-------------------|---------|-------|----------------------|-------------------|--------|-------|
|                                    | Probes               | Gencode v12 genes |         | Novel | Probes               | Gencode v12 genes |        | Novel |
|                                    |                      | Probes            | Genes   |       |                      | Probes            | Genes  |       |
| All probes                         | 7727                 | 1764              | 1532    | 1747  | 5581                 | 4132              | 2572   | 132   |
| <i>Bona fide</i> non-coding probes | 4860                 | 105               | 93 (29) | 1635  | 690                  | 71                | 33 (6) | 90    |
| Protein-coding probes              | 1365                 | 1365              | 1151    | -     | 3881                 | 3881              | 2382   | -     |

Table S19: **Differential expression between astrocytoma of grade I versus aggressive states.** NONCOchip probes and their corresponding transcripts (Gencode v12) that are significantly differentially expressed between more benign versus aggressive states of diffuse astrocytoma (FDR < 0.05). Column headings **Probes**, **Gencode v12 genes**, **Novel** indicate unique number of significantly differentially expressed probes, unique number of these found in exons of known Gencode v12 genes, and unique number of novel probes, respectively. A probe is novel, if it does not overlap with any genotype known in Gencode v12. For Gencode v12 genes the number of significantly differentially expressed probes as well as the unique number of genes these probes map to are provided. Numbers in brackets indicate unique number of *bona fide* non-protein coding Gencode v12 genes.

## 6.4 *Bona fide* non-coding probes overlap with genomic annotation and DE-TARs

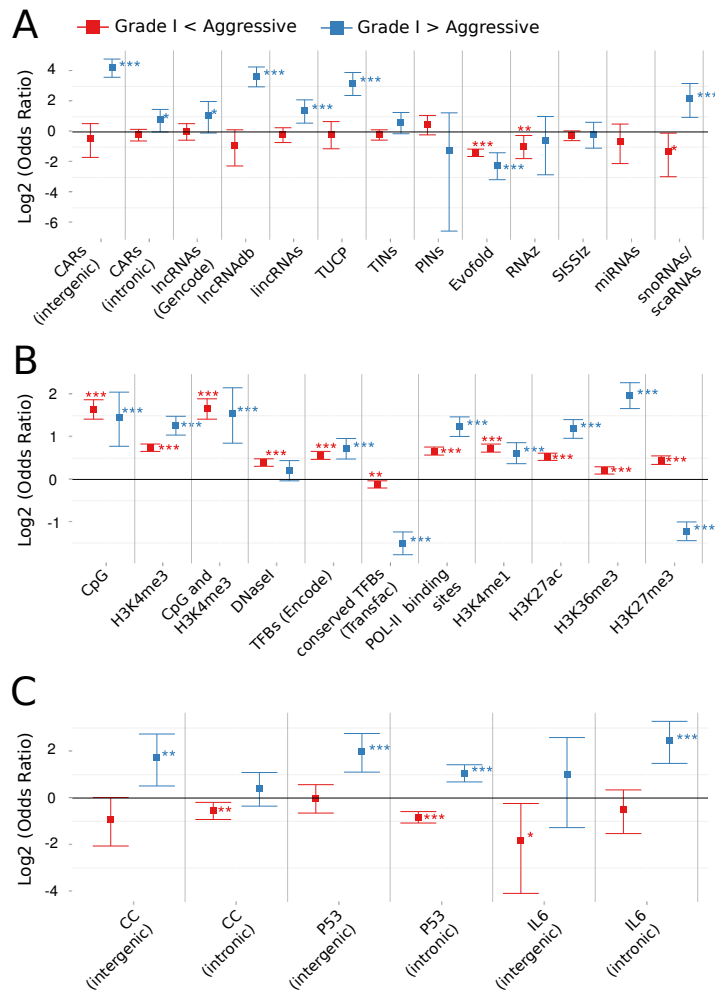

Figure S18: **DE-Probes overlap with different annotation categories.** Overlap of *bona fide* non-coding probes significantly differentially expressed between astrocytoma of grade I versus aggressive states of grade III and IV (FDR < 0.05) with different annotation categories. Grade I > Aggressive, if expression of probe is higher in grade I than in aggressive states of astrocytoma, and Grade I < Aggressive vice versa. Log<sub>2</sub> transformed odds ratios and their 95% confidence interval for the respective annotation dataset are shown (annotations are described in detail in Supplemental Table S28). To assess the significance of the observed overlap, odds ratios of observed versus background (all probes on nONCOchip) relative overlaps are calculated and tested by Fisher's exact test for significant enrichment or depletion. \*\*\* indicates a p-value  $p < 0.001$  of the observed versus random nucleotide overlaps, \*\* a p-value  $p < 0.01$ , and \* a p-value  $p < 0.05$ , respectively. A probe is counted if it maps to at least 90% to an interval in the according annotation. **(A)** Overlap of *bona fide* non-coding probes with several classes of experimentally verified and predicted ncRNAs. **(B)** Overlap of *bona fide* non-coding probes with putative promoter regions, transcription factor binding sites, polII binding sites and epigenetically modified regions. **(C)** Overlap of *bona fide* non-coding probes with *bona fide* non-coding DE-TARs detected in at least one contrast in cell cycle, P53 or STAT3 experiment. For detailed output of Fisher's exact tests refer to Supplemental Tables S20, S21, and S22.

Table S20: ***Bona fide non-coding DE-Probes overlap with known ncRNAs.*** *Bona fide* non-coding DE-Probes overlapping with known ncRNAs. Annotation datasets are described in Supplemental Table S28. Overlaps are calculated by using the Bioconductor `genomeIntervals` package [6]. The significance of the observed overlap is assessed by calculating odds ratios of observed (DE-Probes) versus expected (all probes on microarray) relative overlaps. Odds ratios are calculated and tested by Fisher’s exact test for significant enrichment or depletion (see Materials and Methods). Column heading **Annotation** indicates annotation datasets for which overlap is computed, and **Survey** if overlap is for probes that are higher expressed in astrocytoma of grade I than in aggressive states of grade III and IV (Grade I > Aggressive) or if overlap is for probes that are lower expressed (Grade I < Aggressive). Remaining columns indicate the results (**Odds ratio**, **P-value**, and 95% confidence interval for odds ratio - **95% CI**) and the data (**DE-Probes**: number of differentially expressed probes - FDR < 0.05 - completely overlapping with annotation, i.e. fraction of overlapping probe nucleotides = 1, or non-overlapping with annotation, i.e. fraction of overlapping probe nucleotides < 1; **BG**: number of array probes completely overlapping with annotation, i.e. fraction of overlapping probe nucleotides = 1, or non-overlapping with annotation, i.e. fraction of overlapping probe nucleotides < 1) of Fisher’s exact test.

| Annotation            | Survey               | Fisher’s exact test |          |               | overlap   |      | no overlap |        |
|-----------------------|----------------------|---------------------|----------|---------------|-----------|------|------------|--------|
|                       |                      | Odds ratio          | P-value  | 95% CI        | DE-Probes | BG   | DE-Probes  | BG     |
| CARs<br>(intergenic)  | Grade I > Aggressive | 18.77               | 3.45e-25 | [12.16,27.97] | 28        | 279  | 662        | 123803 |
|                       | Grade I < Aggressive | 0.73                | 5.32e-01 | [0.31, 1.46]  | 8         | 279  | 4852       | 123803 |
| CARs<br>(intron)      | Grade I > Aggressive | 1.73                | 3.52e-02 | [1.00, 2.80]  | 17        | 1786 | 673        | 122296 |
|                       | Grade I < Aggressive | 0.87                | 3.24e-01 | [0.66, 1.13]  | 61        | 1786 | 4799       | 122296 |
| Evofold               | Grade I > Aggressive | 0.22                | 2.74e-11 | [0.11, 0.39]  | 12        | 9259 | 678        | 114823 |
|                       | Grade I < Aggressive | 0.39                | 9.34e-39 | [0.33, 0.46]  | 147       | 9259 | 4713       | 114823 |
| lincRNAs              | Grade I > Aggressive | 2.64                | 6.48e-04 | [1.50, 4.34]  | 16        | 1106 | 674        | 122976 |
|                       | Grade I < Aggressive | 0.88                | 4.82e-01 | [0.62, 1.21]  | 38        | 1106 | 4822       | 122976 |
| lncRNAdb              | Grade I > Aggressive | 12.66               | 1.74e-17 | [7.86,19.49]  | 23        | 337  | 667        | 123745 |
|                       | Grade I < Aggressive | 0.53                | 1.16e-01 | [0.21, 1.10]  | 7         | 337  | 4853       | 123745 |
| lncRNAs<br>(Gencode)  | Grade I > Aggressive | 2.10                | 4.53e-02 | [0.95, 4.03]  | 9         | 777  | 681        | 123305 |
|                       | Grade I < Aggressive | 1.02                | 9.26e-01 | [0.69, 1.46]  | 31        | 777  | 4829       | 123305 |
| PINs                  | Grade I > Aggressive | 0.43                | 7.35e-01 | [0.01, 2.40]  | 1         | 421  | 689        | 123661 |
|                       | Grade I < Aggressive | 1.40                | 1.32e-01 | [0.88, 2.13]  | 23        | 421  | 4837       | 123661 |
| RNAz                  | Grade I > Aggressive | 0.69                | 8.06e-01 | [0.14, 2.03]  | 3         | 783  | 687        | 123299 |
|                       | Grade I < Aggressive | 0.52                | 6.59e-03 | [0.30, 0.85]  | 16        | 783  | 4844       | 123299 |
| miRNAs                | Grade I > Aggressive | 0.00                | 6.45e-01 | [0.00, 2.84]  | 0         | 236  | 690        | 123846 |
|                       | Grade I < Aggressive | 0.65                | 3.96e-01 | [0.24, 1.43]  | 6         | 236  | 4854       | 123846 |
| snoRNAs or<br>scaRNAs | Grade I > Aggressive | 4.57                | 5.25e-04 | [1.95, 9.16]  | 8         | 318  | 682        | 123764 |
|                       | Grade I < Aggressive | 0.40                | 3.84e-02 | [0.13, 0.95]  | 5         | 318  | 4855       | 123764 |
| SISSIz                | Grade I > Aggressive | 0.90                | 8.93e-01 | [0.48, 1.55]  | 13        | 2590 | 677        | 121492 |
|                       | Grade I < Aggressive | 0.85                | 1.37e-01 | [0.67, 1.05]  | 86        | 2590 | 4774       | 121492 |
| TINs                  | Grade I > Aggressive | 1.54                | 8.25e-02 | [0.92, 2.43]  | 19        | 2236 | 671        | 121846 |
|                       | Grade I < Aggressive | 0.88                | 2.95e-01 | [0.69, 1.10]  | 77        | 2236 | 4783       | 121846 |
| TUCP                  | Grade I > Aggressive | 9.25                | 2.67e-11 | [5.29,15.15]  | 17        | 338  | 673        | 123744 |
|                       | Grade I < Aggressive | 0.91                | 8.88e-01 | [0.46, 1.61]  | 12        | 338  | 4848       | 123744 |

**Table S21: *Bona fide* non-coding DE-Probes overlap with regulatory sites and epigenetically modified regions.** Number of *bona fide* non-coding DE-Probes overlapping with putative promoter regions, transcription factor bindings sites and epigenetically modified regions. Annotation datasets are described in Supplemental Table S28. Overlaps are calculated by using the Bioconductor `genomeIntervals` package [6]. The significance of the observed overlap is assessed by calculating odds ratios of observed (DE-Probes) versus expected (all probes on microarray) relative overlaps. Odds ratios are calculated and tested by Fisher’s exact test for significant enrichment or depletion (see Materials and Methods). Column heading **Annotation** indicates annotation datasets for which overlap is computed, and **Survey** if overlap is for probes that are higher expressed in astrocytoma of grade I than in aggressive states of grade III and IV (Grade I > Aggressive) or if overlap is for probes that are lower expressed (Grade I < Aggressive). Remaining columns indicate the results (**Odds ratio**, **P-value**, and 95% confidence interval for odds ratio - **95% CI**) and the data (**DE-Probes**: number of differentially expressed probes - FDR < 0.05 - completely overlapping with annotation, i.e. fraction of overlapping probe nucleotides = 1, or non-overlapping with annotation, i.e. fraction of overlapping probe nucleotides < 1; **BG**: number of array probes completely overlapping with annotation, i.e. fraction of overlapping probe nucleotides = 1, or non-overlapping with annotation, i.e. fraction of overlapping probe nucleotides < 1) of Fisher’s exact test.

| Annotation      | Survey               | Fisher’s exact test |          |             | overlap   |       | no overlap |        |
|-----------------|----------------------|---------------------|----------|-------------|-----------|-------|------------|--------|
|                 |                      | Odds ratio          | P-value  | 95% CI      | DE-Probes | BG    | DE-Probes  | BG     |
| CpG             | Grade I > Aggressive | 2.74                | 3.07e-05 | [1.72,4.16] | 23        | 1543  | 667        | 122539 |
|                 | Grade I < Aggressive | 3.14                | 1.75e-36 | [2.68,3.67] | 185       | 1543  | 4675       | 122539 |
| CpG and H3K4me3 | Grade I > Aggressive | 2.91                | 1.84e-05 | [1.81,4.47] | 22        | 1387  | 668        | 122695 |
|                 | Grade I < Aggressive | 3.17                | 1.03e-33 | [2.68,3.73] | 168       | 1387  | 4692       | 122695 |
| DNaseI          | Grade I > Aggressive | 1.15                | 8.91e-02 | [0.98,1.36] | 214       | 34779 | 476        | 89303  |
|                 | Grade I < Aggressive | 1.32                | 1.62e-18 | [1.24,1.40] | 1648      | 34779 | 3212       | 89303  |
| H3K27ac         | Grade I > Aggressive | 2.28                | 1.09e-26 | [1.96,2.66] | 358       | 39843 | 332        | 84239  |
|                 | Grade I < Aggressive | 1.45                | 2.14e-34 | [1.36,1.54] | 1975      | 39843 | 2885       | 84239  |
| H3k27me3        | Grade I > Aggressive | 0.43                | 2.52e-27 | [0.37,0.50] | 364       | 89668 | 326        | 34414  |
|                 | Grade I < Aggressive | 1.37                | 6.64e-20 | [1.28,1.47] | 3796      | 89668 | 1064       | 34414  |
| H3K36me3        | Grade I > Aggressive | 3.91                | 4.32e-50 | [3.18,4.85] | 582       | 71883 | 108        | 52199  |
|                 | Grade I < Aggressive | 1.16                | 9.31e-07 | [1.09,1.23] | 2987      | 71883 | 1873       | 52199  |
| H3K4me1         | Grade I > Aggressive | 1.53                | 3.61e-07 | [1.29,1.82] | 501       | 78626 | 189        | 45456  |
|                 | Grade I < Aggressive | 1.67                | 7.80e-57 | [1.56,1.78] | 3609      | 78626 | 1251       | 45456  |
| H3K4me3         | Grade I > Aggressive | 2.41                | 1.37e-28 | [2.06,2.80] | 309       | 31281 | 381        | 92801  |
|                 | Grade I < Aggressive | 1.68                | 3.46e-61 | [1.58,1.78] | 1756      | 31281 | 3104       | 92801  |
| POL-II          | Grade I > Aggressive | 2.37                | 1.48e-24 | [2.02,2.78] | 245       | 23396 | 445        | 100686 |
|                 | Grade I < Aggressive | 1.59                | 1.10e-41 | [1.49,1.70] | 1311      | 23396 | 3549       | 100686 |
| TFBs (Transfac) | Grade I > Aggressive | 0.35                | 3.70e-34 | [0.29,0.42] | 149       | 54379 | 541        | 69703  |
|                 | Grade I < Aggressive | 0.92                | 6.11e-03 | [0.87,0.98] | 2033      | 54379 | 2827       | 69703  |
| TFBs (Encode)   | Grade I > Aggressive | 1.65                | 7.35e-09 | [1.40,1.95] | 203       | 24995 | 487        | 99087  |
|                 | Grade I < Aggressive | 1.48                | 5.74e-31 | [1.39,1.58] | 1322      | 24995 | 3538       | 99087  |

Table S22: **Bona fide non-coding DE-Probes overlap with DE-TARs.** Number of *bona fide* non-coding DE-Probes overlapping with DE-TARs. Overlaps are calculated by using the Bioconductor `genomeIntervals` package [6]. The significance of the observed overlap is assessed by calculating odds ratios of observed (DE-Probes) versus expected (all probes on microarray) relative overlaps. Odds ratios are calculated and tested by Fisher’s exact test for significant enrichment or depletion (see Materials and Methods). Column heading **Annotation** indicates annotation datasets for which overlap is computed, and **Survey** if overlap is for probes that are higher expressed in astrocytoma of grade I than in aggressive states of grade III and IV (Grade I > Aggressive) or if overlap is for probes that are lower expressed (Grade I < Aggressive). Remaining columns indicate the results (**Odds ratio**, **P-value**, and 95% confidence interval for odds ratio - **95% CI**) and the data (**DE-Probes**: number of differentially expressed probes - FDR < 0.05 - completely overlapping with annotation, i.e. fraction of overlapping probe nucleotides = 1, or non-overlapping with annotation, i.e. fraction of overlapping probe nucleotides < 1; **BG**: number of array probes completely overlapping with annotation, i.e. fraction of overlapping probe nucleotides = 1, or non-overlapping with annotation, i.e. fraction of overlapping probe nucleotides < 1) of Fisher’s exact test.

| Annotation          | Survey               | Fisher’s exact test |          |             | overlap   |      | no overlap |        |
|---------------------|----------------------|---------------------|----------|-------------|-----------|------|------------|--------|
|                     |                      | Odds ratio          | P-value  | 95% CI      | DE-Probes | BG   | DE-Probes  | BG     |
| CC<br>(intergenic)  | Grade I > Aggressive | 3.35                | 3.49e-03 | [1.43,6.70] | 8         | 433  | 682        | 123649 |
|                     | Grade I < Aggressive | 0.53                | 5.92e-02 | [0.24,1.02] | 9         | 433  | 4851       | 123649 |
| CC<br>(intron)      | Grade I > Aggressive | 1.34                | 2.15e-01 | [0.79,2.13] | 18        | 2437 | 672        | 121645 |
|                     | Grade I < Aggressive | 0.69                | 2.07e-03 | [0.53,0.88] | 66        | 2437 | 4794       | 121645 |
| P53<br>(intergenic) | Grade I > Aggressive | 3.99                | 2.27e-05 | [2.16,6.80] | 14        | 640  | 676        | 123442 |
|                     | Grade I < Aggressive | 1.00                | 1.00e+00 | [0.64,1.49] | 25        | 640  | 4835       | 123442 |
| P53<br>(intron)     | Grade I > Aggressive | 2.10                | 6.91e-08 | [1.61,2.69] | 71        | 6436 | 619        | 117646 |
|                     | Grade I < Aggressive | 0.57                | 3.69e-13 | [0.48,0.67] | 146       | 6436 | 4714       | 117646 |
| IL6<br>(intergenic) | Grade I > Aggressive | 2.03                | 1.88e-01 | [0.42,6.03] | 3         | 266  | 687        | 123816 |
|                     | Grade I < Aggressive | 0.29                | 1.54e-02 | [0.06,0.85] | 3         | 266  | 4857       | 123816 |
| IL6<br>(intron)     | Grade I > Aggressive | 5.49                | 4.16e-06 | [2.80,9.75] | 12        | 399  | 678        | 123683 |
|                     | Grade I < Aggressive | 0.70                | 2.98e-01 | [0.35,1.27] | 11        | 399  | 4849       | 123683 |

## 6.5 Proximal ncRNA – mRNA pairs

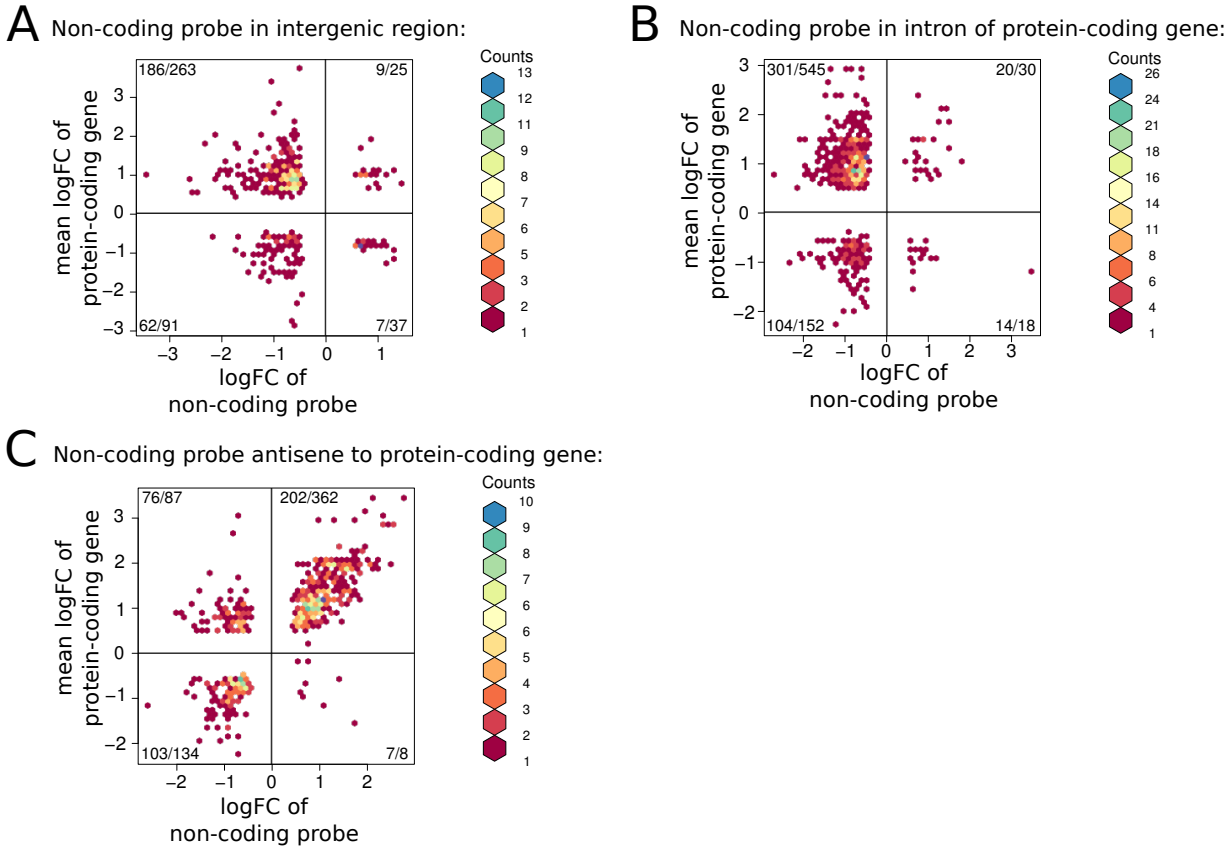

**Figure S19: Proximal ncRNA – mRNA pairs.** For *bona fide* non-coding probes significantly differentially expressed ( $FDR < 0.05$ ) between astrocytoma of grade I and aggressive states (grade III or IV) the protein-coding gene (Gencode release v12) with closest genome coordinates was identified, and the pair retained if the protein-coding gene was differentially expressed at the same FDR. All pairs including a protein-coding gene with inconsistent probes, i.e. fold changes of significant probes mapping to exons of the gene exhibit opposite signs, were discarded. Log<sub>2</sub> fold change of the *bona fide* non-coding probe (*x*-axis) and the average log<sub>2</sub> fold change of protein-coding gene (*y*-axis) is depicted as a bivariate histogram using hexagonal binning (R package `hexbin`). Pairs with converse fold changes are shown in the left upper and right lower quadrant. Pairs with consistent fold changes but opposite reading direction are shown in the left lower and right upper quadrant. Numbers in quadrant correspond to number of unique genes/number of unique pairs depicted. **(A)** Proximal pairs, where the *bona fide* non-coding probe is intergenic. **(B)** Pairs where the *bona fide* non-coding probes is in an intron of the protein-coding gene. **(C)** Pairs where the *bona fide* non-coding probe and the protein-coding gene are on opposite strands and overlap at least partially.



Table S23: **Protein-coding genes proximal to *bona fide* non-coding DE-Probes and related to astrocytoma.** Several ncRNAs associated with different grades of glioma are transcribed from loci in the proximity of differentially expressed mRNAs with well known functions in glioma. Column heading **Location** denotes the genomic location of the *bona fide* non-coding DE-Probe relative to the astrocytoma related protein-coding gene (**mRNA**).

| Location   | mRNA                            | Role                                                                                 | Reference |
|------------|---------------------------------|--------------------------------------------------------------------------------------|-----------|
| intergenic | CTNNB1                          | A pivotal GBM oncogene.                                                              | [26]      |
|            | IGF1                            | Found to be associated with astrocytoma.                                             | [27]      |
|            | KLF6                            | A tumor suppressor for astrocytoma.                                                  | [28]      |
|            | KLF9                            | Inhibitor of GBM-initiating stem cells.                                              | [29]      |
|            | MET                             | A regulator of GBM stem cells.                                                       | [30]      |
|            | PTPRD                           | A tumor suppressor for astrocytoma.                                                  | [31]      |
|            | SMAD2                           | Negative prognostic factor and component of TGF $\beta$ .                            | [32]      |
|            | SULF2                           | A regulator of GBM cell growth.                                                      | [33]      |
| intronic   | CDH2                            | Found to promote glioblastoma cell migration upon cleavage by a proteinase.          | [34]      |
|            | CDKN1A (p21)                    | The main target of p53 and suppressor of glioblastoma cell growth.                   | [35]      |
|            | GAB1                            | A component of EGFR signaling relevant in glioblastoma.                              | [36]      |
|            | HDAC1                           | A drug target in the disease.                                                        | [35]      |
|            | ITGA7                           | Frequently mutated in GBM.                                                           | [37]      |
|            | KLF6                            | A tumor suppressor for astrocytoma.                                                  | [28]      |
|            | KLF9                            | Inhibitor of GBM-initiating stem cells.                                              | [29]      |
|            | LRP1                            | Promoter of GBM cell invasion.                                                       | [38]      |
|            | SOX6                            | A GBM antigen.                                                                       | [39]      |
|            | WHSC1                           | A promoter of GBM proliferation.                                                     | [40]      |
| antisense  | BIRC5                           | A negative prognostic factor and drug target in GBM.                                 | [41]      |
|            | CCND1                           | Associated with negative prognosis.                                                  | [42]      |
|            | CDKN1A (p21)                    | The main target of p53 and suppressor of glioblastoma cell growth.                   | [35]      |
|            | CST3                            | Involved in invasiveness.                                                            | [43]      |
|            | CTNNA1                          | Inhibiting migration, invasion and proliferation of glioma cells.                    | [44]      |
|            | EMC10 (HSS1)                    | An inhibitor of GBM cell growth.                                                     | [45]      |
|            | LGALS1                          | Involved in growth, invasion, and chemoresistance.                                   | [46]      |
|            | LRP1                            | Promoter of GBM cell invasion.                                                       | [38]      |
|            | MARCKS                          | Involved in invasion.                                                                | [47]      |
|            | MKI67                           | Used as proliferation marker for GBM in histological grading (KI-67 labeling index). | [48]      |
|            | NTN1                            | An autocrine inhibitor of glioma cell motility.                                      | [49]      |
|            | PDGFRA                          | Frequently amplified in astrocytoma.                                                 | [50, 51]  |
|            | PFKFB3                          | Overexpressed in high grades.                                                        | [52]      |
|            | PHF3                            | Is frequently downregulated or lost.                                                 | [53]      |
| SULF2      | A regulator of GBM cell growth. | [33]                                                                                 |           |

**Table S24: GO term enrichment for protein-coding genes proximal to *bona fide* non-coding DE-Probes in intergenic space.** Most enriched GO terms (P-value <  $5 \times 10^{-2}$ , ontology Biological Process) of significantly differentially expressed genes (Gencode release 12) with a significantly differentially expressed *bona fide* non-coding probe in intergenic space (FDR < 0.05). Column headings indicate ID of GO term (**ID**), significance of enrichment (**P-value**), odds ratios (**Odds ratio**), expected number of genes associated with tested GO term (**Exp. count**), number of significantly differentially expressed genes associated with this GO term (**Count**), number of genes from the gene universe that are annotated at this GO term (**Size**), and the GO term itself (**Term**). Analysis was done by using the Bioconductor *GOstats* package. Mapping of genes to GO terms is based on the NCBI gene information table (version: July 1, 2012). GO terms with evidence codes *IEA* were removed in order to discard automatically annotated relations. Significance of enrichment was assessed by a one-sided hypergeometric test where the universe contains all genes of the nONCOchip which passed unspecific filtering (Materials and Methods). Number of genes in universe: 6933. Number of genes in universe mapped to ontology: 4624. Number of selected genes: 257. Number of selected genes mapped to ontology and universe: 170.

| ID         | P-value   | Odds ratio | Exp. count | Count | Size | Term                                                           |
|------------|-----------|------------|------------|-------|------|----------------------------------------------------------------|
| GO:0051239 | 3.031E-06 | 3.191      | 9.794      | 26    | 281  | regulation of multicellular organismal process                 |
| GO:0051960 | 1.142E-05 | 4.347      | 4.118      | 15    | 112  | regulation of nervous system development                       |
| GO:0006355 | 1.024E-04 | 1.987      | 30.221     | 50    | 822  | regulation of transcription, DNA-dependent                     |
| GO:0045664 | 1.089E-04 | 4.986      | 2.392      | 10    | 66   | regulation of neuron differentiation                           |
| GO:0060284 | 2.948E-04 | 3.709      | 3.727      | 12    | 103  | regulation of cell development                                 |
| GO:0010976 | 6.926E-04 | 13.392     | 0.441      | 4     | 12   | positive regulation of neuron projection development           |
| GO:0019219 | 7.818E-04 | 1.918      | 23.755     | 39    | 673  | regulation of nucleobase-containing compound metabolic process |
| GO:0050773 | 7.980E-04 | 8.405      | 0.772      | 5     | 21   | regulation of dendrite development                             |
| GO:0010628 | 9.356E-04 | 2.144      | 13.676     | 26    | 372  | positive regulation of gene expression                         |
| GO:0019222 | 1.130E-03 | 1.766      | 36.312     | 53    | 1046 | regulation of metabolic process                                |
| GO:0031344 | 1.402E-03 | 3.775      | 2.721      | 9     | 74   | regulation of cell projection organization                     |
| GO:0048813 | 1.849E-03 | 6.718      | 0.919      | 5     | 25   | dendrite morphogenesis                                         |
| GO:0032501 | 1.971E-03 | 1.773      | 31.188     | 46    | 1006 | multicellular organismal process                               |
| GO:0032774 | 2.113E-03 | 1.690      | 34.228     | 50    | 931  | RNA biosynthetic process                                       |
| GO:0060021 | 2.269E-03 | 8.920      | 0.588      | 4     | 16   | palate development                                             |
| GO:0048699 | 2.382E-03 | 2.077      | 12.316     | 23    | 335  | generation of neurons                                          |
| GO:0050769 | 2.648E-03 | 6.105      | 0.993      | 5     | 27   | positive regulation of neurogenesis                            |
| GO:0050807 | 2.883E-03 | 8.232      | 0.625      | 4     | 17   | regulation of synapse organization                             |
| GO:0021953 | 2.883E-03 | 8.232      | 0.625      | 4     | 17   | central nervous system neuron differentiation                  |
| GO:0050770 | 3.670E-03 | 5.593      | 1.066      | 5     | 29   | regulation of axonogenesis                                     |
| GO:0022604 | 3.682E-03 | 2.997      | 3.713      | 10    | 101  | regulation of cell morphogenesis                               |
| GO:0051130 | 4.123E-03 | 2.525      | 5.678      | 13    | 156  | positive regulation of cellular component organization         |
| GO:0051101 | 4.433E-03 | 7.131      | 0.699      | 4     | 19   | regulation of DNA binding                                      |
| GO:0003013 | 4.551E-03 | 3.387      | 2.647      | 8     | 72   | circulatory system process                                     |



**Table S25: GO term enrichment for protein-coding genes with *bona fide* non-coding DE-Probes in introns.** Most enriched GO terms (P-value <  $5 \times 10^{-2}$ , ontology Biological Process) of significantly differentially expressed genes (Gencode release 12) with a significantly differentially expressed *bona fide* non-coding probe in intron (FDR < 0.05). Column headings indicate ID of GO term (**ID**), significance of enrichment (**P-value**), odds ratios (**Odds ratio**), expected number of genes associated with tested GO term (**Exp. count**), number of significantly differentially expressed genes associated with this GO term (**Count**), number of genes from the gene universe that are annotated at this GO term (**Size**), and the GO term itself (**Term**). Analysis was done by using the Bioconductor *GOSTATS* package. Mapping of genes to GO terms is based on the NCBI gene information table (version: July 1, 2012). GO terms with evidence codes *IEA* were removed in order to discard automatically annotated relations. Significance of enrichment was assessed by a one-sided hypergeometric test where the universe contains all genes of the nONCOchip which passed unspecific filtering (Materials and Methods). Number of genes in universe: 6933. Number of genes in universe mapped to ontology: 4624. Number of selected genes: 417. Number of selected genes mapped to ontology and universe: 292.

| ID         | P-value   | Odds ratio | Exp. count | Count | Size | Term                                                           |
|------------|-----------|------------|------------|-------|------|----------------------------------------------------------------|
| GO:0010646 | 5.575E-05 | 1.999      | 28.164     | 49    | 446  | regulation of cell communication                               |
| GO:0035113 | 6.480E-05 | 9.648      | 1.137      | 7     | 18   | embryonic appendage morphogenesis                              |
| GO:0035108 | 3.793E-04 | 6.625      | 1.452      | 7     | 23   | limb morphogenesis                                             |
| GO:0030035 | 4.116E-04 | 8.241      | 1.074      | 6     | 17   | microspike assembly                                            |
| GO:0035637 | 8.154E-04 | 2.092      | 14.966     | 28    | 237  | multicellular organismal signaling                             |
| GO:0065007 | 8.159E-04 | 1.507      | 175.301    | 201   | 2776 | biological regulation                                          |
| GO:0010718 | 8.196E-04 | 9.416      | 0.821      | 5     | 13   | positive regulation of epithelial to mesenchymal transition    |
| GO:0048736 | 8.635E-04 | 5.575      | 1.642      | 7     | 26   | appendage development                                          |
| GO:0023051 | 9.318E-04 | 1.658      | 39.973     | 59    | 633  | regulation of signaling                                        |
| GO:0070482 | 1.087E-03 | 3.711      | 3.221      | 10    | 51   | response to oxygen levels                                      |
| GO:0019219 | 1.355E-03 | 1.521      | 64.349     | 86    | 1019 | regulation of nucleobase-containing compound metabolic process |
| GO:0071456 | 1.455E-03 | 6.038      | 1.326      | 6     | 21   | cellular response to hypoxia                                   |
| GO:0008624 | 1.690E-03 | 3.222      | 3.978      | 11    | 63   | induction of apoptosis by extracellular signals                |
| GO:0031644 | 1.951E-03 | 3.692      | 2.905      | 9     | 46   | regulation of neurological system process                      |
| GO:0042733 | 2.414E-03 | 10.014     | 0.631      | 4     | 10   | embryonic digit morphogenesis                                  |
| GO:0045668 | 3.606E-03 | 8.581      | 0.695      | 4     | 11   | negative regulation of osteoblast differentiation              |
| GO:0009968 | 3.830E-03 | 2.054      | 11.269     | 21    | 180  | negative regulation of signal transduction                     |
| GO:0012502 | 3.862E-03 | 2.093      | 10.546     | 20    | 167  | induction of programmed cell death                             |

**Table S26: GO term enrichment for protein-coding genes with antisense *bona fide* non-coding DE-Probes.** Most enriched GO terms (P-value <  $5 \times 10^{-2}$ , ontology Biological Process) of significantly differentially expressed genes (Gencode release 12) with a significantly differentially expressed *bona fide* non-coding probe on the antisense strand (FDR < 0.05). Column headings indicate ID of GO term (**ID**), significance of enrichment (**P-value**), odds ratios (**Odds ratio**), expected number of genes associated with tested GO term (**Exp. count**), number of significantly differentially expressed genes associated with this GO term (**Count**), number of genes from the gene universe that are annotated at this GO term (**Size**), and the GO term itself (**Term**). Analysis was done by using the Bioconductor *GOstats* package. Mapping of genes to GO terms is based on the NCBI gene information table (version: July 1, 2012). GO terms with evidence codes *IEA* were removed in order to discard automatically annotated relations. Significance of enrichment was assessed by a one-sided hypergeometric test where the universe contains all genes of the nONCOchip which passed unspecific filtering (Materials and Methods). Number of genes in universe: 6933. Number of genes in universe mapped to ontology: 4624. Number of selected genes: 365. Number of selected genes mapped to ontology and universe: 263.

| ID         | P-value   | Odds ratio | Exp. count | Count | Size | Term                                                         |
|------------|-----------|------------|------------|-------|------|--------------------------------------------------------------|
| GO:0060491 | 4.962E-05 | 9.910      | 1.081      | 7     | 19   | regulation of cell projection assembly                       |
| GO:0051494 | 6.270E-05 | 7.569      | 1.479      | 8     | 26   | negative regulation of cytoskeleton organization             |
| GO:0031110 | 3.321E-04 | 8.461      | 1.024      | 6     | 18   | regulation of microtubule polymerization or depolymerization |
| GO:0030203 | 4.625E-04 | 7.808      | 1.081      | 6     | 19   | glycosaminoglycan metabolic process                          |
| GO:0030154 | 7.022E-04 | 1.723      | 35.437     | 54    | 629  | cell differentiation                                         |
| GO:0045664 | 7.085E-04 | 3.188      | 4.721      | 13    | 83   | regulation of neuron differentiation                         |
| GO:0048015 | 8.966E-04 | 4.686      | 2.104      | 8     | 37   | phosphatidylinositol-mediated signaling                      |
| GO:0030195 | 1.635E-03 | 11.210     | 0.569      | 4     | 10   | negative regulation of blood coagulation                     |
| GO:0048731 | 2.461E-03 | 1.562      | 46.110     | 64    | 826  | system development                                           |
| GO:0050793 | 2.737E-03 | 1.750      | 23.320     | 37    | 410  | regulation of developmental process                          |
| GO:0032886 | 3.022E-03 | 4.231      | 1.991      | 7     | 35   | regulation of microtubule-based process                      |
| GO:0051130 | 3.045E-03 | 2.241      | 8.896      | 18    | 158  | positive regulation of cellular component organization       |
| GO:0046503 | 3.520E-03 | 8.403      | 0.683      | 4     | 12   | glycerolipid catabolic process                               |
| GO:0006639 | 3.573E-03 | 4.085      | 2.048      | 7     | 36   | acylglycerol metabolic process                               |
| GO:0031333 | 4.383E-03 | 5.615      | 1.138      | 5     | 20   | negative regulation of protein complex assembly              |
| GO:0032411 | 4.860E-03 | 7.468      | 0.739      | 4     | 13   | positive regulation of transporter activity                  |
| GO:0009914 | 4.953E-03 | 3.118      | 3.299      | 9     | 58   | hormone transport                                            |

## 7 Supplemental material and methods

### 7.1 Primers for RT-PCR and ChIP

Table S27: Primer and probe sequences used for PCR. All primers were synthesized by Eurofins MWG Operon (Ebersberg, Germany). Taqman probes were purchased from Roche Diagnostics (Mannheim, Germany) or Metabion (Martinsried, Germany), as indicated.

| Assay                                  | Forward                   | Reverse                   | Probe                                        |
|----------------------------------------|---------------------------|---------------------------|----------------------------------------------|
| Tissue distribution of STAiRs          |                           |                           |                                              |
| STAiR1                                 | CTCAGTTTGGCATCCG-TTTT     | ATTGACTTCCCAGGCC-TTTT     | -                                            |
| STAiR2                                 | GTGAAGGGGCATGTTG-AGAT     | GGTGCTAGCCCTGAAG-TCTG     | -                                            |
| STAiR18                                | GGAACACTCTGAAAAAC-ACCAA   | TGAGAATACATATGT-GTGCAAGGA | -                                            |
| GAPDH                                  | AGCCACATCGCTCAGA-CAC      | GCCCAATACGACCAA-ATCC      | -                                            |
| STAiR1 expression time course and ChIP |                           |                           |                                              |
| GAPDH                                  | AGCCACATCGCTCAGA-CAC      | GCCCAATACGACCAA-ATCC      | TGGGGAAG (#60 Roche Universal ProbeLibrary)  |
| $\beta$ -actin                         | TCGTGCGTGACATTAA-GGAGAA   | AGCAGCCGTGGCCATCT         | TACGTCGCCCTGGACTT-CGAGCA (Metabion)          |
| STAiR1-P1                              | GCAGTCCCTTATACT-TACCATCAA | CTTACCACATTCGC-TGTAGATAGG | TCCTCTTCT (#35 Roche Universal ProbeLibrary) |
| STAiR1-P2                              | GGCACACACAGATTTTTCAGTG    | TTGGATCCTCTTGACTTC-TGTCT  | CAGCCTCC (#75 Roche Universal ProbeLibrary)  |
| STAiR1-P3                              | CATGGTGGTACGTGCC-TGT      | CCCCTACCTCATGGGTT-TAAG    | GGAGGCTG (#75 Roche Universal ProbeLibrary)  |
| STAiR1-P4                              | TACCATGATGTGACGAT-TCAGA   | AGCCACCTCATGTACCC-AGA     | GGAGGCAG (#16 Roche Universal ProbeLibrary)  |
| STAiR1-P5                              | CTGGCCAGGGCAGAATTA        | GCAAACAGGGACAATT-TGACT    | CAGGAGAA (#2 Roche Universal ProbeLibrary)   |
| STAiR1-P6                              | CAAACAATTTCTTGAAG-CGAT    | GGGAGAACCAGGCTAT-TATGG    | CAGGAGAA (#1 Roche Universal ProbeLibrary)   |

## 7.2 Annotation categories

For a complete annotation of known protein-coding genes we relied on RefSeq [54], UCSC [55], Ensembl [56], and Gencode v12 [57]. The first three datasets were downloaded from the University of California Santa Cruz (UCSC) table browser (hg19), while Gencode annotation were directly taken from <http://www.gencodegenes.org/releases/12.html>. For all sets the genomic coordinates of protein-coding genes, protein-coding transcript isoforms, and protein-coding exons (CDS) were used to define the coordinates of known protein-coding genes, transcript variants and exons, respectively. Intronic regions were defined by intervals annotated as an intron in at least one of the gene annotations sets above, but never annotated as an exon of a protein-coding transcript. Intergenic regions were defined as the complement of all protein-coding transcript variants known in at least one of the above annotation sets. For untranslated regions (UTRs) and pseudogenes we relied solely on the coordinates as defined in Gencode v12.

Annotation for known non-coding RNA genes has been collected from different sites: (1) A set of *bona fide* intergenic long non-coding RNAs was constructed from the 18855 transcripts defined in the long non-coding RNA dataset of Gencode v12. In order to exclude non-coding isoforms of protein-coding genes and antisense RNAs (which are not detectable by tiling arrays), we discarded all those transcripts that overlapped at least one known protein-coding transcript, no matter of reading direction (Gencode v12 - 7401 transcripts; UCSC, Ensembl, and RefSeq protein-coding genes - 8671). To further exclude transcripts predicted to contain conserved short open reading frames, we discarded all those transcripts with an exon that overlapped a significant RNaCode [58] segment ( $p\text{-value} < 0.05$ , 7500 transcripts), or if not scored by RNaCode, an exon that overlaps a significant `tblastn` hit ( $E\text{-value} < 0.05$ , RefSeq database from March 7, 2012; 8848 transcripts). The filtering steps resulted in 5209 long non-coding transcripts which corresponded to 3814 non-coding genes. (2) Large intergenic non-coding RNAs (lincRNAs) and transcripts of uncertain coding potential (TUCPs) as detected in a comprehensive expression study across 22 human tissues and cell lines have been downloaded from the Human Body Map catalog ([http://www.broadinstitute.org/genome\\_bio/human\\_lincrnas/](http://www.broadinstitute.org/genome_bio/human_lincrnas/)) [59]. (3) Genomic coordinates of large RNAs found in chromatin were taken from [60]. (4) Sequences of validated large non-coding RNAs were downloaded from the lincRNAdb database [61] and mapped to the human genome version hg19 by employing BLAT [62] with parameters `-trimHardA -minIdentity=95`. (5) Genomic coordinates of known short RNAs, like miRNAs and snoRNAs, were downloaded from the wgRNA track available from the UCSC table browser, and split in a subset containing the precursors of miRNAs and a subset of C/D box and H/ACA box snoRNAs as well as small Cajal body-specific RNAs (scaRNAs) [63, 64]. (6) Human intronic non-coding RNAs [65] were downloaded from the UCSC Genome Browser mirror for functional RNA (<http://www.ncrna.org/global/cgi-bin/hgGateway>) and mapped to hg19. Original sets of totally intronic non-coding RNAs (TINs) and partially intronic non-coding RNAs (PINs) were reannotated according to Gencode v12 gene annotation (no matter of reading direction) in order to receive reliable sets of intronic non-coding RNAs. 31023 TINs out of 55126 original TINs mapping to hg19 are completely found in introns and did not overlap with conserved open reading frames as detected by RNaCode ( $p\text{-value} < 0.05$ ), or did not exhibit sequence similarity to known human amino acid sequences (`tblastn`, RefSeq database from March 7, 2012,  $E\text{-value} < 0.05$ ) if RNaCode could not be applied due to low sequence conservation. 621 intronic non-coding RNAs classified as TINs in [65] overlapped Gencode v12 exons and were assigned to the set of partially intronic non-coding RNAs (PINs). 6268 PINs out of 12589 PINs

mapping to hg19 were partially found in introns and did not overlap with conserved short open reading frames detected in introns (`RNAcode`,  $p\text{-value} < 0.05$ ). 141 intronic non-coding RNAs originally annotated as PINs did not overlap `Gencode v12` exons and, hence, have been added to the set of totally intronic non-coding RNAs (TINs).

The number of DE-TAR segments with conserved secondary structure was retrieved by mapping their coordinates to genomic regions known to contain conserved secondary structure elements (`EvoFold` [66], `RNAz 2.0` [67, 68], and `SISSIZ` [69]). For `RNAz` and `SISSIZ` we relied on high scoring predictions from *Smith et al.* [70].

We retrieved genomic coordinates of selected histone modifications from the `Encode` consortium [71] in order to assess independent evidence for transcription initiation and elongation (including data for 6 normal cell lines, 1 cancer, and 1 embryonic stem cell line). To detect differential expression of known promoter-sites we relied on the histone modification H3K4 trimethylation, which marks promoter regions of actively transcribed genes [72, 73]. This chromatin mark often co-occurs with CpG islands, which are also associated with transcription start sites [74, 75]. In addition DNaseI-hypersensitive sites define regions where the chromatin structure is changed in a way such that transcription factor binding is possible [73, 76]. The genomic coordinates of transcription factor binding sites (TFBs) corresponded to binding sites identified by ChIP-seq [71] or found to be conserved within human/mouse/rat alignments [77]. PolIII binding sites were also derived from `Encode` to assess the fraction of DE-TAR segments possibly transcribed by Polymerase II. A transcribed region of polIII transcripts is marked by H3K36me3 [78], while transcriptional repression of a region is marked by H3k27me3 [79]. In contrast, H3K4me1 is associated with enhancer regions, but not with transcription start sites [80, 73], and H3K27Ac is associated with enhancer and promoter sites [71, 81, 82].

We used the R library `genomeIntervals` [6] to revise and adapt all annotation sets. A detailed listing of annotations sets and their sources is provided in Supplemental Table S28.



**Table S28: Detailed documentation of annotation categories used for enrichment analyses and general comparison of differentially expressed regions with known annotation sets.** Column headings **Annotation**, **Abbreviation**, **Source/URL**, **Assembly**, **Citation**, and **Comment** indicate the according genomic feature, the abbreviation used in figures and tables throughout the paper, the online source of the annotation data set, the human genome assembly for which annotation was available, references, and comments about required preprocessing of the annotation data, respectively.

| Annotation                       | Abbreviation      | Source/URL                                                                                                                                                                                                                                              | Assembly    | Citation                                                 | Comment                                                                                                                                                                                            |
|----------------------------------|-------------------|---------------------------------------------------------------------------------------------------------------------------------------------------------------------------------------------------------------------------------------------------------|-------------|----------------------------------------------------------|----------------------------------------------------------------------------------------------------------------------------------------------------------------------------------------------------|
| Protein-coding gene annotation   |                   |                                                                                                                                                                                                                                                         |             |                                                          |                                                                                                                                                                                                    |
| Coding exons                     | CDS               | Gencode v12                                                                                                                                                                                                                                             | GRCh37/hg19 | Gencode [57]                                             | -                                                                                                                                                                                                  |
| Introns                          | intron            | Gencode v12 and UCSC table browser (tracks: UCSC genes, RefSeq genes, Ensembl genes)                                                                                                                                                                    | GRCh37/hg19 | Gencode [57], Ensembl [56], RefSeq [54], UCSC [55]; [83] | Defined as intronic nucleotides which do not overlap any exon of a protein-coding transcript.                                                                                                      |
| Intergenic                       | intergenic        | Gencode v12 and UCSC table browser (tracks: UCSC genes, RefSeq genes, Ensembl genes)                                                                                                                                                                    | GRCh37/hg19 | Gencode [57], Ensembl [56], RefSeq [54], UCSC [55]; [83] | Defined as the complement of all known protein-coding transcripts.                                                                                                                                 |
| UTRs                             | UTRs              | Gencode v12                                                                                                                                                                                                                                             | GRCh37/hg19 | Gencode [57]                                             | -                                                                                                                                                                                                  |
| Non-coding gene annotation       |                   |                                                                                                                                                                                                                                                         |             |                                                          |                                                                                                                                                                                                    |
| Long non-coding RNAs             | lncRNAs (Gencode) | <a href="ftp://ftp.sanger.ac.uk/pub/gencode/release_12/gencode.v12.long_noncoding_RNAs.gtf.gz">ftp://ftp.sanger.ac.uk/pub/gencode/release_12/gencode.v12.long_noncoding_RNAs.gtf.gz</a>                                                                 | GRCh37/hg19 | Gencode [57]                                             | The original set of long non-coding RNAs as annotated in Gencode was reduced to a set of <i>bona fide</i> non-coding RNAs without any evidence for functional short ORFs (see descriptions above). |
| Large intergenic non-coding RNAs | lincRNAs          | <a href="http://www.broadinstitute.org/genome_bio/human_lincrnas/sites/default/files/lincRNA_catalog/lincRNAs_transcripts.bed">http://www.broadinstitute.org/genome_bio/human_lincrnas/sites/default/files/lincRNA_catalog/lincRNAs_transcripts.bed</a> | GRCh37/hg19 | [59]                                                     | -                                                                                                                                                                                                  |

| Annotation                                      | Abbreviation             | Source/URL                                                                                                                                                                                                                                                      | Assembly    | Citation     | Comment                                                                                                                                                                          |
|-------------------------------------------------|--------------------------|-----------------------------------------------------------------------------------------------------------------------------------------------------------------------------------------------------------------------------------------------------------------|-------------|--------------|----------------------------------------------------------------------------------------------------------------------------------------------------------------------------------|
| Transcripts of uncertain coding potential       | TUCP                     | <a href="http://www.broadinstitute.org/genome_bio/human_lincnas/sites/default/files/TUCP_transcripts_catalog/TUCP_transcripts.gtf">http://www.broadinstitute.org/genome_bio/human_lincnas/sites/default/files/TUCP_transcripts_catalog/TUCP_transcripts.gtf</a> | GRCh37/hg19 | [59]         | -                                                                                                                                                                                |
| Chromatin associated RNAs                       | CARs                     | -                                                                                                                                                                                                                                                               | NCBI36/hg18 | [60]         | Mapped to GRCh37/hg19 using liftOver [83].                                                                                                                                       |
| LncRNADB                                        | lncRNADB                 | <a href="http://lncrnadb.com">http://lncrnadb.com</a>                                                                                                                                                                                                           | -           | [61]         | Coordinates in GRCh37/hg19 have been derived by BLAT [62] with parameters <code>-trimHardA -minIdentity=95</code> .                                                              |
| Short RNAs                                      | miRNAs, snoRNAs, scaRNAs | UCSC table browser (track: sno/miRNA)                                                                                                                                                                                                                           | GRCh37/hg19 | [63, 64, 83] | -                                                                                                                                                                                |
| Intronic non-coding RNAs                        | TINs, PINs               | UCSC Browser for functional RNA ( <a href="http://www.ncrna.org/global/cgi-bin/hgGateway">http://www.ncrna.org/global/cgi-bin/hgGateway</a> )                                                                                                                   | NCBI36/hg18 | [65]         | Mapped to GRCh37/hg19 using liftOver [83]. The original set of human intronic non-coding RNAs [65] was reassessed according to gene annotation in hg19 (see descriptions above). |
| <b>Regions of conserved secondary structure</b> |                          |                                                                                                                                                                                                                                                                 |             |              |                                                                                                                                                                                  |
| RNAZ                                            | RNAZ                     | -                                                                                                                                                                                                                                                               | GRCh37/hg19 | [70]         | -                                                                                                                                                                                |
| SISSIZ                                          | SISSIZ                   | -                                                                                                                                                                                                                                                               | GRCh37/hg19 | [70]         | -                                                                                                                                                                                |
| EvoFold                                         | EvoFold                  | UCSC table browser (track: EvoFold)                                                                                                                                                                                                                             | GRCh37/hg19 | [66, 83]     | -                                                                                                                                                                                |
| <b>Regulation Tracks</b>                        |                          |                                                                                                                                                                                                                                                                 |             |              |                                                                                                                                                                                  |
| H3K4 trimethylation                             | H3K4me3                  | <a href="ftp://hgdownload.cse.ucsc.edu/goldenPath/hg18/encodeDCC/wgEncodeBroadChIPSeq/">ftp://hgdownload.cse.ucsc.edu/goldenPath/hg18/encodeDCC/wgEncodeBroadChIPSeq/</a>                                                                                       | NCBI36/hg18 | [71, 83]     | Chromatin-mark associated with promoter sites [72, 73]. Mapped to GRCh37/hg19 using liftOver [83].                                                                               |
| CpG islands                                     | CpG                      | UCSC table browser (track: CpG Islands)                                                                                                                                                                                                                         | GRCh37/hg19 | [84, 83]     | Associated with transcription start sites [74, 75].                                                                                                                              |
| DNaseI-hypersensitive sites                     | DNaseI                   | UCSC table browser (track: DNaseI Clusters)                                                                                                                                                                                                                     | GRCh37/hg19 | [71, 83]     | Associated with transcription factor binding sites [73, 76].                                                                                                                     |

| Annotation                                | Abbreviation    | Source/URL                                                                    | Assembly    | Citation | Comment                                                                                                                |
|-------------------------------------------|-----------------|-------------------------------------------------------------------------------|-------------|----------|------------------------------------------------------------------------------------------------------------------------|
| Transcription factor binding sites (TFBs) | TFBs (Encode)   | UCSC table browser (track: Txn Factor ChIP)                                   | GRCh37/hg19 | [71, 83] | Binding sites identified by ChIP-seq [71].                                                                             |
| Transcription factor binding sites (TFBs) | TFBs (Transfac) | UCSC table browser (track: TFBS Conserved)                                    | GRCh37/hg19 | [77, 83] | Binding sites conserved in human, mouse and rat from Transfac Matrix Database (v7.0) [77].                             |
| PoIII binding sites                       | POL-II          | ftp://hgdownload.cse.ucsc.edu/goldenPath/hg18/encodeDCC/wgEncodeBroadChIPSeq/ | NCBI36/hg18 | [71, 83] | PoIII binding sites derived by ChIP-seq [71]. Mapped to GRCh37/hg19 using liftOver [83].                               |
| H3K36 trimethylation                      | H3K36me3        | ftp://hgdownload.cse.ucsc.edu/goldenPath/hg18/encodeDCC/wgEncodeBroadChIPSeq/ | NCBI36/hg18 | [71, 83] | Chromatin-mark associated with active regions of PoII transcripts [78]. Mapped to GRCh37/hg19 using liftOver [83].     |
| H3K27 trimethylation                      | H3K27me3        | ftp://hgdownload.cse.ucsc.edu/goldenPath/hg18/encodeDCC/wgEncodeBroadChIPSeq/ | NCBI36/hg18 | [71, 83] | Chromatin-mark associated with repressed regions of PoIII transcripts [79]. Mapped to GRCh37/hg19 using liftOver [83]. |
| H3K4 monomethylation                      | H3K4me1         | ftp://hgdownload.cse.ucsc.edu/goldenPath/hg18/encodeDCC/wgEncodeBroadChIPSeq/ | NCBI36/hg18 | [71, 83] | Chromatin-mark associated with enhancer regions [80, 73]. Mapped to GRCh37/hg19 using liftOver [83].                   |
| H3K27 acetylation                         | H3K27ac         | ftp://hgdownload.cse.ucsc.edu/goldenPath/hg18/encodeDCC/wgEncodeBroadChIPSeq/ | NCBI36/hg18 | [71, 83] | Chromatin-mark associated with enhancer and promoter sites [71, 81, 82]. Mapped to GRCh37/hg19 using liftOver [83].    |
| Other                                     |                 |                                                                               |             |          |                                                                                                                        |
| Repeats                                   | -               | UCSC table browser (track: Masker)                                            | GRCh37/hg19 | [85, 83] | -                                                                                                                      |
| Genome gaps                               | -               | UCSC table browser (track: Gap)                                               | GRCh37/hg19 | [83]     | -                                                                                                                      |



## References

- [1] Böhlig L, Friedrich M, Engeland K: **p53 activates the PANK1/miRNA-107 gene leading to downregulation of CDK6 and p130 cell cycle proteins.** *Nucleic Acids Res* 2011, **39**(2):440–453, [<http://dx.doi.org/10.1093/nar/gkq796>].
- [2] Sohr S, Engeland K: **The tumor suppressor p53 induces expression of the pregnancy-supporting human chorionic gonadotropin (hCG) CGB7 gene.** *Cell Cycle* 2011, **10**(21):3758–3767.
- [3] Quaas M, Müller GA, Engeland K: **p53 can repress transcription of cell cycle genes through a p21(WAF1/CIP1)-dependent switch from MMB to DREAM protein complex binding at CHR promoter elements.** *Cell Cycle* 2012, **11**(24):4661–4672.
- [4] Müller GA, Quaas M, Schumann M, Krause E, Padi M, Fischer M, Litovchick L, DeCaprio JA, Engeland K: **The CHR promoter element controls cell cycle-dependent gene transcription and binds the DREAM and MMB complexes.** *Nucleic Acids Res.* 2012, **40**(4):1561–1578.
- [5] Otto C, Reiche K, Hackermüller J: **Detection of differentially expressed segments in tiling array data.** *Bioinformatics* 2012, **28**(11):1471–1479, [<http://dx.doi.org/10.1093/bioinformatics/bts142>].
- [6] Gagneur J, Toedling J, Bourgon R, Delhomme N: *genomeIntervals: Operations on genomic intervals* 2012. [R package version 1.14.0].
- [7] Ishii N, Ozaki K, Sato H, Mizuno H, Saito S, Takahashi A, Miyamoto Y, Ikegawa S, Kamatani N, Hori M, Saito S, Nakamura Y, Tanaka T: **Identification of a novel non-coding RNA, MIAT, that confers risk of myocardial infarction.** *J Hum Genet* 2006, **51**(12):1087–1099, [<http://dx.doi.org/10.1007/s10038-006-0070-9>].
- [8] Eißmann M, Gutschner T, Hämmerle M, Günther S, Caudron-Herger M, Groß M, Schirmacher P, Rippe K, Braun T, Zörnig M, Diederichs S: **Loss of the abundant nuclear non-coding RNA MALAT1 is compatible with life and development.** *RNA Biol* 2012, **9**(8):1076–1087, [<http://dx.doi.org/10.4161/rna.21089>].
- [9] Zhang B, Arun G, Mao YS, Lazar Z, Hung G, Bhattacharjee G, Xiao X, Booth CJ, Wu J, Zhang C, Spector DL: **The lncRNA Malat1 is dispensable for mouse development but its transcription plays a cis-regulatory role in the adult.** *Cell Rep* 2012, **2**:111–123, [<http://dx.doi.org/10.1016/j.celrep.2012.06.003>].
- [10] Zhou Y, Zhang X, Klibanski A: **MEG3 noncoding RNA: a tumor suppressor.** *J Mol Endocrinol* 2012, **48**(3):R45–R53, [<http://dx.doi.org/10.1530/JME-12-0008>].
- [11] Chun HK, Chung KS, Kim HC, Kang JE, Kang MA, Kim JT, Choi EH, Jung KE, Kim MH, Song EY, Kim SY, Won M, Lee HG: **OIP5 is a highly expressed potential therapeutic target for colorectal and gastric cancers.** *BMB Rep* 2010, **43**(5):349–354.
- [12] Ulitsky I, Shkumatava A, Jan CH, Sive H, Bartel DP: **Conserved function of lincRNAs in vertebrate embryonic development despite rapid sequence evolution.** *Cell* 2011, **147**(7):1537–1550, [<http://dx.doi.org/10.1016/j.cell.2011.11.055>].
- [13] Askarian-Amiri ME, Crawford J, French JD, Smart CE, Smith MA, Clark MB, Ru K, Mercer TR, Thompson ER, Lakhani SR, Vargas AC, Campbell IG, Brown MA, Dinger ME, Mattick JS: **SNORD-host RNA Zfas1 is a regulator of mammary development and a potential marker for breast cancer.** *RNA* 2011, **17**(5):878–891, [<http://dx.doi.org/10.1261/rna.2528811>].
- [14] Zhang X, Lian Z, Padden C, Gerstein MB, Rozowsky J, Snyder M, Gingeras TR, Kapranov P, Weissman SM, Newburger PE: **A myelopoiesis-associated regulatory intergenic noncoding RNA transcript within the human HOXA cluster.** *Blood* 2009, **113**(11):2526–2534, [<http://dx.doi.org/10.1182/blood-2008-06-162164>].
- [15] Wang KC, Yang YW, Liu B, Sanyal A, Corces-Zimmerman R, Chen Y, Lajoie BR, Protacio A, Flynn RA, Gupta RA, Wysocka J, Lei M, Dekker J, Helms JA, Chang HY: **A long noncoding RNA maintains active chromatin to coordinate homeotic gene expression.** *Nature* 2011, **472**(7341):120–124, [<http://dx.doi.org/10.1038/nature09819>].

- [16] Williams GT, Mourtada-Maarabouni M, Farzaneh F: **A critical role for non-coding RNA GAS5 in growth arrest and rapamycin inhibition in human T-lymphocytes.** *Biochem Soc Trans* 2011, **39**(2):482–486, [<http://dx.doi.org/10.1042/BST0390482>].
- [17] Mourtada-Maarabouni M, Pickard MR, Hedge VL, Farzaneh F, Williams GT: **GAS5, a non-protein-coding RNA, controls apoptosis and is downregulated in breast cancer.** *Oncogene* 2009, **28**(2):195–208, [<http://dx.doi.org/10.1038/onc.2008.373>].
- [18] Vigneau S, Rohrlrich PS, Brahic M, Bureau JF: **Tmevpg1, a candidate gene for the control of Theiler's virus persistence, could be implicated in the regulation of gamma interferon.** *J Virol* 2003, **77**(10):5632–5638.
- [19] Collier SP, Collins PL, Williams CL, Boothby MR, Aune TM: **Cutting edge: influence of Tmevpg1, a long intergenic noncoding RNA, on the expression of Ifng by Th1 cells.** *J Immunol* 2012, **189**(5):2084–2088, [<http://dx.doi.org/10.4049/jimmunol.1200774>].
- [20] Portales-Casamar E, Thongjuea S, Kwon AT, Arenillas D, Zhao X, Valen E, Yusuf D, Lenhard B, Wasserman WW, Sandelin A: **JASPAR 2010: the greatly expanded open-access database of transcription factor binding profiles.** *Nucleic Acids Res* 2010, **38**(Database issue):D105–D110, [<http://dx.doi.org/10.1093/nar/gkp950>].
- [21] Chen X, Xu H, Yuan P, Fang F, Huss M, Vega VB, Wong E, Orlov YL, Zhang W, Jiang J, Loh YH, Yeo HC, Yeo ZX, Narang V, Govindarajan KR, Leong B, Shahab A, Ruan Y, Bourque G, Sung WK, Clarke ND, Wei CL, Ng HH: **Integration of external signaling pathways with the core transcriptional network in embryonic stem cells.** *Cell* 2008, **133**(6):1106–1117, [<http://dx.doi.org/10.1016/j.cell.2008.04.043>].
- [22] Trimarchi T, Ntziachristos P, Aifantis I: **A new player SETs in myeloid malignancy.** *Nat Genet* 2013, **45**(8):846–847, [<http://dx.doi.org/10.1038/ng.2709>].
- [23] Cristbal I, Garcia-Orti L, Cirauqui C, Cortes-Lavaud X, Garca-Snchez MA, Calasanz MJ, Odero MD: **Overexpression of SET is a recurrent event associated with poor outcome and contributes to protein phosphatase 2A inhibition in acute myeloid leukemia.** *Haematologica* 2012, **97**(4):543–550, [<http://dx.doi.org/10.3324/haematol.2011.050542>].
- [24] Wong WSW, Nielsen R: **Detecting selection in noncoding regions of nucleotide sequences.** *Genetics* 2004, **167**(2):949–958, [<http://dx.doi.org/10.1534/genetics.102.010959>].
- [25] Hasegawa M, Kishino H, Yano T: **Dating of the human-ape splitting by a molecular clock of mitochondrial DNA.** *J Mol Evol* 1985, **22**(2):160–174.
- [26] Pu P, Zhang Z, Kang C, Jiang R, Jia Z, Wang G, Jiang H: **Downregulation of Wnt2 and beta-catenin by siRNA suppresses malignant glioma cell growth.** *Cancer Gene Ther* 2009, **16**(4):351–361, [<http://dx.doi.org/10.1038/cgt.2008.78>].
- [27] Lönn S, Rothman N, Shapiro WR, Fine HA, Selker RG, Black PM, Loeffler JS, Hutchinson AA, Inskip PD: **Genetic variation in insulin-like growth factors and brain tumor risk.** *Neuro Oncol* 2008, **10**(4):553–559, [<http://dx.doi.org/10.1215/15228517-2008-026>].
- [28] Kimmelman AC, Qiao RF, Narla G, Banno A, Lau N, Bos PD, Rodriguez NN, Liang BC, Guha A, Martignetti JA, Friedman SL, Chan AM: **Suppression of glioblastoma tumorigenicity by the Kruppel-like transcription factor KLF6.** *Oncogene* 2004, **23**(29):5077–5083, [<http://dx.doi.org/10.1038/sj.onc.1207662>].
- [29] Ying M, Sang Y, Li Y, Guerrero-Cazares H, Quinones-Hinojosa A, Vescovi AL, Eberhart CG, Xia S, Laterra J: **Krüppel-like family of transcription factor 9, a differentiation-associated transcription factor, suppresses Notch1 signaling and inhibits glioblastoma-initiating stem cells.** *Stem Cells* 2011, **29**:20–31, [<http://dx.doi.org/10.1002/stem.561>].
- [30] Joo KM, Jin J, Kim E, Kim KH, Kim Y, Kang BG, Kang YJ, Lathia JD, Cheong KH, Song PH, Kim H, Seol HJ, Kong DS, Lee JI, Rich JN, Lee J, Nam DH: **MET signaling regulates glioblastoma stem cells.** *Cancer Res* 2012, **72**(15):3828–3838, [<http://dx.doi.org/10.1158/0008-5472.CAN-11-3760>].
- [31] Veeriah S, Brennan C, Meng S, Singh B, Fagin JA, Solit DB, Paty PB, Rohle D, Vivanco I, Chmielecki J, Pao W, Ladanyi M, Gerald WL, Liao L, Cloughesy TC, Mischel PS, Sander C, Taylor B, Schultz N, Major J, Heguy A, Fang F, Mellinghoff IK, Chan TA: **The tyrosine phosphatase PTPRD is a tumor suppressor that is frequently inactivated and mutated in glioblastoma and other human cancers.** *Proc Natl Acad Sci U S A* 2009, **106**(23):9435–9440, [<http://dx.doi.org/10.1073/pnas.0900571106>].

- [32] Bruna A, Darken RS, Rojo F, Ocaña A, Peñuelas S, Arias A, Paris R, Tortosa A, Mora J, Baselga J, Seoane J: **High TGFbeta-Smad activity confers poor prognosis in glioma patients and promotes cell proliferation depending on the methylation of the PDGF-B gene.** *Cancer Cell* 2007, **11**(2):147–160, [<http://dx.doi.org/10.1016/j.ccr.2006.11.023>].
- [33] Phillips JJ, Huillard E, Robinson AE, Ward A, Lum DH, Polley MY, Rosen SD, Rowitch DH, Werb Z: **Heparan sulfate sulfatase SULF2 regulates PDGFR $\alpha$  signaling and growth in human and mouse malignant glioma.** *J Clin Invest* 2012, **122**(3):911–922, [<http://dx.doi.org/10.1172/JCI58215>].
- [34] Kohutek ZA, diPierro CG, Redpath GT, Hussaini IM: **ADAM-10-mediated N-cadherin cleavage is protein kinase C-alpha dependent and promotes glioblastoma cell migration.** *J Neurosci* 2009, **29**(14):4605–4615, [<http://dx.doi.org/10.1523/JNEUROSCI.5126-08.2009>].
- [35] Bajbouj K, Mawrin C, Hartig R, Schulze-Luehrmann J, Wilisch-Neumann A, Roessner A, Schneider-Stock R: **P53-dependent antiproliferative and pro-apoptotic effects of trichostatin A (TSA) in glioblastoma cells.** *J Neurooncol* 2012, **107**(3):503–516, [<http://dx.doi.org/10.1007/s11060-011-0791-2>].
- [36] Kapoor GS, Zhan Y, Johnson GR, O'Rourke DM: **Distinct domains in the SHP-2 phosphatase differentially regulate epidermal growth factor receptor/NF-kappaB activation through Gab1 in glioblastoma cells.** *Mol Cell Biol* 2004, **24**(2):823–836.
- [37] Ren B, Yu YP, Tseng GC, Wu C, Chen K, Rao UN, Nelson J, Michalopoulos GK, Luo JH: **Analysis of integrin alpha7 mutations in prostate cancer, liver cancer, glioblastoma multiforme, and leiomyosarcoma.** *J Natl Cancer Inst* 2007, **99**(11):868–880, [<http://dx.doi.org/10.1093/jnci/djk199>].
- [38] Song H, Li Y, Lee J, Schwartz AL, Bu G: **Low-density lipoprotein receptor-related protein 1 promotes cancer cell migration and invasion by inducing the expression of matrix metalloproteinases 2 and 9.** *Cancer Res* 2009, **69**(3):879–886, [<http://dx.doi.org/10.1158/0008-5472.CAN-08-3379>].
- [39] Ueda R, Ohkusu-Tsukada K, Fusaki N, Soeda A, Kawase T, Kawakami Y, Toda M: **Identification of HLA-A2- and A24-restricted T-cell epitopes derived from SOX6 expressed in glioma stem cells for immunotherapy.** *Int J Cancer* 2010, **126**(4):919–929, [<http://dx.doi.org/10.1002/ijc.24851>].
- [40] Li J, Yin C, Okamoto H, Mushlin H, Balgley BM, Lee CS, Yuan K, Ikejiri B, Glasker S, Vortmeyer AO, Oldfield EH, Weil RJ, Zhuang Z: **Identification of a novel proliferation-related protein, WHSC1 4a, in human gliomas.** *Neuro Oncol* 2008, **10**:45–51, [<http://dx.doi.org/10.1215/15228517-2007-036>].
- [41] Chakravarti A, Noll E, Black PM, Finkelstein DF, Finkelstein DM, Dyson NJ, Loeffler JS: **Quantitatively determined survivin expression levels are of prognostic value in human gliomas.** *J Clin Oncol* 2002, **20**(4):1063–1068.
- [42] Sallinen SL, Sallinen PK, Kononen JT, Syrjäkoski KM, Nupponen NN, Rantala IS, Helén PT, Helin HJ, Haapasalo HK: **Cyclin D1 expression in astrocytomas is associated with cell proliferation activity and patient prognosis.** *J Pathol* 1999, **188**(3):289–293, [<http://dx.doi.org/3.0.CO;2-X>].
- [43] Konduri SD, Yanamandra N, Siddique K, Joseph A, Dinh DH, Olivero WC, Gujrati M, Kouraklis G, Swaroop A, Kyritsis AP, Rao JS: **Modulation of cystatin C expression impairs the invasive and tumorigenic potential of human glioblastoma cells.** *Oncogene* 2002, **21**(57):8705–8712, [<http://dx.doi.org/10.1038/sj.onc.1205949>].
- [44] Ji H, Wang J, Fang B, Fang X, Lu Z:  **$\alpha$ -Catenin inhibits glioma cell migration, invasion, and proliferation by suppression of  $\beta$ -catenin transactivation.** *J Neurooncol* 2011, **103**(3):445–451, [<http://dx.doi.org/10.1007/s11060-010-0413-4>].
- [45] Junes-Gill KS, Gallaher TK, Gluzman-Poltorak Z, Miller JD, Wheeler CJ, Fan X, Basile LA: **hHSS1: a novel secreted factor and suppressor of glioma growth located at chromosome 19q13.33.** *J Neurooncol* 2011, **102**(2):197–211, [<http://dx.doi.org/10.1007/s11060-010-0314-6>].
- [46] Mercier ML, Fortin S, Mathieu V, Kiss R, Lefranc F: **Galectins and gliomas.** *Brain Pathol* 2010, **20**:17–27, [<http://dx.doi.org/10.1111/j.1750-3639.2009.00270.x>].
- [47] Micallef J, Taccone M, Mukherjee J, Croul S, Busby J, Moran MF, Guha A: **Epidermal growth factor receptor variant III-induced glioma invasion is mediated through myristoylated alanine-rich protein kinase C substrate overexpression.** *Cancer Res* 2009, **69**(19):7548–7556, [<http://dx.doi.org/10.1158/0008-5472.CAN-08-4783>].

- [48] Shibata T, Burger PC, Kleihues P: **Ki-67 immunoperoxidase stain as marker for the histological grading of nervous system tumours.** *Acta Neurochir Suppl (Wien)* 1988, **43**:103–106.
- [49] Jarjour AA, Durko M, Luk TL, Maral N, Shekarabi M, Kennedy TE: **Autocrine netrin function inhibits glioma cell motility and promotes focal adhesion formation.** *PLoS One* 2011, **6**(9):e25408, [<http://dx.doi.org/10.1371/journal.pone.0025408>].
- [50] Hermanson M, Funa K, Hartman M, Claesson-Welsh L, Heldin CH, Westermark B, Nistr M: **Platelet-derived growth factor and its receptors in human glioma tissue: expression of messenger RNA and protein suggests the presence of autocrine and paracrine loops.** *Cancer Res* 1992, **52**(11):3213–3219.
- [51] Fleming TP, Saxena A, Clark WC, Robertson JT, Oldfield EH, Aaronson SA, Ali IU: **Amplification and/or overexpression of platelet-derived growth factor receptors and epidermal growth factor receptor in human glial tumors.** *Cancer Res* 1992, **52**(16):4550–4553.
- [52] Kessler R, Bleichert F, Warnke JP, Eschrich K: **6-Phosphofructo-2-kinase/fructose-2,6-bisphosphatase (PFKFB3) is up-regulated in high-grade astrocytomas.** *J Neurooncol* 2008, **86**(3):257–264, [<http://dx.doi.org/10.1007/s11060-007-9471-7>].
- [53] Fischer U, Struss AK, Hemmer D, Michel A, Henn W, Steudel WI, Meese E: **PHF3 expression is frequently reduced in glioma.** *Cytogenet Cell Genet* 2001, **94**(3-4):131–136, [<http://dx.doi.org/48804>].
- [54] Pruitt KD, Tatusova T, Maglott DR: **NCBI reference sequences (RefSeq): a curated non-redundant sequence database of genomes, transcripts and proteins.** *Nucleic Acids Res* 2007, **35**(Database issue):D61–D65, [<http://dx.doi.org/10.1093/nar/gkl1842>].
- [55] Meyer LR, Zweig AS, Hinrichs AS, Karolchik D, Kuhn RM, Wong M, Sloan CA, Rosenbloom KR, Roe G, Rhead B, Raney BJ, Pohl A, Malladi VS, Li CH, Lee BT, Learned K, Kirkup V, Hsu F, Heitner S, Harte RA, Haussler M, Guruvadoo L, Goldman M, Giardine BM, Fujita PA, Dreszer TR, Diekhans M, Cline MS, Clawson H, Barber GP, Haussler D, Kent WJ: **The UCSC Genome Browser database: extensions and updates 2013.** *Nucleic Acids Res* 2012, [<http://dx.doi.org/10.1093/nar/gks1048>].
- [56] Hubbard T, Barker D, Birney E, Cameron G, Chen Y, Clark L, Cox T, Cuff J, Curwen V, Down T, Durbin R, Eyras E, Gilbert J, Hammond M, Huminiecki L, Kasprzyk A, Lehvaslaiho H, Lijnzaad P, Melsopp C, Mongin E, Pettett R, Pockock M, Potter S, Rust A, Schmidt E, Searle S, Slater G, Smith J, Spooner W, Stabenau A, Stalker J, Stupka E, Ureta-Vidal A, Vastrik I, Clamp M: **The Ensembl genome database project.** *Nucleic Acids Res* 2002, **30**:38–41.
- [57] Harrow J, Frankish A, Gonzalez JM, Tapanari E, Diekhans M, Kokocinski F, Aken BL, Barrell D, Zadissa A, Searle S, Barnes I, Bignell A, Boychenko V, Hunt T, Kay M, Mukherjee G, Rajan J, Despacio-Reyes G, Saunders G, Steward C, Harte R, Lin M, Howald C, Tanzer A, Derrien T, Chrast J, Walters N, Balasubramanian S, Pei B, Tress M, Rodriguez JM, Ezkurdia I, van Baren J, Brent M, Haussler D, Kellis M, Valencia A, Reymond A, Gerstein M, Guigó R, Hubbard TJ: **GENCODE: the reference human genome annotation for The ENCODE Project.** *Genome Res* 2012, **22**(9):1760–1774, [<http://dx.doi.org/10.1101/gr.135350.111>].
- [58] Washietl S, Findeiß S, Müller SA, Kalkhof S, von Bergen M, Hofacker IL, Stadler PF, Goldman N: **RNA-code: robust discrimination of coding and noncoding regions in comparative sequence data.** *RNA* 2011, **17**(4):578–594, [<http://dx.doi.org/10.1261/rna.2536111>].
- [59] Cabili MN, Trapnell C, Goff L, Koziol M, Tazon-Vega B, Regev A, Rinn JL: **Integrative annotation of human large intergenic noncoding RNAs reveals global properties and specific subclasses.** *Genes Dev* 2011, **25**(18):1915–1927, [<http://dx.doi.org/10.1101/gad.17446611>].
- [60] Mondal T, Rasmussen M, Pandey GK, Isaksson A, Kanduri C: **Characterization of the RNA content of chromatin.** *Genome Res* 2010, **20**(7):899–907, [<http://dx.doi.org/10.1101/gr.103473.109>].
- [61] Amaral PP, Clark MB, Gascoigne DK, Dinger ME, Mattick JS: **lncRNAdb: a reference database for long noncoding RNAs.** *Nucleic Acids Res* 2011, **39**(Database issue):D146–D151, [<http://dx.doi.org/10.1093/nar/gkq1138>].
- [62] Kent WJ: **BLAT—the BLAST-like alignment tool.** *Genome Res* 2002, **12**(4):656–664, [<http://dx.doi.org/10.1101/gr.229202.ArticlepublishedonlinebeforeMarch2002>].



- [63] Lestrade L, Weber MJ: **snoRNA-LBME-db, a comprehensive database of human H/ACA and C/D box snoRNAs.** *Nucleic Acids Res* 2006, **34**(Database issue):D158–D162, [<http://dx.doi.org/10.1093/nar/gkj002>].
- [64] Griffiths-Jones S: **The microRNA Registry.** *Nucleic Acids Res* 2004, **32**(Database issue):D109–D111, [<http://dx.doi.org/10.1093/nar/gkh023>].
- [65] Nakaya HI, Amaral PP, Louro R, Lopes A, Fachel AA, Moreira YB, El-Jundi TA, da Silva AM, Reis EM, Verjovski-Almeida S: **Genome mapping and expression analyses of human intronic noncoding RNAs reveal tissue-specific patterns and enrichment in genes related to regulation of transcription.** *Genome Biol* 2007, **8**(3):R43, [<http://dx.doi.org/10.1186/gb-2007-8-3-r43>].
- [66] Pedersen JS, Bejerano G, Siepel A, Rosenbloom K, Lindblad-Toh K, Lander ES, Kent J, Miller W, Haussler D: **Identification and classification of conserved RNA secondary structures in the human genome.** *PLoS Comput Biol* 2006, **2**(4):e33.
- [67] Washietl S, Hofacker IL, Stadler PF: **Fast and reliable prediction of noncoding RNAs.** *Proc Natl Acad Sci U S A* 2005, **102**(7):2454–2459.
- [68] Gruber A, Findeiß S, Washietl S, Hofacker I, Stadler P: **RNAz 2.0: Improved noncoding RNA detection.** In *PSB in press* 2010.
- [69] Gesell T, Washietl S: **Dinucleotide controlled null models for comparative RNA gene prediction.** *BMC Bioinformatics* 2008, **9**:248.
- [70] Smith MA, Gesell T, Stadler PF, Mattick JS: **Widespread purifying selection on RNA structure in mammals.** *Nucleic Acids Res* 2013, [<http://dx.doi.org/10.1093/nar/gkt596>].
- [71] The ENCODE Project Consortium: **Identification and analysis of functional elements in 1% of the human genome by the ENCODE pilot project.** *Nature* 2007, **447**(7146):799–816.
- [72] Roh TY, Cuddapah S, Cui K, Zhao K: **The genomic landscape of histone modifications in human T cells.** *Proc Natl Acad Sci U S A* 2006, **103**(43):15782–15787, [<http://dx.doi.org/10.1073/pnas.0607617103>].
- [73] Bulger M, Groudine M: **Enhancers: the abundance and function of regulatory sequences beyond promoters.** *Dev Biol* 2010, **339**(2):250–257, [<http://dx.doi.org/10.1016/j.ydbio.2009.11.035>].
- [74] Deaton AM, Bird A: **CpG islands and the regulation of transcription.** *Genes Dev* 2011, **25**(10):1010–1022, [<http://dx.doi.org/10.1101/gad.2037511>].
- [75] Guenther MG, Levine SS, Boyer LA, Jaenisch R, Young RA: **A chromatin landmark and transcription initiation at most promoters in human cells.** *Cell* 2007, **130**:77–88, [<http://dx.doi.org/10.1016/j.cell.2007.05.042>].
- [76] Xi H, Shulha HP, Lin JM, Vales TR, Fu Y, Bodine DM, McKay RDG, Chenoweth JG, Tesar PJ, Furey TS, Ren B, Weng Z, Crawford GE: **Identification and characterization of cell type-specific and ubiquitous chromatin regulatory structures in the human genome.** *PLoS Genet* 2007, **3**(8):e136, [<http://dx.doi.org/10.1371/journal.pgen.0030136>].
- [77] Wingender E, Chen X, Hehl R, Karas H, Liebich I, Matys V, Meinhardt T, Prüss M, Reuter I, Schacherer F: **TRANSFAC: an integrated system for gene expression regulation.** *Nucleic Acids Res* 2000, **28**:316–319.
- [78] Mikkelsen TS, Ku M, Jaffe DB, Issac B, Lieberman E, Giannoukos G, Alvarez P, Brockman W, Kim TK, Koche RP, Lee W, Mendenhall E, O'Donovan A, Presser A, Russ C, Xie X, Meissner A, Wernig M, Jaenisch R, Nusbaum C, Lander ES, Bernstein BE: **Genome-wide maps of chromatin state in pluripotent and lineage-committed cells.** *Nature* 2007, **448**(7153):553–560, [<http://dx.doi.org/10.1038/nature06008>].
- [79] Barski A, Cuddapah S, Cui K, Roh TY, Schonnes DE, Wang Z, Wei G, Chepelev I, Zhao K: **High-resolution profiling of histone methylations in the human genome.** *Cell* 2007, **129**(4):823–837, [<http://dx.doi.org/10.1016/j.cell.2007.05.009>].
- [80] Heintzman ND, Stuart RK, Hon G, Fu Y, Ching CW, Hawkins RD, Barrera LO, Calcar SV, Qu C, Ching KA, Wang W, Weng Z, Green RD, Crawford GE, Ren B: **Distinct and predictive chromatin signatures of transcriptional promoters and enhancers in the human genome.** *Nat Genet* 2007, **39**(3):311–318, [<http://dx.doi.org/10.1038/ng1966>].

- [81] Terrenoire E, McRonald F, Halsall JA, Page P, Illingworth RS, Taylor AMR, Davison V, O'Neill LP, Turner BM: **Immunostaining of modified histones defines high-level features of the human metaphase epigenome.** *Genome Biol* 2010, **11**(11):R110, [<http://dx.doi.org/10.1186/gb-2010-11-11-r110>].
- [82] Shin JH, Li RW, Gao Y, Baldwin R 6th, Li Cj: **Genome-wide ChIP-seq mapping and analysis reveal butyrate-induced acetylation of H3K9 and H3K27 correlated with transcription activity in bovine cells.** *Funct Integr Genomics* 2012, **12**:119–130, [<http://dx.doi.org/10.1007/s10142-012-0263-6>].
- [83] Kuhn RM, Haussler D, Kent WJ: **The UCSC genome browser and associated tools.** *Brief. Bioinformatics* 2012.
- [84] Gardiner-Garden M, Frommer M: **CpG islands in vertebrate genomes.** *J. Mol. Biol.* 1987, **196**(2):261–282.
- [85] Smit A, Hubley R, Green P: *RepeatMasker Open-3.0* 2010, [<http://www.repeatmasker.org>].
